# Supplementary material for: [3+1+1] type cyclization of ClCF2COONa for the assembly of imidazoles and tetrazoles via in situ generated isocyanides
Source: Royal Society of Chemistry journal article supplement (doi:10.1039/d0cc01919d), 2020-01-01

## Supporting Information

### **[3+1+1] Type Cyclization of ClCF<sub>2</sub>COONa for the Assembly of Imidazoles and Tetrazoles via In-Situ Generated Isocyanides**

Ya Wang,<sup>a</sup> Yao Zhou,<sup>b</sup> and Qiuling Song\*<sup>a</sup>

<sup>a</sup> Institute of Next Generation Matter Transformation, College of Material Sciences & Engineering at Huaqiao University, 668 Jimei Blvd, Xiamen, Fujian, 361021, China.

<sup>b</sup> College of Chemistry and Chemical Engineering, Hubei Normal University, Huangshi 435002, Hubei, P. R China.

\*Email: [qsong@hqu.edu.cn](mailto:qsong@hqu.edu.cn)

## Table of Contents

|                                                                       |    |
|-----------------------------------------------------------------------|----|
| 1. General information.....                                           | 3  |
| 2. Screening of the reaction conditions.....                          | 4  |
| 3. General procedure for the synthesis of <b>4</b> and <b>6</b> ..... | 5  |
| 4. Control experiments.....                                           | 6  |
| 5. Crystal data of <b>4e</b> , <b>4u</b> and <b>6a</b> .....          | 7  |
| 6. Characterization data for products.....                            | 10 |
| 7. NMR spectroscopic data.....                                        | 22 |

## 1. General information

All chemicals were purchased from Adamas Reagent, Ltd, Energy chemical company, J&K Scientific Ltd, Alfa Aesa chemical company and so forth.  $\text{CH}_3\text{CN}$  was dried by  $\text{CaH}$  prior to use. Unless otherwise stated, all experiments were conducted in a seal tube under  $\text{N}_2$  atmosphere. Reactions were monitored by TLC or GC-MS analysis. Flash column chromatography was performed over silica gel (200-300 mesh).

$^1\text{H}$ -NMR and  $^{13}\text{C}$ -NMR spectra were recorded in  $\text{CDCl}_3$  on a Bruker Avance 500 spectrometer (500 MHz  $^1\text{H}$ , 125 MHz  $^{13}\text{C}$ ) at room temperature. Chemical shifts were reported in ppm on the scale relative to  $\text{CDCl}_3$  ( $\delta = 7.26$  for  $^1\text{H}$ -NMR,  $\delta = 77.00$  for  $^{13}\text{C}$ -NMR) or  $\text{DMSO-d}_6$  ( $\delta = 2.50$  for  $^1\text{H}$ -NMR,  $\delta = 39.60$  for  $^{13}\text{C}$ -NMR) as an internal reference. High resolution mass spectra were recorded using Q-TOF time-of-flight mass spectrometer. Coupling constants (J) were reported in Hertz (Hz).

## 2. Screening of the Reaction Conditions

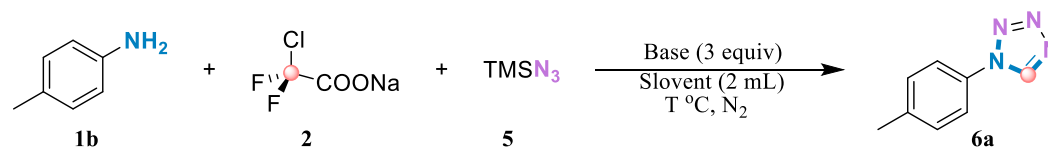

| Entry <sup>a</sup>    | [Cu]                 | Ligand    | Base                            | Solvent                 | T °C       | Yield <sup>b</sup> |
|-----------------------|----------------------|-----------|---------------------------------|-------------------------|------------|--------------------|
| 1                     | CuCl <sub>2</sub>    | 1,10-Phen | Cs <sub>2</sub> CO <sub>3</sub> | CH <sub>3</sub> CN      | 100        | 31                 |
| 2                     | CuCl <sub>2</sub>    | 1,10-Phen | K <sub>2</sub> CO <sub>3</sub>  | CH <sub>3</sub> CN      | 100        | 25                 |
| 3                     | CuCl <sub>2</sub>    | 1,10-Phen | Na <sub>2</sub> CO <sub>3</sub> | CH <sub>3</sub> CN      | 100        | 20                 |
| 4                     | CuCl <sub>2</sub>    | 1,10-Phen | K <sub>3</sub> PO <sub>4</sub>  | CH <sub>3</sub> CN      | 100        | 50                 |
| 5                     | CuCl <sub>2</sub>    | 1,10-Phen | NaHCO <sub>3</sub>              | CH <sub>3</sub> CN      | 100        | 52                 |
| 6                     | CuBr <sub>2</sub>    | 1,10-Phen | NaHCO <sub>3</sub>              | CH <sub>3</sub> CN      | 100        | 38                 |
| 7                     | Cu(OAc) <sub>2</sub> | 1,10-Phen | NaHCO <sub>3</sub>              | CH <sub>3</sub> CN      | 100        | 50                 |
| 8                     | Cu <sub>2</sub> O    | 1,10-Phen | NaHCO <sub>3</sub>              | CH <sub>3</sub> CN      | 100        | 37                 |
| 9                     | CuCl <sub>2</sub>    | 1,10-Phen | NaHCO <sub>3</sub>              | 1,4-dioxane             | 100        | N.R.               |
| 10                    | CuCl <sub>2</sub>    | 1,10-Phen | NaHCO <sub>3</sub>              | EA                      | 100        | trace              |
| 11                    | CuCl <sub>2</sub>    | 1,10-Phen | NaHCO <sub>3</sub>              | THF                     | 100        | N.R.               |
| 12                    | CuCl <sub>2</sub>    | 1,10-Phen | NaHCO <sub>3</sub>              | DCE                     | 100        | trace              |
| 13                    | CuCl <sub>2</sub>    | 1,10-Phen | NaHCO <sub>3</sub>              | CH <sub>3</sub> CN      | 80         | 48                 |
| 14                    | CuCl <sub>2</sub>    | 1,10-Phen | NaHCO <sub>3</sub>              | CH <sub>3</sub> CN      | 90         | 52                 |
| 16                    | CuCl <sub>2</sub>    | 1,10-Phen | NaHCO <sub>3</sub>              | CH <sub>3</sub> CN      | 110        | 50                 |
| 17                    | CuCl <sub>2</sub>    | 1,10-Phen | -                               | CH <sub>3</sub> CN      | 100        | N.R.               |
| 18                    | -                    | -         | NaHCO <sub>3</sub>              | CH <sub>3</sub> CN      | 100        | 52                 |
| 19 <sup>c</sup>       | -                    | -         | NaHCO <sub>3</sub>              | CH <sub>3</sub> CN      | 100        | 78                 |
| <b>20<sup>d</sup></b> | -                    | -         | <b>NaHCO<sub>3</sub></b>        | <b>CH<sub>3</sub>CN</b> | <b>100</b> | <b>78</b>          |
| 21 <sup>e</sup>       | -                    | -         | NaHCO <sub>3</sub>              | CH <sub>3</sub> CN      | 100        | 64                 |

<sup>a</sup>All reactions were carried out with **1** (0.2 mmol), **2** (0.4 mmol) **3** (0.6 mmol), base (0.8 mmol) Cu salt (15 mol%) and ligand (20 mol%) in solvent (2 mL) under N<sub>2</sub> atmosphere at 100 °C for 18 h.

<sup>b</sup>Isolated yield <sup>c</sup>**2** (0.6 mmol). <sup>d</sup>**2** (0.6 mmol), base(0.6 mmol). <sup>e</sup>**2** (0.4 mmol), base (0.4 mmol).

### 3. General procedure for the synthesis of 4 and 6

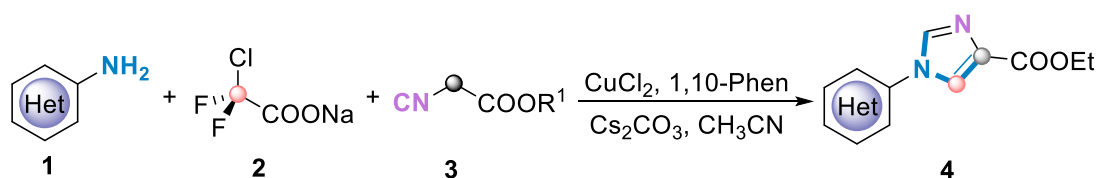

CH<sub>3</sub>CN (2 mL) was added to a mixture of CuCl<sub>2</sub> (4.1 mg, 15 mol%), 1,10-Phen (20 mol%), anilines **1** (0.2 mmol, 1 equiv), ClCF<sub>2</sub>COONa **2** (0.6 mmol, 3 equiv) and isocyanoacetates **3** (0.3 mmol, 1.5 equiv) in the presence of Cs<sub>2</sub>CO<sub>3</sub> (0.6 mmol, 3 equiv). Then the sealed tube was stirred at 100 °C under N<sub>2</sub> for 16 h. Upon completion of the reaction, the solvent was evaporated under reduced pressure and the residue was purified by flash column chromatograph (silica gel, petroleum ether:EtOAc = 1:1, v/v) to give the desired product **4**.

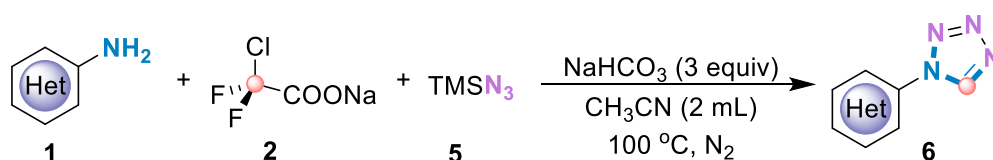

CH<sub>3</sub>CN (2 mL) was added to a mixture of anilines **1** (0.2 mmol, 1 equiv), ClCF<sub>2</sub>COONa **2** (0.6 mmol, 3 equiv) and TMSN<sub>3</sub> **3** (0.6 mmol, 3 equiv) in the presence of NaHCO<sub>3</sub> (0.6 mmol, 3 equiv). Then the sealed tube was stirred at 100 °C under N<sub>2</sub> for 16 h. Upon completion of the reaction, the solvent was evaporated under reduced pressure and the residue was purified by flash column chromatograph (silica gel, petroleum ether:EtOAc = 3:1, v/v) to give the desired product **6**.

## 4. Control experiments

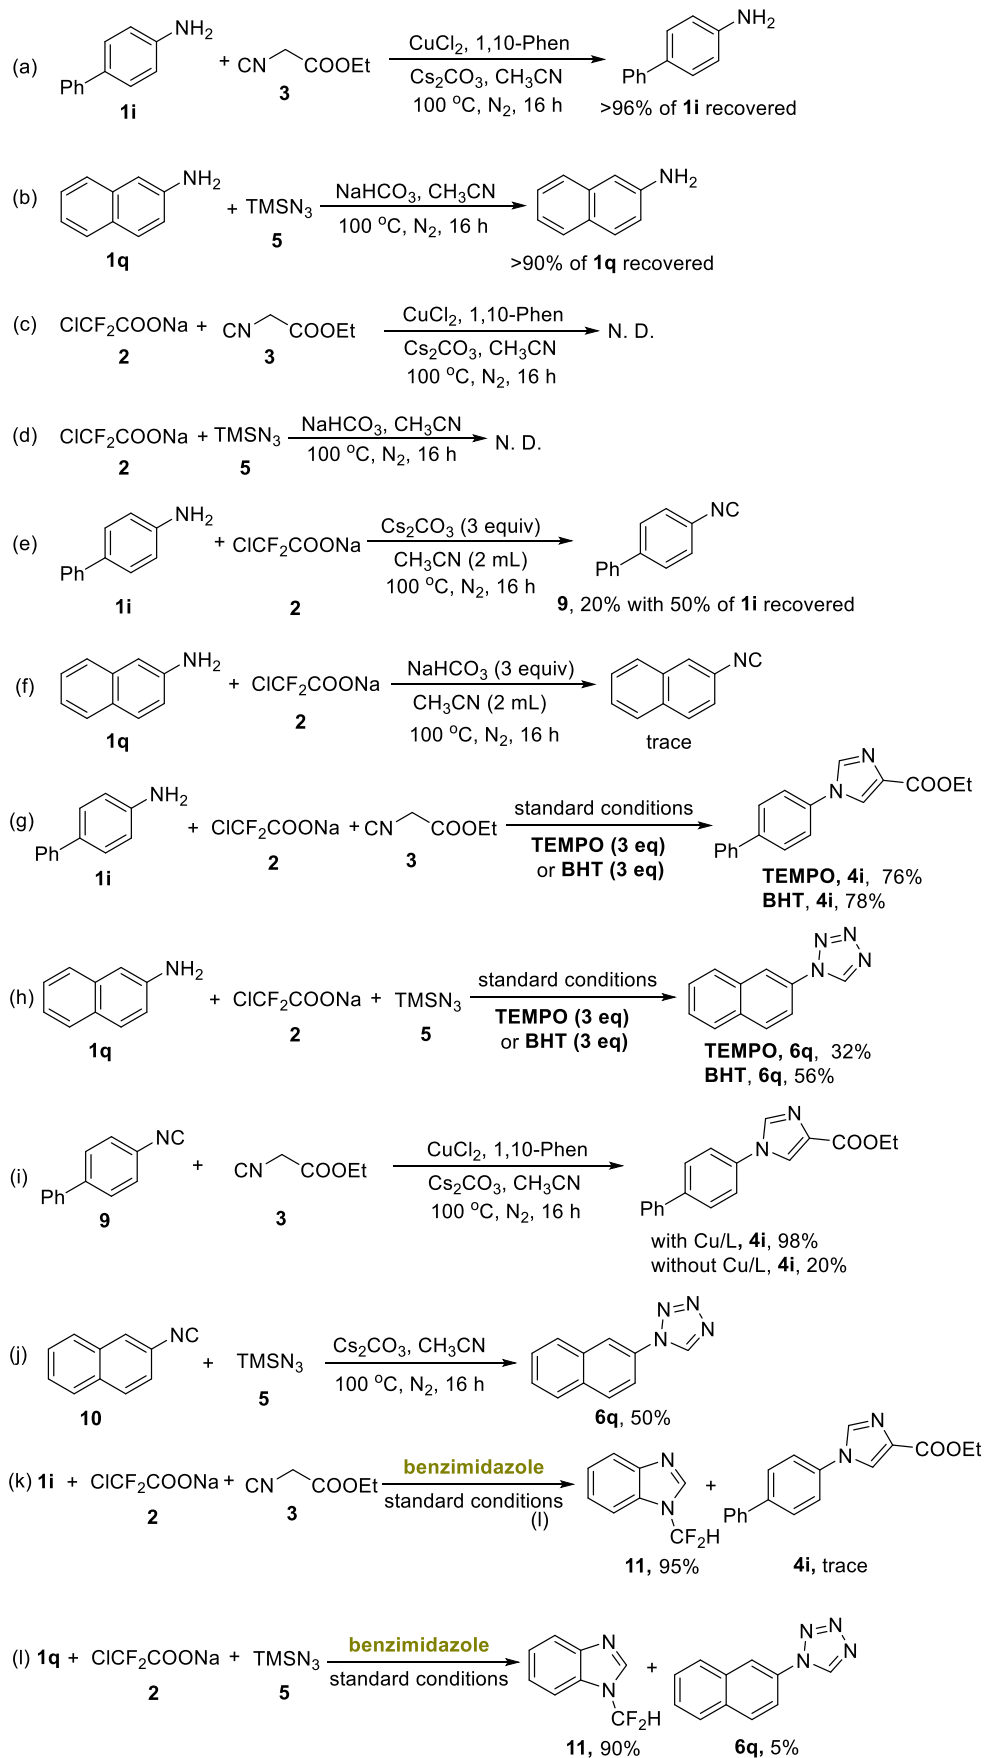

## 5. Crystal data of 4e, 4u and 6a

Crystallographic data for compound **4e** (CCDC-1917599) has been deposited with the Cambridge Crystallographic Data Centre. Copies of the data can be obtained, free of charge, on application to CCDC (Email:deposit@ccdc.cam.ac.uk).

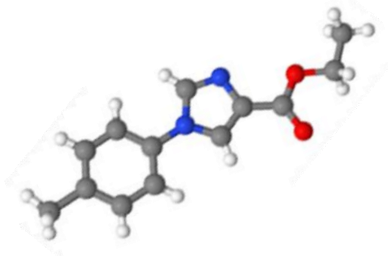

Bond precision: C-C = 0.0029 Å Wavelength=0.71073  
Cell: a=16.722(4) b=7.3514(16) c=20.934(4)  
alpha=90 beta=102.85(2) gamma=90

Temperature: 293 K

|                                                                                         | Calculated                                                    | Reported                                                      |
|-----------------------------------------------------------------------------------------|---------------------------------------------------------------|---------------------------------------------------------------|
| Volume                                                                                  | 2509.0(10)                                                    | 2509.1(10)                                                    |
| Space group                                                                             | I 2/a                                                         | I 1 2/a 1                                                     |
| Hall group                                                                              | -I 2ya                                                        | -I 2ya                                                        |
| Moiety formula                                                                          | C <sub>13</sub> H <sub>14</sub> N <sub>2</sub> O <sub>2</sub> | C <sub>13</sub> H <sub>14</sub> N <sub>2</sub> O <sub>2</sub> |
| Sum formula                                                                             | C <sub>13</sub> H <sub>14</sub> N <sub>2</sub> O <sub>2</sub> | C <sub>13</sub> H <sub>14</sub> N <sub>2</sub> O <sub>2</sub> |
| Mr                                                                                      | 230.26                                                        | 230.26                                                        |
| D <sub>x</sub> , g cm <sup>-3</sup>                                                     | 1.219                                                         | 1.219                                                         |
| Z                                                                                       | 8                                                             | 8                                                             |
| Mu (mm <sup>-1</sup> )                                                                  | 0.084                                                         | 0.084                                                         |
| F <sub>000</sub>                                                                        | 976.0                                                         | 976.0                                                         |
| F <sub>000</sub> '                                                                      | 976.43                                                        |                                                               |
| h,k,lmax                                                                                | 19,8,24                                                       | 19,8,24                                                       |
| N <sub>ref</sub>                                                                        | 2208                                                          | 2199                                                          |
| T <sub>min</sub> ,T <sub>max</sub>                                                      |                                                               | 0.496,1.000                                                   |
| T <sub>min</sub> '                                                                      |                                                               |                                                               |
| Correction method= # Reported T Limits: T <sub>min</sub> =0.496 T <sub>max</sub> =1.000 |                                                               |                                                               |
| AbsCorr = MULTI-SCAN                                                                    |                                                               |                                                               |
| Data completeness= 0.996                                                                | Theta(max)= 24.999                                            |                                                               |
| R(reflections)= 0.0487( 1614)                                                           | wR2(reflections)= 0.1543( 2199)                               |                                                               |
| S = 1.004                                                                               | N <sub>par</sub> = 156                                        |                                                               |

Crystallographic data for compound **4u** (CCDC-1917630) has been deposited with the Cambridge Crystallographic Data Centre. Copies of the data can be obtained, free of charge, on application to CCDC (Email:deposit@ccdc.cam.ac.uk).

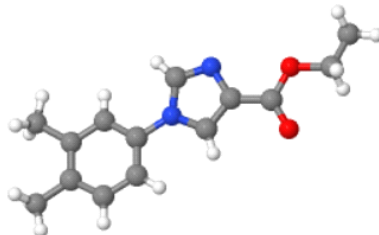

Bond precision: C-C = 0.0049 Å Wavelength=0.71073  
 Cell: a=8.1279(14) b=8.6652(15) c=18.746(2)  
 alpha=90 beta=96.939(14) gamma=90  
 Temperature: 293 K

|                        | Calculated    | Reported      |
|------------------------|---------------|---------------|
| Volume                 | 1310.6(4)     | 1310.6(4)     |
| Space group            | P 21/n        | P 1 21/n 1    |
| Hall group             | -P 2yn        | -P 2yn        |
| Moiety formula         | C14 H16 N2 O2 | C14 H16 N2 O2 |
| Sum formula            | C14 H16 N2 O2 | C14 H16 N2 O2 |
| Mr                     | 244.29        | 244.29        |
| Dx, g cm <sup>-3</sup> | 1.238         | 1.238         |
| Z                      | 4             | 4             |
| Mu (mm <sup>-1</sup> ) | 0.084         | 0.084         |
| F000                   | 520.0         | 520.0         |
| F000'                  | 520.22        |               |
| h,k,lmax               | 9,10,22       | 9,10,22       |
| Nref                   | 2313          | 2276          |
| Tmin,Tmax              |               | 0.649,1.000   |
| Tmin'                  |               |               |

Correction method= # Reported T Limits: Tmin=0.649 Tmax=1.000

AbsCorr = MULTI-SCAN

Data completeness= 0.984 Theta(max)= 24.996

R(reflections)= 0.0743( 1333) wR2(reflections)= 0.2180( 2276)

S = 1.112 Npar= 166



Crystallographic data for compound **6a** (CCDC-1937993) has been deposited with the Cambridge Crystallographic Data Centre, Copies of the data can be obtained, free of charge, on application to CCDC (Email:deposit@ccdc.cam.ac.uk).

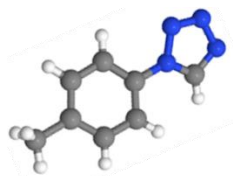

Bond precision: C-C = 0.0021 Å Wavelength=0.71073

Cell: a=9.7747(9) b=5.6834(5) c=14.3307(13)  
 alpha=90 beta=96.261(9) gamma=90

Temperature: 293 K

|                        | Calculated  | Reported    |
|------------------------|-------------|-------------|
| Volume                 | 791.37(12)  | 791.37(12)  |
| Space group            | P 21/n      | P 1 21/n 1  |
| Hall group             | -P 2yn      | -P 2yn      |
| Moiety formula         | C8 H8 N4    | C8 H8 N4    |
| Sum formula            | C8 H8 N4    | C8 H8 N4    |
| Mr                     | 160.18      | 160.18      |
| Dx, g cm <sup>-3</sup> | 1.344       | 1.344       |
| Z                      | 4           | 4           |
| Mu (mm <sup>-1</sup> ) | 0.089       | 0.089       |
| F000                   | 336.0       | 336.0       |
| F000'                  | 336.09      |             |
| h,k,lmax               | 13,7,19     | 12,7,19     |
| Nref                   | 2133        | 1834        |
| Tmin,Tmax              | 0.989,0.991 | 0.733,1.000 |
| Tmin'                  | 0.989       |             |

Correction method= # Reported T Limits: Tmin=0.733 Tmax=1.000

AbsCorr = MULTI-SCAN

Data completeness= 0.860 Theta(max)= 29.142

R(reflections)= 0.0483( 1174) wR2(reflections)= 0.1511( 1834)

S = 1.037 Npar= 111

## 6. Characterization data for products

### ethyl 1-phenyl-1*H*-imidazole-4-carboxylate (4a) (CAS Number: 197079-08-6)

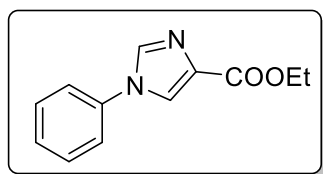

The reaction was performed following the general procedure. The residue was purified by flash column chromatograph (silica gel, petroleum ether:AcOEt = 1:1, v/v) to give the product as a pale yellow solid (35.0 mg, 81%). <sup>1</sup>H NMR (500 MHz, CDCl<sub>3</sub>) δ 7.94 (d, *J* = 1.4 Hz, 1H), 7.84 (d, *J* = 1.3 Hz, 1H), 7.49 (d, *J* = 8.0 Hz, 2H), 7.41 (m, 3H), 4.38 (d, *J* = 7.1 Hz, 2H), 1.39 (t, *J* = 7.1 Hz, 3H). <sup>13</sup>C NMR (125 MHz, CDCl<sub>3</sub>) δ 162.7, 136.5, 136.3, 135.1, 130.1, 128.4, 124.0, 121.7, 60.7, 14.4.

### ethyl 1-(4-fluorophenyl)-1*H*-imidazole-4-carboxylate (4b) (CAS Number: 114067-93-5)

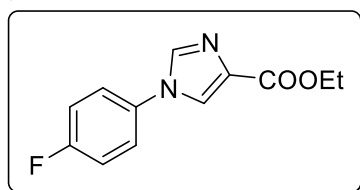

The reaction was performed following the general procedure. The residue was purified by flash column chromatograph (silica gel, petroleum ether:AcOEt = 1:1, v/v) to give the product as a yellow solid (33.7 mg, 72%). <sup>1</sup>H NMR (500 MHz, CDCl<sub>3</sub>) δ 7.87 (d, *J* = 1.1 Hz, 1H), 7.77 (d, *J* = 1.2 Hz, 1H), 7.38 (dd, *J* = 8.9, 4.5 Hz, 2H), 7.18 (t, *J* = 8.5 Hz, 2H), 4.36 (m, 2H), 1.37 (td, *J* = 7.1, 0.8 Hz, 3H). <sup>13</sup>C NMR (125 MHz, CDCl<sub>3</sub>) δ 162.6, 162.2 (d, *J* = 247.6 Hz), 136.5, 135.1, 132.7 (d, *J* = 3.1 Hz), 124.3, 123.8 (d, *J* = 8.6 Hz), 117.1 (d, *J* = 23.1 Hz), 60.8, 14.4.

### ethyl 1-(4-chlorophenyl)-1*H*-imidazole-4-carboxylate (4c) (CAS number: 1260654-52-1)

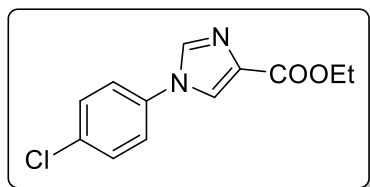

The reaction was performed following the general procedure. The residue was purified by flash column chromatograph (silica gel, petroleum ether:AcOEt = 1:1, v/v) to give the product as a yellow solid (31.0 mg, 62%). <sup>1</sup>H NMR (500 MHz, CDCl<sub>3</sub>) δ 7.90 (d, *J* = 1.3 Hz, 1H), 7.82 (d, *J* = 1.2 Hz, 1H), 7.47 (d, *J* = 8.8 Hz, 2H), 7.35 (d, *J* = 8.8 Hz, 2H), 4.37 (q, *J* = 7.1 Hz, 2H), 1.38 (t, *J* = 7.1 Hz, 3H). <sup>13</sup>C NMR (125 MHz, CDCl<sub>3</sub>) δ 162.6, 136.2, 135.3, 135.0, 134.3, 130.3, 123.9, 123.0, 60.9, 14.4.

### ethyl 1-(4-bromophenyl)-1*H*-imidazole-4-carboxylate (4d) (CAS Number: 1260758-76-6)

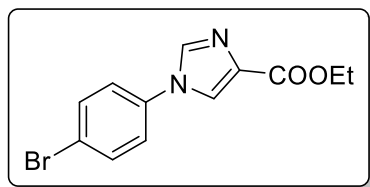

The reaction was performed following the general procedure. The residue was purified by flash column chromatograph (silica gel, petroleum ether:AcOEt = 1:1, v/v) to give the product as a yellow solid (32.3 mg, 55%). <sup>1</sup>H NMR (500 MHz, CDCl<sub>3</sub>) δ 7.91 (d, *J* = 1.4 Hz, 1H), 7.83 (d, *J* = 1.3 Hz, 1H), 7.64 (d, *J* = 8.8 Hz, 2H), 7.30 (d, *J* = 8.7 Hz, 2H), 4.39 (q, *J* = 7.1 Hz, 2H), 1.39 (t, *J* = 7.1 Hz, 3H). <sup>13</sup>C NMR (125 MHz, CDCl<sub>3</sub>) δ 162.6, 136.1, 135.5, 135.4, 133.3, 123.8, 123.2, 122.1, 60.9, 14.4.

**ethyl 1-(*p*-tolyl)-1*H*-imidazole-4-carboxylate (4e) (CAS Number: 943144-41-0)**

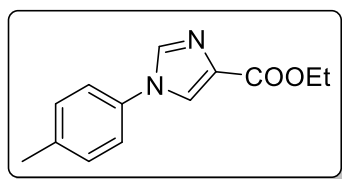

The reaction was performed following the general procedure. The residue was purified by flash column chromatograph (silica gel, petroleum ether:AcOEt = 1:1, v/v) to give the product as a pale yellow solid (43.7 mg, 95%). <sup>1</sup>H NMR (500 MHz, CDCl<sub>3</sub>) δ 7.89 (d, *J* = 1.3 Hz, 1H), 7.79 (d, *J* = 1.2 Hz, 1H), 7.27 (s, 2H), 4.37 (q, 2H), 2.39 (s, 3H), 1.38 (t, *J* = 7.1 Hz, 3H). <sup>13</sup>C NMR (125 MHz, CDCl<sub>3</sub>) δ 162.8, 138.5, 136.3, 134.9, 134.1, 130.6, 124.1, 121.6, 60.7, 21.0, 14.4.

**ethyl 1-(4-propylphenyl)-1*H*-imidazole-4-carboxylate (4f)**

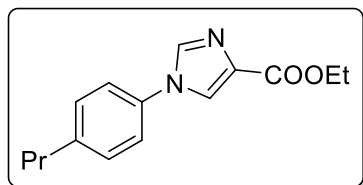

The reaction was performed following the general procedure. The residue was purified by flash column chromatograph (silica gel, petroleum ether:AcOEt = 1:1, v/v) to give the product as a yellow solid (33.5 mg, 65%). <sup>1</sup>H NMR (500 MHz, CDCl<sub>3</sub>) δ 7.95 – 7.85 (m, 1H), 7.81 (d, *J* = 1.3 Hz, 1H), 7.29 (s, 3H), 4.38 (q, *J* = 7.1 Hz, 2H), 2.62 (d, *J* = 7.8 Hz, 1H), 1.64 (dt, *J* = 14.9, 7.5 Hz, 2H), 1.38 (m, 2H), 0.94 (t, *J* = 7.3 Hz, 3H). <sup>13</sup>C NMR (125 MHz, CDCl<sub>3</sub>) δ 162.8, 143.3, 136.4, 134.9, 134.2, 130.0, 124.1, 121.6, 60.7, 37.4, 24.4, 14.4, 13.7. HRMS (ESI, *m/z*) calcd for C<sub>15</sub>H<sub>18</sub>N<sub>2</sub>O<sub>2</sub> [M+H]<sup>+</sup>: 259.1441; found: 259.1437.

**ethyl 1-(4-isopropylphenyl)-1*H*-imidazole-4-carboxylate (4g)**

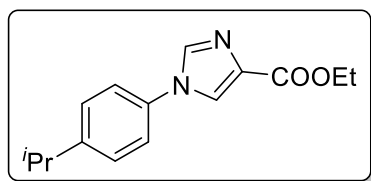

The reaction was performed following the general procedure. The residue was purified by flash column chromatograph (silica gel, petroleum ether:AcOEt = 1:1, v/v) to give the product as a yellow solid (31.0 mg, 60%). <sup>1</sup>H NMR (500 MHz, CDCl<sub>3</sub>) δ 7.92 – 7.89 (m, 1H), 7.81 (d, *J* = 1.2 Hz, 1H), 7.32 (t, *J* = 7.9 Hz, 4H), 4.38 (q, *J* = 7.1 Hz, 3H), 2.95 (dd, *J* = 13.8, 6.9 Hz, 1H), 1.39 (t, *J* = 7.1 Hz, 5H), 1.27 (s, 3H), 1.26 (s, 3H). <sup>13</sup>C NMR (125 MHz, CDCl<sub>3</sub>) δ 162.8, 149.5, 136.4, 134.9, 134.3, 128.0, 124.1, 121.7, 60.7, 33.8, 23.9, 14.4. HRMS (ESI, *m/z*) calcd for C<sub>15</sub>H<sub>18</sub>N<sub>2</sub>O<sub>2</sub> [M+H]<sup>+</sup>: 259.1441; found: 259.1439.

**ethyl 1-(4-(*tert*-butyl)phenyl)-1*H*-imidazole-4-carboxylate (4h)**

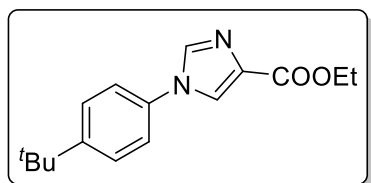

The reaction was performed following the general procedure. The residue was purified by flash column chromatograph (silica gel, petroleum ether:AcOEt = 1:1, v/v) to give the product as a yellow solid (43.5 mg, 80%). <sup>1</sup>H NMR (500 MHz, CDCl<sub>3</sub>) δ 7.92 (d, *J* = 1.3 Hz, 1H), 7.81 (d, *J* = 1.3 Hz, 1H), 7.50 (d, *J* = 8.7 Hz, 2H), 7.32 (d, *J* = 8.7 Hz, 2H), 4.38 (q, *J* = 7.1 Hz, 2H), 1.39 (t, *J* = 7.1 Hz, 3H), 1.34 (s, 7H). <sup>13</sup>C NMR (125 MHz, CDCl<sub>3</sub>) δ 162.8, 151.8, 136.4, 134.9, 134.0, 127.0, 124.1, 121.4, 60.7, 34.8, 31.3, 14.4. HRMS (ESI, *m/z*) calcd for C<sub>16</sub>H<sub>20</sub>N<sub>2</sub>O<sub>2</sub> [M+H]<sup>+</sup>: 273.1598; found: 273.1599.

**ethyl 1-([1,1'-biphenyl]-4-yl)-1H-imidazole-4-carboxylate (4i)**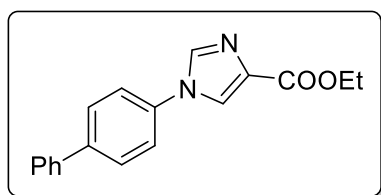

The reaction was performed following the general procedure. The residue was purified by flash column chromatograph (silica gel, petroleum ether:AcOEt = 1:1, v/v) to give the product as a yellow solid (45.6 mg, 78%). <sup>1</sup>H NMR (500 MHz, CDCl<sub>3</sub>) δ 7.99 (d, *J* = 1.1 Hz, 1H), 7.89 (d, *J* = 1.1 Hz, 1H), 7.71 (d, *J* = 8.4 Hz, 2H), 7.59 (m, 2H), 7.47 (m, 4H), 7.39 (t, *J* = 7.3 Hz, 1H), 4.41 (q, *J* = 7.1 Hz, 2H), 1.41 (t, *J* = 7.2 Hz, 3H). <sup>13</sup>C NMR (125 MHz, CDCl<sub>3</sub>) δ 162.8, 141.5, 139.4, 136.3, 135.5, 135.2, 129.0, 128.7, 128.0, 127.1, 123.9, 122.0, 60.8, 14.5. HRMS (ESI, *m/z*) calcd for C<sub>18</sub>H<sub>16</sub>N<sub>2</sub>O<sub>2</sub> [M+H]<sup>+</sup>: 293.1285; found: 293.1289.

**ethyl 1-(4-ethoxyphenyl)-1H-imidazole-4-carboxylate (4j)**

(CAS Number: 1923135-51-6)

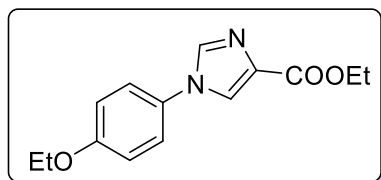

The reaction was performed following the general procedure. The residue was purified by flash column chromatograph (silica gel, petroleum ether:AcOEt = 1:1, v/v) to give the product as a yellow solid (39.0 mg, 75%). <sup>1</sup>H NMR (500 MHz, CDCl<sub>3</sub>) δ 7.86 (d, *J* = 1.2 Hz, 1H), 7.75 (d, *J* = 1.0 Hz, 1H), 7.30 (d, *J* = 8.9 Hz, 2H), 6.98 (d, *J* = 8.9 Hz, 2H), 4.38 (q, *J* = 7.1 Hz, 2H), 4.06 (q, *J* = 7.0 Hz, 2H), 1.41 (dt, 6H). <sup>13</sup>C NMR (125 MHz, CDCl<sub>3</sub>) δ 162.8, 158.9, 136.6, 134.7, 129.5, 124.5, 123.3, 115.6, 63.9, 60.6, 14.7, 14.41.

**ethyl 1-(4-(methylthio)phenyl)-1H-imidazole-4-carboxylate (4k)**

(CAS: 1923054-90-3)

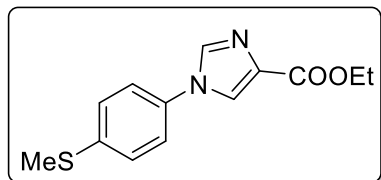

The reaction was performed following the general procedure. The residue was purified by flash column chromatograph (silica gel, petroleum ether:AcOEt = 1:1, v/v) to give the product as a yellow solid (36.7 mg, 70%). <sup>1</sup>H NMR (500 MHz, CDCl<sub>3</sub>) δ 7.91 (d, *J* = 1.3 Hz, 1H), 7.81 (d, *J* = 1.1 Hz, 1H), 7.34 (m, 4H), 4.40 (q, *J* = 7.1 Hz, 2H), 2.52 (s, 3H), 1.40 (t, *J* = 7.1 Hz, 3H). <sup>13</sup>C NMR (125 MHz, CDCl<sub>3</sub>) δ 162.7, 139.7, 136.3, 135.1, 133.5, 127.5, 124.0, 122.2, 60.8, 15.7, 14.4.

**ethyl 1-(4-phenoxyphenyl)-1H-imidazole-4-carboxylate (4l)**

(CAS Number: 124457-50-7)

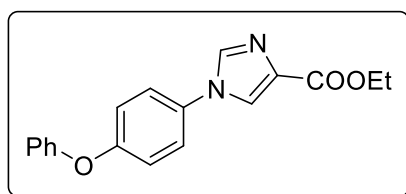

The reaction was performed following the general procedure. The residue was purified by flash column chromatograph (silica gel, petroleum ether:AcOEt = 1:1, v/v) to give the product as a yellow solid (49.3 mg, 80%). <sup>1</sup>H NMR (500 MHz, CDCl<sub>3</sub>) δ 7.89 (d, *J* = 1.4 Hz, 1H), 7.79 (d, *J* = 1.3 Hz, 1H), 7.36 (m, 4H), 7.16 (t, *J* = 7.4 Hz, 1H), 7.09 (m, 2H), 7.04 (m, 2H), 4.39 (q, *J* = 7.1 Hz, 2H), 1.39 (t, *J* = 7.1 Hz, 3H). <sup>13</sup>C NMR (125 MHz, CDCl<sub>3</sub>) δ 162.8,

157.7, 156.2, 136.5, 135.0, 131.5, 130.1, 124.3, 124.3, 123.5, 119.6, 199.5, 60.8, 14.4.

**ethyl 1-(4-(piperidin-1-yl)phenyl)-1H-imidazole-4-carboxylate (4m)**

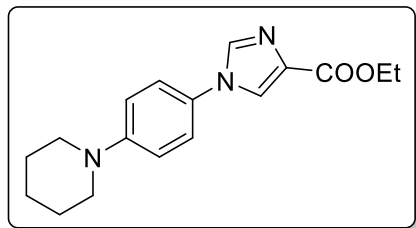

The reaction was performed following the general procedure. The residue was purified by flash column chromatograph (silica gel, petroleum ether:AcOEt = 1:1, v/v) to give the product as a yellow solid (40.1 mg, 67%). <sup>1</sup>H NMR (500 MHz, CDCl<sub>3</sub>) δ 7.86 (d, *J* = 1.3 Hz, 1H), 7.75 (d, *J* =

1.3 Hz, 1H), 7.24 (d, *J* = 9.0 Hz, 2H), 6.97 (d, *J* = 9.0 Hz, 2H), 4.39 (q, *J* = 7.1 Hz, 2H), 3.21 (m, 4H), 1.71 (dt, *J* = 11.2, 5.7 Hz, 5H), 1.62 (m, 2H), 1.40 (t, *J* = 7.1 Hz, 3H). <sup>13</sup>C NMR (125 MHz, CDCl<sub>3</sub>) δ 162.9, 151.9, 136.5, 134.4, 127.5, 124.4, 122.8, 116.6, 60.6, 50.1, 25.5, 24.2, 14.4. HRMS (ESI, *m/z*) calcd for C<sub>17</sub>H<sub>21</sub>N<sub>3</sub>O<sub>2</sub> [M+H]<sup>+</sup>: 300.1707; found: 300.1706.

**ethyl 1-(4-cyanophenyl)-1H-imidazole-4-carboxylate (4n)**

(CAS Number: 910126-73-7)

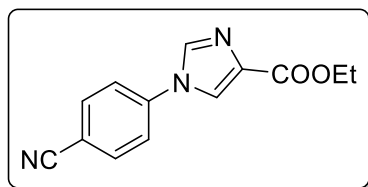

The reaction was performed following the general procedure. The residue was purified by flash column chromatograph (silica gel, petroleum ether:AcOEt = 1:2, v/v) to give the product as a yellow solid (28.9 mg, 60%). <sup>1</sup>H NMR (500 MHz, CDCl<sub>3</sub>) δ 8.03 (s, 1H), 7.97 (s, 1H), 7.85 (d, *J* = 8.5 Hz, 2H), 7.61 (d, *J* = 8.5 Hz, 2H), 4.40 (q, *J* = 7.1 Hz, 3H), 1.40 (t, *J* = 7.1 Hz, 5H). <sup>13</sup>C NMR (125 MHz, CDCl<sub>3</sub>) δ 162.3, 139.6, 136.0 (d, *J* = 13.6 Hz), 134.3, 123.2, 121.8, 117.5, 112.2, 61.0, 14.4.

**ethyl 1-(4-nitrophenyl)-1H-imidazole-4-carboxylate (4o)**

(CAS Number: 197079-06-4)

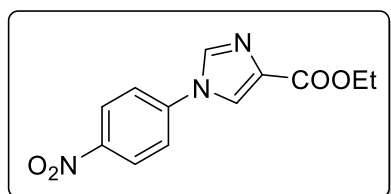

The reaction was performed following the general procedure. The residue was purified by flash column chromatograph (silica gel, petroleum ether:AcOEt = 1:2, v/v) to give the product as a yellow solid (31.8 mg, 61%). <sup>1</sup>H NMR (500 MHz, CDCl<sub>3</sub>) δ 8.01 (s, 1H), 7.92 (s, 1H), 7.70 (d, *J* = 7.4

Hz, 2H), 7.65 (d, *J* = 7.6 Hz, 1H), 4.42 (q, *J* = 7.2 Hz, 2H), 1.42 (t, *J* = 7.1 Hz, 3H). <sup>13</sup>C NMR (125 MHz, CDCl<sub>3</sub>) δ 162.3, 147.0, 141.0, 136.2, 136.0, 125.9, 123.2, 121.7, 61.1, 14.4.

**ethyl 1-(4-acetylphenyl)-1H-imidazole-4-carboxylate (4p)**

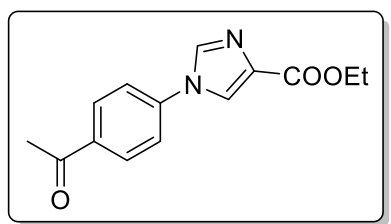

The reaction was performed following the general procedure. The residue was purified by flash column chromatograph (silica gel, petroleum ether:AcOEt = 1:2, v/v) to give the product as a yellow solid (26.8 mg, 52%). <sup>1</sup>H NMR (500 MHz, CDCl<sub>3</sub>) δ 8.10 (d, *J* = 8.6 Hz, 2H), 8.01 (d, *J* = 1.4 Hz, 1H), 7.94 (d, *J* =

1.4 Hz, 1H), 7.53 (d, *J* = 8.6 Hz, 2H), 4.39 (q, *J* = 7.1 Hz, 2H), 2.64 (s, 3H), 1.40 (t, *J* = 7.1 Hz, 3H). <sup>13</sup>C NMR (125 MHz, CDCl<sub>3</sub>) δ 196.4, 162.5, 139.8, 136.6, 136.0,

135.7, 130.5, 123.4, 121.2, 61.0, 26.7, 14.4. HRMS (ESI,  $m/z$ ) calcd for  $C_{14}H_{14}N_2O_3$   $[M+H]^+$ : 259.1077; found: 259.1079.

**ethyl 1-(4-(cyanomethyl)phenyl)-1H-imidazole-4-carboxylate (4q)**

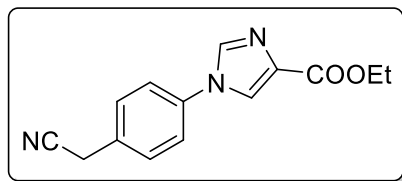

The reaction was performed following the general procedure. The residue was purified by flash column chromatograph (silica gel, petroleum ether:AcOEt = 1:2, v/v) to give the product as a yellow solid (24.5 mg, 48%).  $^1H$  NMR (500 MHz,  $CDCl_3$ )  $\delta$  7.94 (d,  $J$  = 1.3 Hz, 1H), 7.86 (d,  $J$  = 1.2 Hz, 1H), 7.49 (d,  $J$  = 8.5 Hz, 2H), 7.44 (m, 2H), 4.38 (q,  $J$  = 7.1 Hz, 2H), 3.83 (s, 2H), 1.39 (t,  $J$  = 7.1 Hz, 3H).  $^{13}C$  NMR (125 MHz,  $CDCl_3$ )  $\delta$  162.6, 136.3, 136.2, 135.4, 130.4, 129.8, 123.8, 122.3, 117.2, 60.9, 23.3, 14.4. HRMS (ESI,  $m/z$ ) calcd for  $C_{14}H_{13}N_3O_2$   $[M+H]^+$ : 256.1081; found: 256.1085.

**ethyl 1-(4-(ethoxycarbonyl)phenyl)-1H-imidazole-4-carboxylate (4r)**

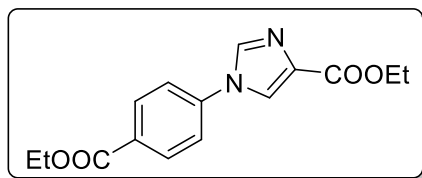

The reaction was performed following the general procedure. The residue was purified by flash column chromatograph (silica gel, petroleum ether:AcOEt = 1:2, v/v) to give the product as a yellow solid (31.7 mg, 55%).  $^1H$  NMR (500 MHz,  $CDCl_3$ )  $\delta$  8.18 (d,  $J$  = 8.7 Hz, 1H), 8.00 (d,  $J$  = 1.4 Hz, 1H), 7.93 (d,  $J$  = 1.4 Hz, 1H), 7.49 (d,  $J$  = 8.7 Hz, 1H), 4.39 (qd,  $J$  = 7.1, 3.4 Hz, 1H), 1.40 (td,  $J$  = 7.1, 5.5 Hz, 2H).  $^{13}C$  NMR (125 MHz,  $CDCl_3$ )  $\delta$  165.3, 162.5, 139.7, 136.0, 135.6, 131.7, 130.3, 123.5, 121.0, 61.5, 60.9, 14.4, 14.3. HRMS (ESI,  $m/z$ ) calcd for  $C_{15}H_{16}N_2O_4$   $[M+H]^+$ : 289.1183; found: 289.1181.

**ethyl 1-(3-fluorophenyl)-1H-imidazole-4-carboxylate (4s)**

(CAS Number: 1260654-52-1)

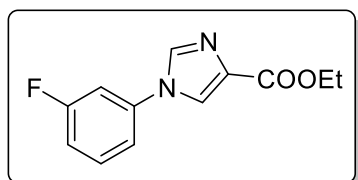

The reaction was performed following the general procedure. The residue was purified by flash column chromatograph (silica gel, petroleum ether:AcOEt = 1:1, v/v) to give the product as a yellow solid (23.4 mg, 50%).  $^1H$  NMR (500 MHz,  $CDCl_3$ )  $\delta$  7.94 (d,  $J$  = 1.2 Hz, 1H), 7.86 (d,  $J$  = 1.1 Hz, 1H), 7.49 (td,  $J$  = 8.1, 6.1 Hz, 1H), 7.22 (dd,  $J$  = 8.0, 1.5 Hz, 1H), 7.14 (m, 2H), 4.39 (q,  $J$  = 7.1 Hz, 2H), 1.39 (t,  $J$  = 7.1 Hz, 3H).  $^{13}C$  NMR (125 MHz,  $CDCl_3$ )  $\delta$  163.2 (d,  $J$  = 248.3 Hz), 162.5, 137.7 (d,  $J$  = 9.6 Hz), 136.1, 135.4, 131.6 (d,  $J$  = 9.1 Hz), 123.7, 117.2 (d,  $J$  = 3.2 Hz), 115.4 (d,  $J$  = 20.8 Hz), 109.4 (d,  $J$  = 25.0 Hz), 60.9, 14.4.

**ethyl 1-(2-(trifluoromethyl)phenyl)-1H-imidazole-4-carboxylate (4t)**

(CAS Number: 2111149-39-2)

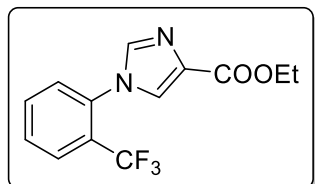

The reaction was performed following the general procedure. The residue was purified by flash column chromatograph (silica gel, petroleum ether:AcOEt = 1:1, v/v) to give the product as a yellow solid (29.5 mg, 52%).  $^1H$  NMR (500 MHz,  $CDCl_3$ )  $\delta$  8.01 (s, 1H), 7.92 (s, 1H), 7.70 (d,  $J$  = 7.4 Hz, 2H), 7.65 (d,  $J$  = 7.6 Hz, 1H), 4.42 (q,  $J$  = 7.2 Hz, 2H), 1.42 (t,  $J$

= 7.1 Hz, 3H).  $^{13}\text{C}$  NMR (125 MHz,  $\text{CDCl}_3$ )  $\delta$  162.5, 136.9, 136.2, 135.7, 132.8 (q,  $J$  = 33.2 Hz), 131.0, 125.2 (q,  $J$  = 7.4, 3.7 Hz), 124.9, 124.3, 123.7, 122.1, 118.6 (q,  $J$  = 3.8 Hz), 60.9, 14.4.

**ethyl 1-(3,4-dimethylphenyl)-1H-imidazole-4-carboxylate (4u)**

(CAS Number: 1983822-50-9)

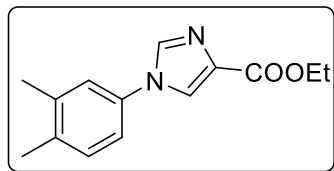

The reaction was performed following the general procedure. The residue was purified by flash column chromatograph (silica gel, petroleum ether:AcOEt = 1:1, v/v) to give the product as a yellow solid (39.5 mg, 81%).  $^1\text{H}$  NMR (500 MHz,  $\text{CDCl}_3$ )  $\delta$  7.89 (d,  $J$  = 1.3 Hz, 1H), 7.79 (d,  $J$  = 1.1 Hz, 1H), 7.21 (d,  $J$  = 8.0 Hz, 1H), 7.15 (s, 1H), 7.10 (dd,  $J$  = 8.0, 2.0 Hz, 1H), 4.37 (q,  $J$  = 7.1 Hz, 2H), 2.29 (d,  $J$  = 9.4 Hz, 6H), 1.38 (t,  $J$  = 7.1 Hz, 3H).  $^{13}\text{C}$  NMR (125 MHz,  $\text{CDCl}_3$ )  $\delta$  162.8, 138.7, 137.2, 136.3, 134.7, 134.3, 130.9, 124.1, 122.8, 118.9, 60.7, 19.9, 19.4, 14.4.

**ethyl 1-benzyl-1H-imidazole-4-carboxylate (4v) (CAS Number: 76075-03-1)**

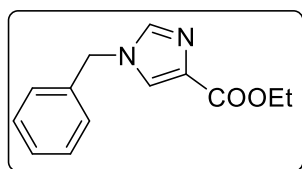

The reaction was performed following the general procedure. The residue was purified by flash column chromatograph (silica gel, petroleum ether:AcOEt = 1:1, v/v) to give the product as a yellow liquid (18.9 mg, 41%).  $^1\text{H}$  NMR (500 MHz,  $\text{CDCl}_3$ )  $\delta$  7.57 (d,  $J$  = 1.1 Hz, 1H), 7.55 (s, 1H), 7.36 (d,  $J$  = 6.8 Hz, 2H), 7.17 (d,  $J$  = 7.5 Hz, 2H), 5.12 (s, 2H), 4.33 (q,  $J$  = 7.1 Hz, 2H), 1.35 (t,  $J$  = 7.1 Hz, 3H).  $^{13}\text{C}$  NMR (125 MHz,  $\text{CDCl}_3$ )  $\delta$  162.8, 138.1, 135.0, 134.4, 129.2, 128.7, 127.5, 125.3, 60.6, 51.4, 14.4.

**ethyl 1-(naphthalen-2-yl)-1H-imidazole-4-carboxylate (4w)**

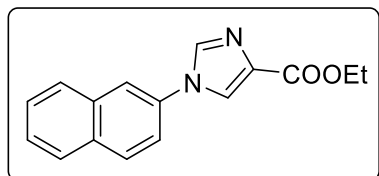

The reaction was performed following the general procedure. The residue was purified by flash column chromatograph (silica gel, petroleum ether:AcOEt = 1:1, v/v) to give the product as a yellow liquid (35.6 mg, 67%).  $^1\text{H}$  NMR (500 MHz,  $\text{CDCl}_3$ )  $\delta$  8.06 (d,  $J$  = 1.1 Hz, 1H), 7.97 (d,  $J$  = 8.6 Hz, 2H), 7.88 (t,  $J$  = 8.4 Hz, 2H), 7.84 (d,  $J$  = 1.9 Hz, 1H), 7.57 (m, 2H), 7.51 (dd,  $J$  = 8.7, 2.2 Hz, 1H), 4.41 (q,  $J$  = 7.1 Hz, 2H), 1.41 (t,  $J$  = 7.1 Hz, 3H).  $^{13}\text{C}$  NMR (125 MHz,  $\text{CDCl}_3$ )  $\delta$  162.8, 136.5, 135.2, 133.8, 133.4, 132.6, 130.5, 128.0, 127.9, 127.7, 127.0, 124.2, 119.9, 119.7, 60.8, 14.5. HRMS (ESI,  $m/z$ ) calcd for  $\text{C}_{16}\text{H}_{14}\text{N}_2\text{O}_2$   $[\text{M}+\text{H}]^+$ : 267.1128; found: 267.1129.

**ethyl 1-(pyren-4-yl)-1H-imidazole-4-carboxylate (4x)**

(CAS Number: 2107665-94-9)

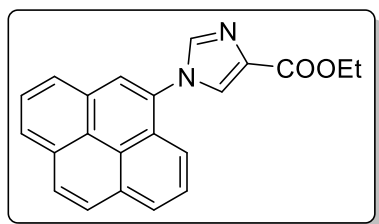

The reaction was performed following the general procedure. The residue was purified by flash column chromatograph (silica gel, petroleum ether:AcOEt = 2:1, v/v) to give the product as a yellow liquid (44.2 mg, 65%).  $^1\text{H}$  NMR (500 MHz,  $\text{CDCl}_3$ )  $\delta$  8.26 (d,  $J$  = 7.6 Hz, 1H), 8.23 – 8.19 (m, 2H), 8.15 (d,  $J$  = 8.9 Hz, 1H), 8.12 – 8.02 (m, 4H), 7.92 – 7.86 (m, 2H), 7.72 (d,  $J$  = 9.2 Hz, 1H), 4.47 (q,  $J$  = 7.1 Hz, 2H), 1.45 (t,  $J$  = 7.1 Hz, 3H).  $^{13}\text{C}$  NMR (126 MHz,  $\text{CDCl}_3$ )  $\delta$  163.0, 139.5,

134.7, 131.9, 131.1, 130.6, 129.9, 129.6, 128.9, 127.7, 126.9, 126.9, 126.6, 126.5, 126.1, 124.8, 124.1, 123.6, 120.4, 60.9, 14.5. HRMS (ESI,  $m/z$ ) calcd for  $C_{22}H_{16}N_2O_2$   $[M+H]^+$ : 341.1285; found: 341.1288.

**ethyl 1-(2-methyl-1*H*-indol-5-yl)-1*H*-imidazole-4-carboxylate (4y)**

(CAS Number: 2107665-94-9)

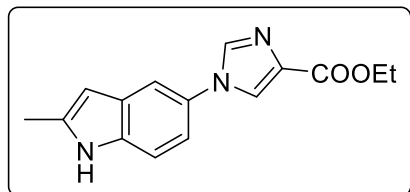

The reaction was performed following the general procedure. The residue was purified by flash column chromatograph (silica gel, petroleum ether:AcOEt = 1:3, v/v) to give the product as a yellow solid (32.8 mg, 61%).  $^1H$  NMR (500 MHz, DMSO)  $\delta$  11.21 (s, 1H), 8.30 (d,  $J$  = 1.4 Hz, 1H), 8.23 (d,  $J$  = 1.4 Hz, 1H), 7.68 (d,  $J$  = 2.1 Hz, 1H), 7.39 (d,  $J$  = 8.5 Hz, 1H), 7.27 (dd,  $J$  = 8.6, 2.2 Hz, 1H), 6.21 (m, 1H), 4.26 (q,  $J$  = 7.1 Hz, 2H), 2.41 (s, 3H), 1.30 (t,  $J$  = 7.1 Hz, 3H).  $^{13}C$  NMR (125 MHz, DMSO)  $\delta$  162.8, 138.5, 137.8, 135.7, 133.7, 129.4, 128.9, 125.4, 114.5, 112.2, 111.8, 100.2, 60.1, 14.8, 13.9.

**ethyl 1-(benzo[*d*]thiazol-6-yl)-1*H*-imidazole-4-carboxylate (4z)**

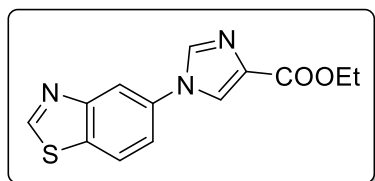

The reaction was performed following the general procedure. The residue was purified by flash column chromatograph (silica gel, petroleum ether:AcOEt = 1:2, v/v) to give the product as a yellow solid (21.8 mg, 40%).  $^1H$  NMR (500 MHz,  $CDCl_3$ )  $\delta$  9.14 (s, 1H), 8.19 (d,  $J$  = 2.1 Hz, 1H), 8.10 (d,  $J$  = 8.6 Hz, 1H), 8.04 (d,  $J$  = 1.4 Hz, 1H), 7.94 (d,  $J$  = 1.3 Hz, 1H), 7.52 (dd,  $J$  = 8.5, 2.1 Hz, 1H), 4.41 (q,  $J$  = 7.1 Hz, 2H), 1.41 (t,  $J$  = 7.1 Hz, 3H).  $^{13}C$  NMR (125 MHz,  $CDCl_3$ )  $\delta$  162.7, 156.9, 154.0, 136.6, 135.4, 135.1, 133.7, 124.3, 123.5, 119.6, 116.7, 60.9, 14.4. HRMS (ESI,  $m/z$ ) calcd for  $C_{13}H_{11}N_3O_2S$   $[M+H]^+$ : 274.0645; found: 274.0639.

**ethyl 1-(9-ethyl-9*H*-carbazol-3-yl)-1*H*-imidazole-4-carboxylate (4aa)**

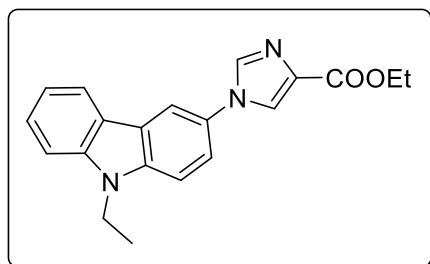

The reaction was performed following the general procedure. The residue was purified by flash column chromatograph (silica gel, petroleum ether:AcOEt = 1:1, v/v) to give the product as a yellow liquid (53.9 mg, 81%).  $^1H$  NMR (500 MHz,  $CDCl_3$ )  $\delta$  8.09 (d,  $J$  = 7.8 Hz, 1H), 8.07 (d,  $J$  = 1.9 Hz, 1H), 8.01 (d,  $J$  = 1.0 Hz, 1H), 7.89 (d,  $J$  = 1.0 Hz, 1H), 7.53 (t,  $J$  = 7.7 Hz, 1H), 7.46 (m, 3H), 7.28 (t,  $J$  = 7.5 Hz, 1H), 4.41 (dq,  $J$  = 10.8, 7.2 Hz, 4H), 1.44 (dt,  $J$  = 14.2, 7.2 Hz, 6H).  $^{13}C$  NMR (125 MHz,  $CDCl_3$ )  $\delta$  163.0, 140.8, 139.3, 137.2, 134.6, 128.5, 126.9, 125.2, 123.5, 122.2, 120.8, 120.1, 119.6, 114.4, 109.4, 109.0, 60.7, 37.9, 14.5, 13.8. HRMS (ESI,  $m/z$ ) calcd for  $C_{20}H_{19}N_3O_2$   $[M+H]^+$ : 334.1550; found: 334.1552.

**methyl 1-(3,4-dimethylphenyl)-1*H*-imidazole-4-carboxylate (4ab)**

The reaction was performed following the general procedure. The residue was purified by flash column chromatograph (silica gel, petroleum ether:AcOEt = 1:1, v/v) to give the product as a yellow solid (32.2 mg, 70%).  $^1H$  NMR (500 MHz,



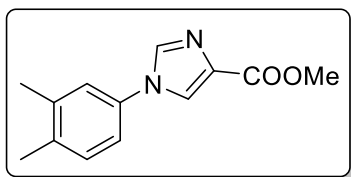

CDCl<sub>3</sub>)  $\delta$  7.90 (d,  $J$  = 1.3 Hz, 1H), 7.79 (d,  $J$  = 1.3 Hz, 1H), 7.22 (d,  $J$  = 8.0 Hz, 1H), 7.15 (d,  $J$  = 1.8 Hz, 1H), 7.10 (dd,  $J$  = 8.0, 2.2 Hz, 1H), 3.89 (d,  $J$  = 7.5 Hz, 3H), 2.30 (s, 2H), 2.28 (s, 2H). <sup>13</sup>C NMR (125 MHz, CDCl<sub>3</sub>)  $\delta$  163.2, 138.8, 137.2, 136.4, 134.4, 134.2, 131.0, 124.2, 122.8, 118.9, 51.8, 19.9, 19.4. HRMS (ESI,  $m/z$ ) calcd for C<sub>13</sub>H<sub>14</sub>N<sub>2</sub>O<sub>2</sub> [M+H]<sup>+</sup>: 231.1128; found: 231.1126.

#### 1-(*p*-tolyl)-1*H*-tetrazole (6a) (CAS Number: 25109-04-0)

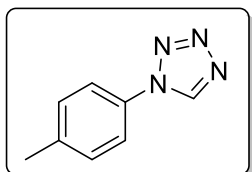

The reaction was performed following the general procedure. The residue was purified by flash column chromatograph (silica gel, petroleum ether:AcOEt = 3:1, v/v) to give the product as a yellow solid (27.0 mg, 78%), <sup>1</sup>H NMR (500 MHz, CDCl<sub>3</sub>)  $\delta$  8.96 (s, 1H), 7.57 (d,  $J$  = 8.4 Hz, 2H), 7.37 (d,  $J$  = 8.5 Hz, 2H), 2.45 (s, 3H). <sup>13</sup>C NMR (125 MHz, CDCl<sub>3</sub>)  $\delta$  140.5, 140.5, 130.7, 121.1, 21.2.

#### 1-(4-(*tert*-butyl)phenyl)-1*H*-tetrazole (6b) (CAS Number: 1631073-38-5)

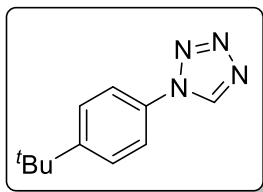

The reaction was performed following the general procedure. The residue was purified by flash column chromatograph (silica gel, petroleum ether:AcOEt = 4:1, v/v) to give the product as a yellow solid (26.3 mg, 65%). <sup>1</sup>H NMR (500 MHz, CDCl<sub>3</sub>)  $\delta$  9.00 (d,  $J$  = 1.2 Hz, 1H), 7.60 (ddd,  $J$  = 19.5, 7.7, 4.4 Hz, 4H), 1.36 (s, 9H). <sup>13</sup>C NMR (125 MHz, CDCl<sub>3</sub>)  $\delta$  153.6, 140.6, 131.3, 127.1, 120.9, 35.0, 31.2.

#### 1-(4-isopropylphenyl)-1*H*-tetrazole (6c) (CAS Number: 932034-62-3)

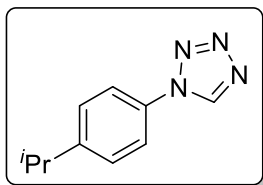

The reaction was performed following the general procedure. The residue was purified by flash column chromatograph (silica gel, petroleum ether:AcOEt = 4:1, v/v) to give the product as a yellow liquid (26.7 mg, 71%). <sup>1</sup>H NMR (500 MHz, CDCl<sub>3</sub>)  $\delta$  8.99 (d,  $J$  = 1.8 Hz, 1H), 7.61 (d,  $J$  = 8.5 Hz, 2H), 7.42 (d,  $J$  = 8.5 Hz, 2H), 3.00 (dt,  $J$  = 13.8, 6.9 Hz, 1H), 1.29 (s, 3H), 1.28 (s, 3H). <sup>13</sup>C NMR (125 MHz, CDCl<sub>3</sub>)  $\delta$  151.3, 140.6, 131.6, 128.2, 121.3, 33.9, 23.8.

#### 1-(4-propylphenyl)-1*H*-tetrazole (6d)

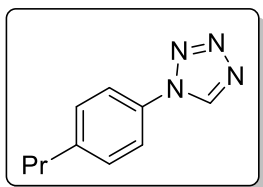

The reaction was performed following the general procedure. The residue was purified by flash column chromatograph (silica gel, petroleum ether:AcOEt = 4:1, v/v) to give the product as a yellow solid (24.4 mg, 65%). <sup>1</sup>H NMR (500 MHz, CDCl<sub>3</sub>)  $\delta$  8.98 (s, 1H), 7.59 (m, 2H), 7.37 (d,  $J$  = 8.5 Hz, 2H), 2.67 (m, 2H), 1.68 (m, 2H), 0.95 (t,  $J$  = 7.3 Hz, 3H). <sup>13</sup>C NMR (125 MHz, CDCl<sub>3</sub>)  $\delta$  145.2, 140.5, 131.6, 130.1, 121.2, 37.6, 24.4, 13.7. HRMS (ESI,  $m/z$ ) calcd for C<sub>10</sub>H<sub>12</sub>N<sub>4</sub> [M+H]<sup>+</sup>: 189.1135; found: 189.1139.

#### 1-([1,1'-biphenyl]-4-yl)-1*H*-tetrazole (6e) (CAS Number: 63472-38-8)

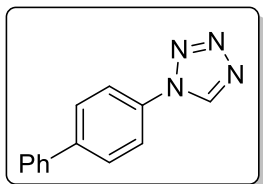

The reaction was performed following the general procedure. The residue was purified by flash column chromatograph (silica gel, petroleum ether:AcOEt = 4:1, v/v) to give the

product as a white solid (29.3 mg, 66%).  $^1\text{H}$  NMR (500 MHz,  $\text{CDCl}_3$ )  $\delta$  9.06 (s, 1H), 7.79 (s, 4H), 7.62 (dq,  $J = 2.6, 1.7$  Hz, 2H), 7.49 (m, 2H), 7.42 (m, 1H).  $^{13}\text{C}$  NMR (125 MHz,  $\text{CDCl}_3$ )  $\delta$  143.2, 140.5, 139.1, 132.8, 129.1, 128.8, 127.2, 121.5.

**1-(4-methoxyphenyl)-1H-tetrazole (6f) (CAS Number: 21788-28-3)**

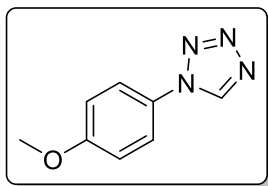

The reaction was performed following the general procedure. The residue was purified by flash column chromatograph (silica gel, petroleum ether:AcOEt = 2:1, v/v) to give the product as a white solid (28.5 mg, 81%).  $^1\text{H}$  NMR (500 MHz,  $\text{CDCl}_3$ )  $\delta$  8.93 (s, 1H), 7.59 (d,  $J = 9.0$  Hz, 2H), 7.05 (d,  $J = 9.0$  Hz, 2H), 3.87 (s, 3H).  $^{13}\text{C}$  NMR (125 MHz,  $\text{CDCl}_3$ )  $\delta$  160.7, 140.7, 123.0, 115.2, 55.8.

**1-(4-(methylthio)phenyl)-1H-tetrazole (6g) (CAS Number: 64022-99-7)**

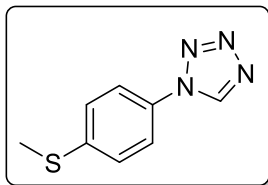

The reaction was performed following the general procedure. The residue was purified by flash column chromatograph (silica gel, petroleum ether:AcOEt = 2:1, v/v) to give the product as a white solid (26.9 mg, 70%).  $^1\text{H}$  NMR (500 MHz,  $\text{CDCl}_3$ )  $\delta$  9.00 (s, 1H), 7.61 (d,  $J = 8.8$  Hz, 2H), 7.38 (d,  $J = 8.7$  Hz, 2H), 2.53 (s, 3H).  $^{13}\text{C}$  NMR (125 MHz,  $\text{CDCl}_3$ )  $\delta$  142.0, 140.4, 130.5, 127.1, 121.6, 15.4.

**1-(4-phenoxyphenyl)-1H-tetrazole (6h) (CAS Number: 330996-10-6)**

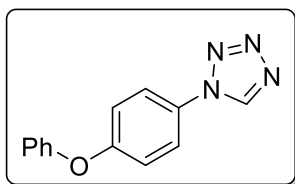

The reaction was performed following the general procedure. The residue was purified by flash column chromatograph (silica gel, petroleum ether:AcOEt = 2:1, v/v) to give the product as a yellow solid (36.2 mg, 76%).  $^1\text{H}$  NMR (500 MHz,  $\text{CDCl}_3$ )  $\delta$  8.96 (s, 1H), 7.63 (d,  $J = 9.0$  Hz, 2H), 7.40 (dd,  $J = 8.5, 7.5$  Hz, 2H), 7.21 (m, 1H), 7.15 (d,  $J = 9.0$  Hz, 2H), 7.07 (m, 2H).  $^{13}\text{C}$  NMR (125 MHz,  $\text{CDCl}_3$ )  $\delta$  159.1, 155.8, 140.6, 130.2, 128.5, 124.6, 123.1, 119.8, 119.3.

**N,N-dimethyl-4-(1H-tetrazol-1-yl)aniline (6i) (CAS Number: 102236-05-5)**

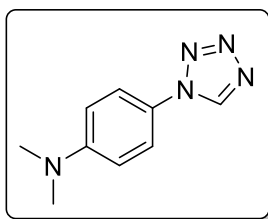

The reaction was performed following the general procedure. The residue was purified by flash column chromatograph (silica gel, petroleum ether:AcOEt = 2:1, v/v) to give the product as a white solid (24.6 mg, 65%).  $^1\text{H}$  NMR (500 MHz,  $\text{CDCl}_3$ )  $\delta$  8.84 (s, 1H), 7.48 (d,  $J = 9.1$  Hz, 2H), 6.77 (d,  $J = 9.1$  Hz, 2H), 3.04 (s, 6H).  $^{13}\text{C}$  NMR (125 MHz,  $\text{CDCl}_3$ )  $\delta$  151.2, 140.5, 122.6, 112.3, 40.4.

**ethyl 4-(1H-tetrazol-1-yl)benzoate (6j) (CAS Number: 1514839-59-8)**

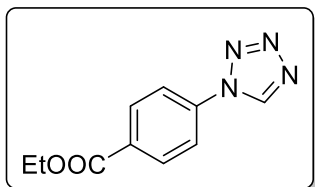

The reaction was performed following the general procedure. The residue was purified by flash column chromatograph (silica gel, petroleum ether:AcOEt = 2:1, v/v) to give the product as a yellow solid (15.7 mg, 36%).  $^1\text{H}$  NMR (500 MHz,  $\text{CDCl}_3$ )  $\delta$  9.09 (s, 1H), 8.27 (d,  $J =$

8.4 Hz, 2H), 7.83 (d,  $J$  = 8.4 Hz, 2H), 4.43 (q,  $J$  = 7.1 Hz, 2H), 1.43 (t,  $J$  = 7.1 Hz, 3H).  $^{13}\text{C}$  NMR (125 MHz,  $\text{CDCl}_3$ )  $\delta$  165.0, 140.4, 136.8, 132.0, 131.7, 120.7, 61.8, 14.3.

**1-(4-bromophenyl)-1H-tetrazole (6k) (CAS Number: 57058-01-2)**

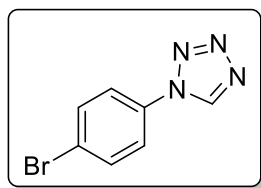

The reaction was performed following the general procedure. The residue was purified by flash column chromatograph (silica gel, petroleum ether:AcOEt = 4:1, v/v) to give the product as a yellow solid (21.1 mg, 47%).  $^1\text{H}$  NMR (500 MHz,  $\text{CDCl}_3$ )  $\delta$  9.01 (s, 1H), 7.73 (m, 2H), 7.62 (m, 2H).  $^{13}\text{C}$  NMR (125 MHz,  $\text{CDCl}_3$ )  $\delta$  140.4, 133.5, 124.0, 122.6.

**1-(4-fluorophenyl)-1H-tetrazole (6l) (CAS Number: 14210-81-2)**

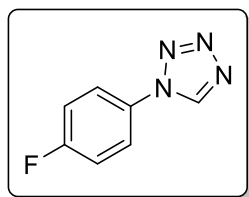

The reaction was performed following the general procedure. The residue was purified by flash column chromatograph (silica gel, petroleum ether:AcOEt = 4:1, v/v) to give the product as a yellow solid (23.9 mg, 73%).  $^1\text{H}$  NMR (500 MHz,  $\text{CDCl}_3$ )  $\delta$  9.01 (s, 1H), 7.71 (dd,  $J$  = 7.9, 3.8 Hz, 2H), 7.29 (t,  $J$  = 8.2 Hz, 2H).  $^{13}\text{C}$  NMR (125 MHz,  $\text{CDCl}_3$ )  $\delta$  163.1 (d,  $J$  = 249.9 Hz), 140.7, 123.0, 123.5 (d,  $J$  = 8.8 Hz), 117.3 (d,  $J$  = 23.4 Hz).

**1-(4-chlorophenyl)-1H-tetrazole (6m) (CAS Number: 25108-32-1)**

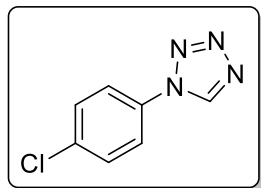

The reaction was performed following the general procedure. The residue was purified by flash column chromatograph (silica gel, petroleum ether:AcOEt = 4:1, v/v) to give the product as a yellow solid (22.4 mg, 62%).  $^1\text{H}$  NMR (500 MHz,  $\text{CDCl}_3$ )  $\delta$  9.00 (s, 1H), 7.68 (d,  $J$  = 8.9 Hz, 2H), 7.57 (d,  $J$  = 8.9 Hz, 2H).  $^{13}\text{C}$  NMR (125 MHz,  $\text{CDCl}_3$ )  $\delta$  141.1, 140.8, 140.0, 127.1, 125.7, 123.4, 122.2, 120.9, 119.9, 119.1, 113.9, 109.4, 109.2, 37.9, 13.8.

**1-(3,4-dimethoxyphenyl)-1H-tetrazole (6n) (CAS Number: 899368-12-8)**

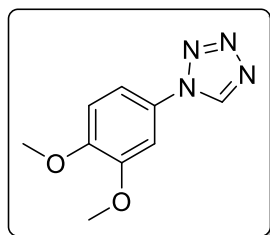

The reaction was performed following the general procedure. The residue was purified by flash column chromatograph (silica gel, petroleum ether:AcOEt = 1:1, v/v) to give the product as a yellow solid (25.1 mg, 61%).  $^1\text{H}$  NMR (500 MHz,  $\text{CDCl}_3$ )  $\delta$  8.95 (s, 1H), 7.24 (d,  $J$  = 2.5 Hz, 1H), 7.17 (dd,  $J$  = 8.6, 2.5 Hz, 1H), 6.98 (d,  $J$  = 8.6 Hz, 1H), 3.95 (d,  $J$  = 5.4 Hz, 6H).  $^{13}\text{C}$  NMR (125 MHz,  $\text{CDCl}_3$ )  $\delta$  150.3, 150.1, 140.7, 127.0, 113.4, 111.3, 105.4, 56.4, 56.3.

**2-methyl-5-(1H-tetrazol-1-yl)-1H-indole (6o)**

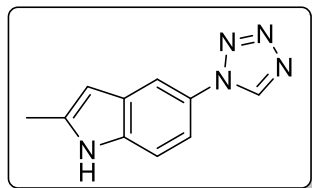

The reaction was performed following the general procedure. The residue was purified by flash column chromatograph (silica gel, petroleum ether:AcOEt = 4:1, v/v) to give the product as a yellow solid (23.9 mg, 60%).  $^1\text{H}$  NMR (500 MHz, DMSO)  $\delta$  11.36 (s, 1H), 9.97 (s, 1H), 7.88 (d,  $J$  = 1.9 Hz, 1H), 7.51 – 7.39 (m, 2H), 6.29 (s, 1H), 2.42 (s, 3H).  $^{13}\text{C}$  NMR (125 MHz, DMSO)  $\delta$  142.7, 139.1, 136.6, 129.1, 126.5, 114.2, 112.5, 111.9, 100.5, 13.9. HRMS (ESI,  $m/z$ ) calcd for  $\text{C}_{10}\text{H}_9\text{N}_5$   $[\text{M}+\text{H}]^+$ : 200.0931; found: 200.0925.

### 1-(naphthalen-2-yl)-1*H*-tetrazole (6p) (CAS Number: 369636-71-5)

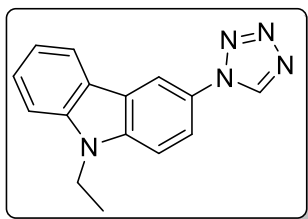

The reaction was performed following the general procedure. The residue was purified by flash column chromatograph (silica gel, petroleum ether:AcOEt = 3:1, v/v) to give the product as a yellow solid (31.6 mg, 60%). <sup>1</sup>H NMR (500 MHz, CDCl<sub>3</sub>) δ 9.14 (s, 1H), 8.17 (s, 1H), 8.05 (d, *J* = 8.8 Hz, 1H), 7.94 (s, 2H), 7.80 (d, *J* = 8.8 Hz, 1H), 7.62 (m, 2H). <sup>13</sup>C NMR (125 MHz, CDCl<sub>3</sub>) δ 140.7, 133.3, 133.1, 131.1, 130.6, 128.4, 128.1, 128.0, 127.8, 119.7, 118.8.

### 1-(naphthalen-2-yl)-1*H*-tetrazole (6q)

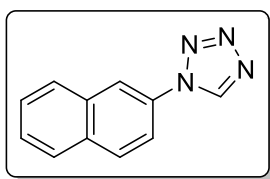

The reaction was performed following the general procedure. The residue was purified by flash column chromatograph (silica gel, petroleum ether:AcOEt = 1:1, v/v) to give the product as a yellow solid (22.0 mg, 56%). <sup>1</sup>H NMR (500 MHz, CDCl<sub>3</sub>) δ 9.13 (s, 1H), 8.18 (d, *J* = 2.1 Hz, 1H), 8.1 (d, *J* = 8.8 Hz, 1H), 8.0 – 7.9 (m, 2H), 7.8 (dd, *J* = 8.8, 2.2 Hz, 1H), 7.7 – 7.6 (m, 2H). <sup>13</sup>C NMR (125 MHz, CDCl<sub>3</sub>) δ 140.7, 133.4, 133.1, 130.7, 128.4, 128.1, 128.0, 127.8, 119.7, 118.8. HRMS (ESI, *m/z*) calcd for C<sub>11</sub>H<sub>8</sub>N<sub>4</sub> [M+H]<sup>+</sup>: 197.0822; found: 197.0826.

### 1-(9*H*-fluoren-9-yl)-1*H*-tetrazole (6r)

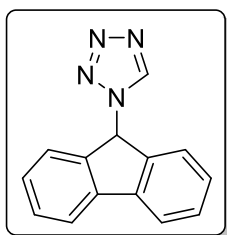

The reaction was performed following the general procedure. The residue was purified by flash column chromatograph (silica gel, petroleum ether:AcOEt = 1:1, v/v) to give the product as a white solid (30.4 mg, 65%). <sup>1</sup>H NMR (500 MHz, CDCl<sub>3</sub>) δ 8.20 (s, 1H), 7.8 (d, *J* = 7.6 Hz, 2H), 7.5 (t, *J* = 7.6 Hz, 2H), 7.5 (dd, *J* = 7.5, 0.5 Hz, 2H), 7.4 (td, *J* = 7.5, 0.9 Hz, 2H), 6.8 (s, 1H). <sup>13</sup>C NMR (125 MHz, CDCl<sub>3</sub>) δ 140.7, 140.6, 139.4, 130.5, 128.7, 125.4, 120.9, 62.7. HRMS (ESI, *m/z*) calcd for C<sub>14</sub>H<sub>10</sub>N<sub>4</sub> [M+H]<sup>+</sup>: 235.0978; found: 235.0981.

### 1-((3*s*,5*s*,7*s*)-adamantan-1-yl)-1*H*-tetrazole (6s) (CAS Number: 50987-38-7)

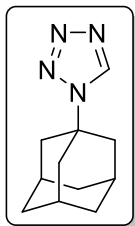

The reaction was performed following the general procedure. The residue was purified by flash column chromatograph (silica gel, petroleum ether:AcOEt = 1:1, v/v) to give the product as a white solid (25.3 mg, 62%). <sup>1</sup>H NMR (500 MHz, CDCl<sub>3</sub>) δ 8.6 (s, 1H), 2.3 (d, *J* = 2.6 Hz, 6H), 1.9 – 1.8 (m, 7H). <sup>13</sup>C NMR (125 MHz, CDCl<sub>3</sub>) δ 139.3, 59.8, 42.8, 35.6, 35.5, 29.3.

### methyl (*E*)-3-(*N*-(9-ethyl-9*H*-carbazol-3-yl)cyanamido)acrylate (7)

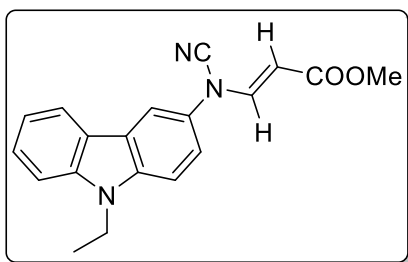

The reaction was performed following the general procedure. The residue was purified by flash column chromatograph (silica gel, petroleum ether:AcOEt = 1:1, v/v) to give the product as a white solid (26.8 mg, 42%). <sup>1</sup>H NMR (500 MHz, CDCl<sub>3</sub>) δ 8.1 (d, *J* = 7.8 Hz, 1H), 8.0 (d, *J* = 2.2 Hz, 1H), 7.6 (d, *J* = 13.6 Hz, 1H), 7.5 (td, *J* = 7.7,

7.2, 1.1 Hz, 1H), 7.5 (d, J = 8.4 Hz, 2H), 7.4 (dd, J = 8.7, 2.3 Hz, 1H), 7.3 (m, 1H), 5.8 (d, J = 13.6 Hz, 1H), 4.4 (q, J = 7.2 Hz, 2H), 3.8 (s, 3H), 1.4 (t, J = 7.3 Hz, 3H).  $^{13}\text{C}$  NMR (125 MHz,  $\text{CDCl}_3$ )  $\delta$  166.8, 143.7, 140.8, 139.0, 129.4, 127.0, 123.8, 122.1, 120.8, 119.8, 119.7, 114.5, 110.1, 109.6, 109.0, 103.2, 51.8, 37.9, 13.8. HRMS (ESI, m/z) calcd for  $\text{C}_{19}\text{H}_{17}\text{N}_3\text{O}_2$   $[\text{M}+\text{H}]^+$ : 319.1312; found: 319.1314.

**6,7-dimethyl-3,4-diphenylquinolin-2-amine (8) (CAS Number: 1638213-25-8)**

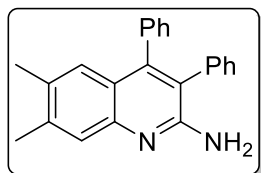

The reaction was performed following the general procedure. The residue was purified by flash column chromatograph (silica gel, petroleum ether:AcOEt = 3:1, v/v) to give the product as a white solid (32.4 mg, 50%).  $^1\text{H}$  NMR (500 MHz,  $\text{CDCl}_3$ )  $\delta$  7.5 (s, 1H), 7.3 – 7.2 (m, 6H), 7.2 – 7.1 (m, 5H), 4.7 (s, 2H), 2.4 (s, 3H), 2.2 (s, 3H).  $^{13}\text{C}$  NMR (125 MHz,  $\text{CDCl}_3$ )  $\delta$  155.0, 147.2, 145.9, 139.5, 137.1, 136.4, 132.0, 130.5, 130.0, 128.6, 127.4, 127.1, 126.1, 125.7, 122.5, 122.1, 20.3, 19.8.

## 7. NMR spectroscopic data

### ethyl 1-phenyl-1*H*-imidazole-4-carboxylate (4a)

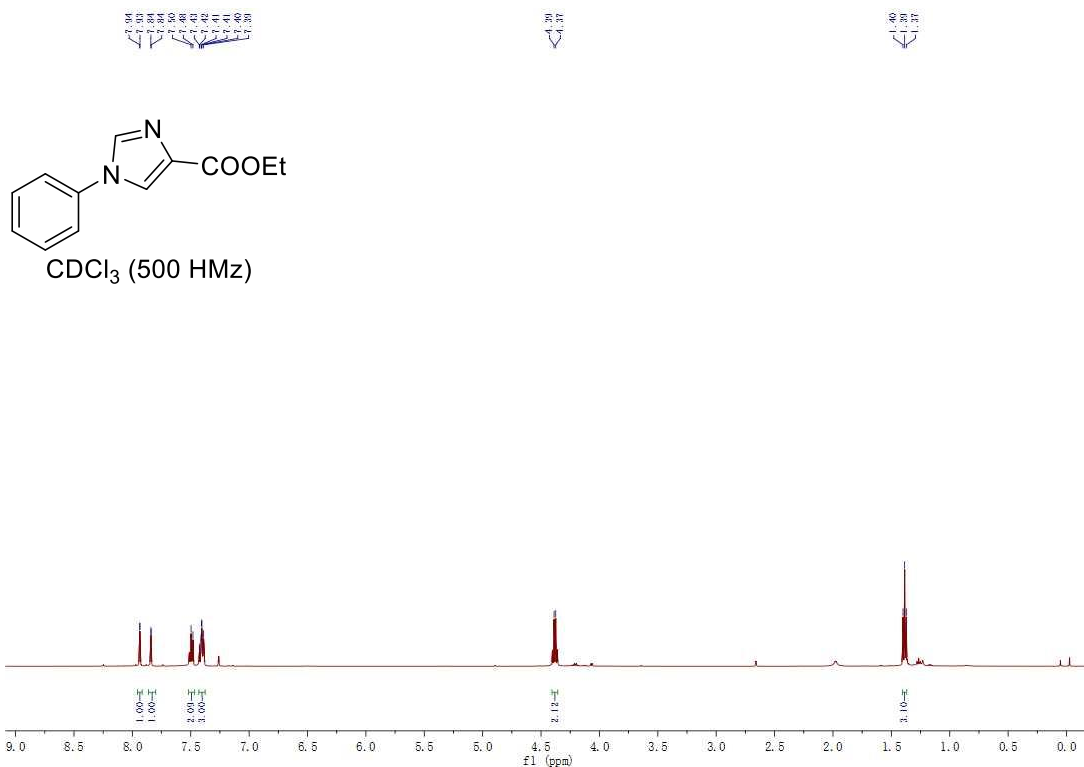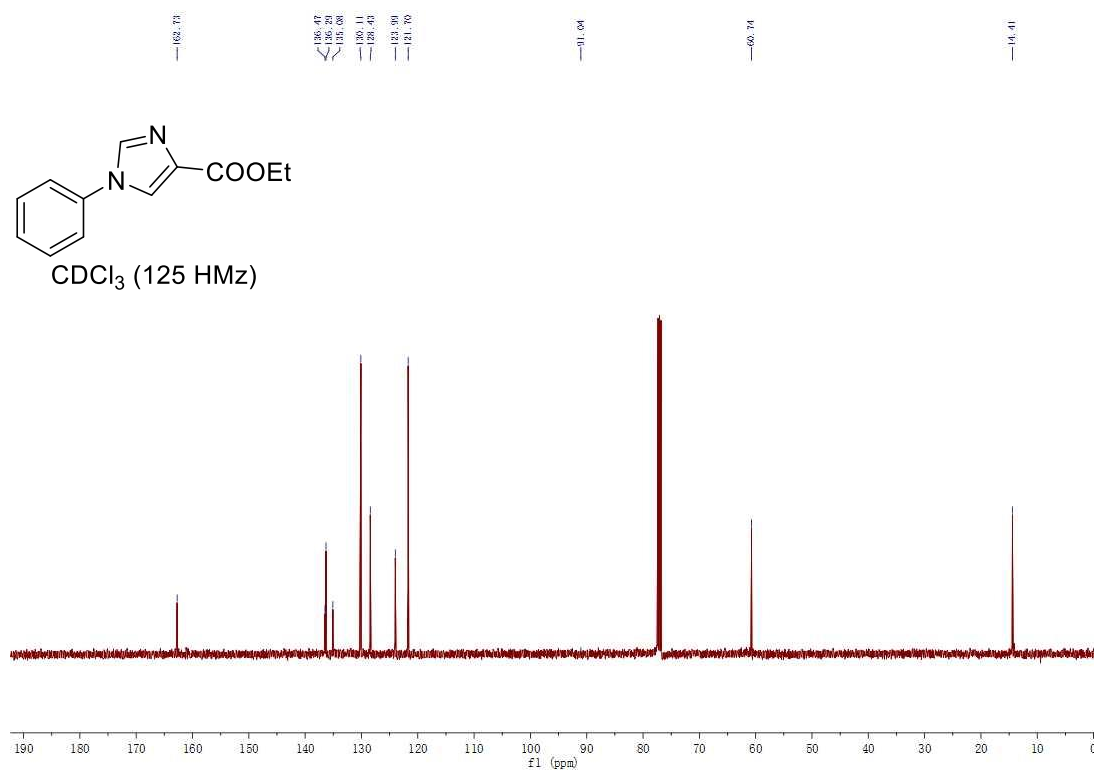

**ethyl 1-(4-fluorophenyl)-1*H*-imidazole-4-carboxylate (4b)**

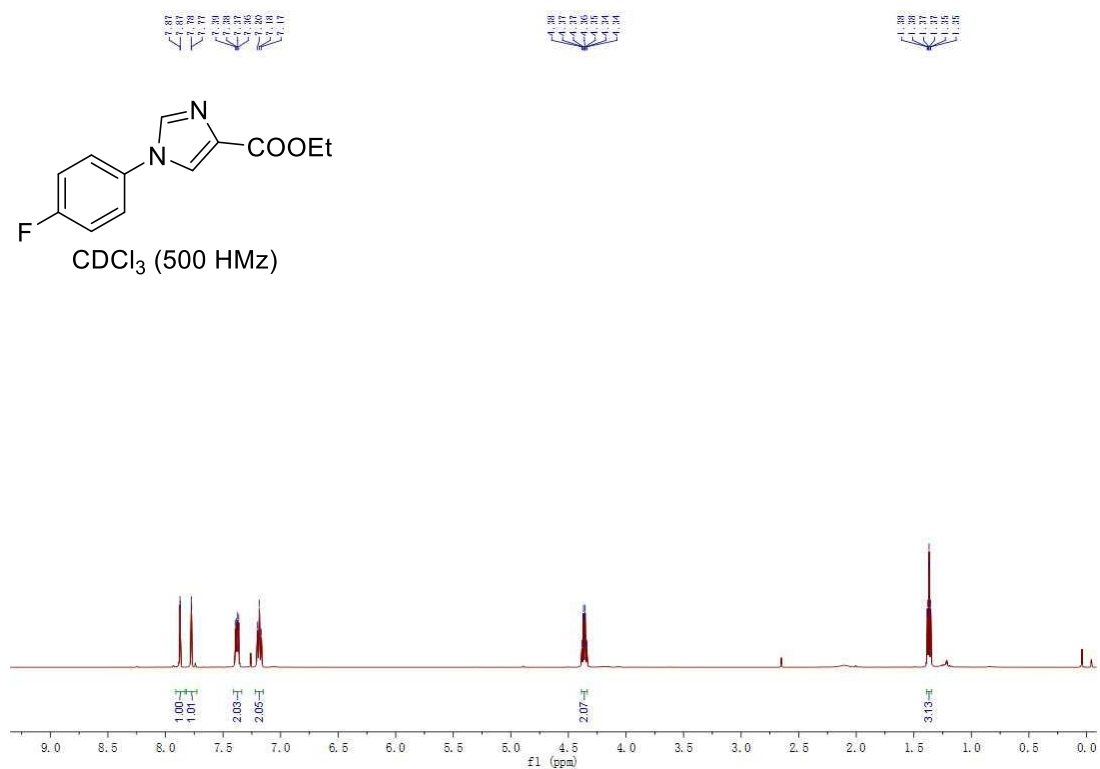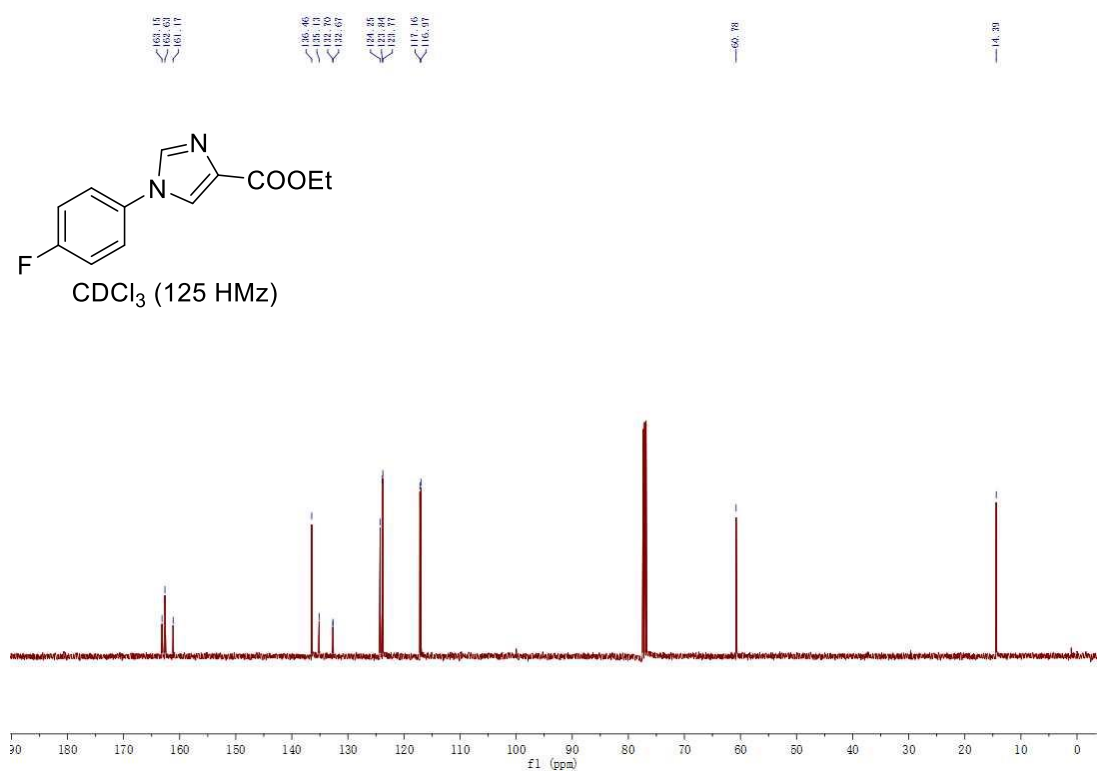

**ethyl 1-(4-chlorophenyl)-1*H*-imidazole-4-carboxylate (4c)**

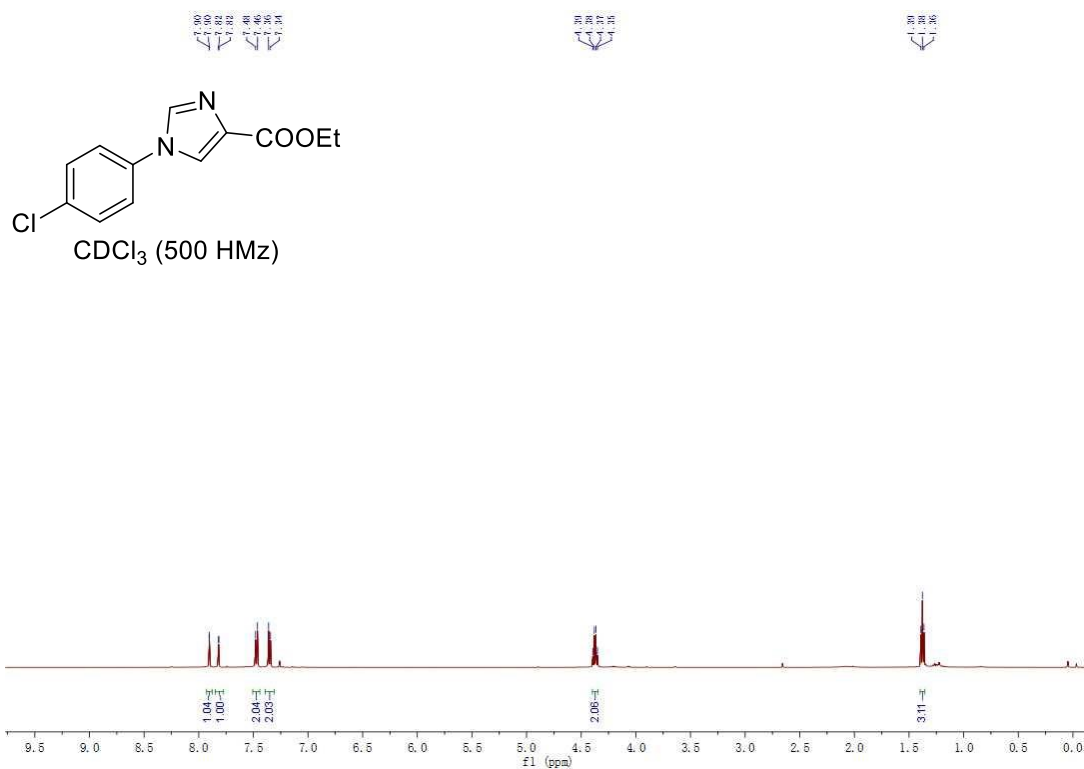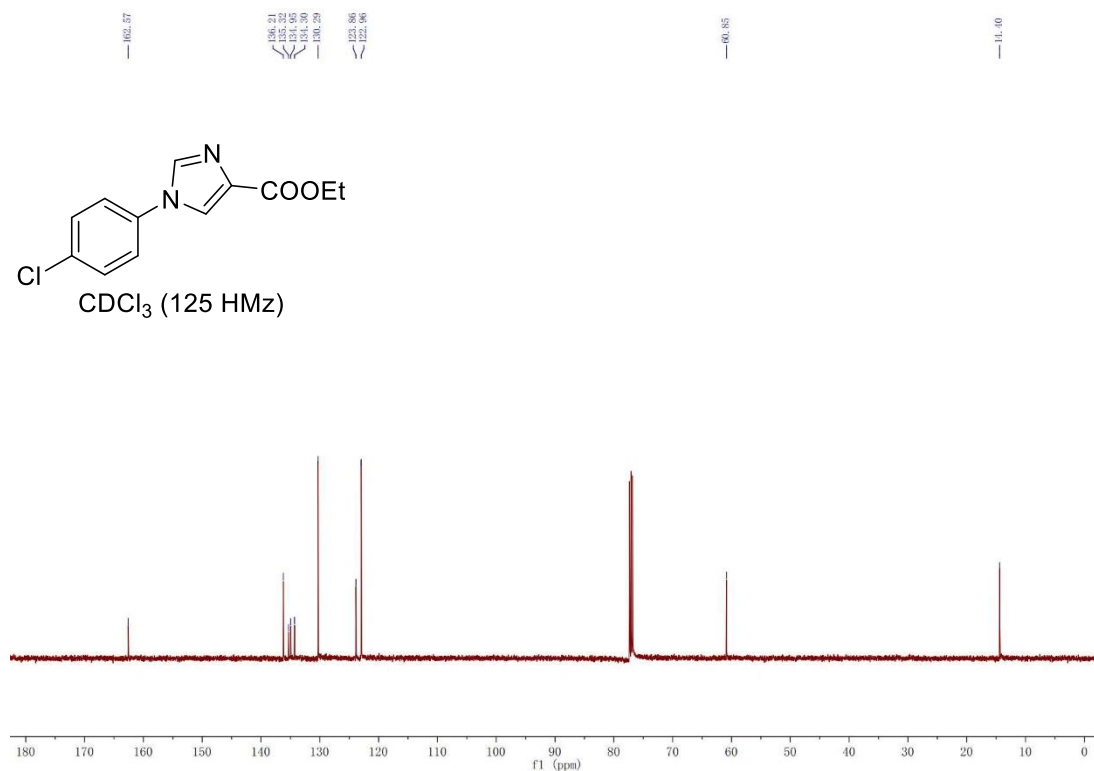



ethyl 1-(4-bromophenyl)-1*H*-imidazole-4-carboxylate (4d)

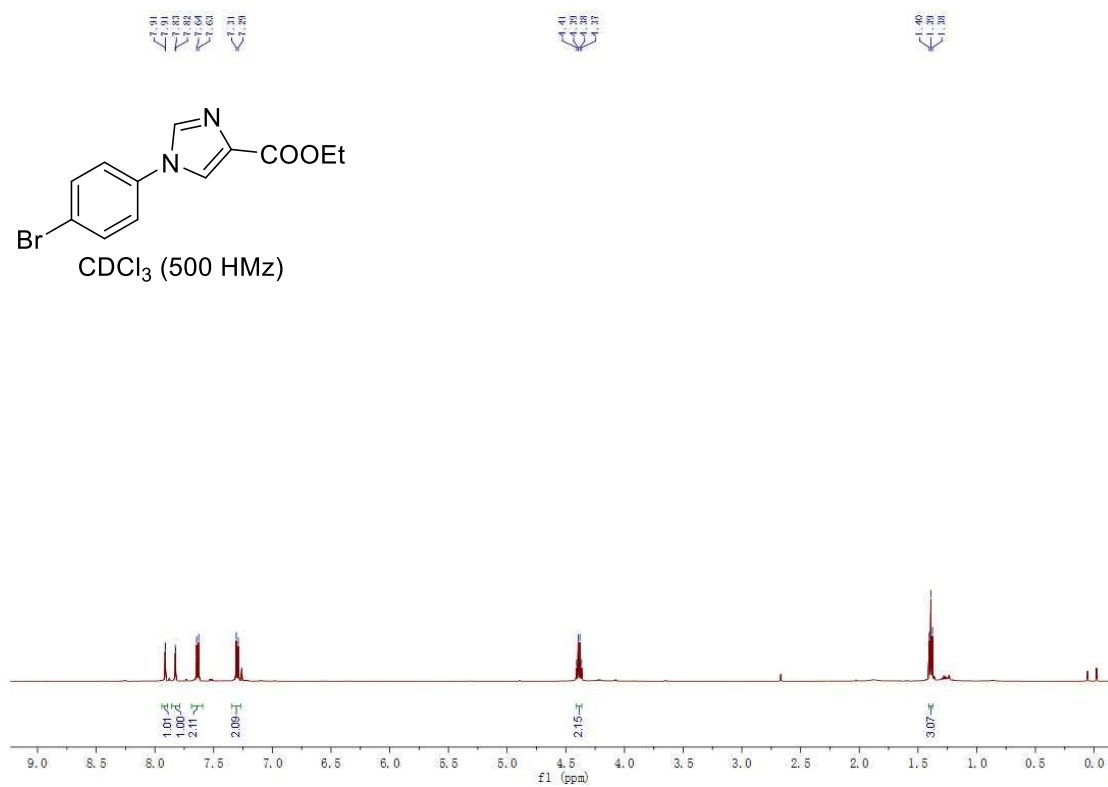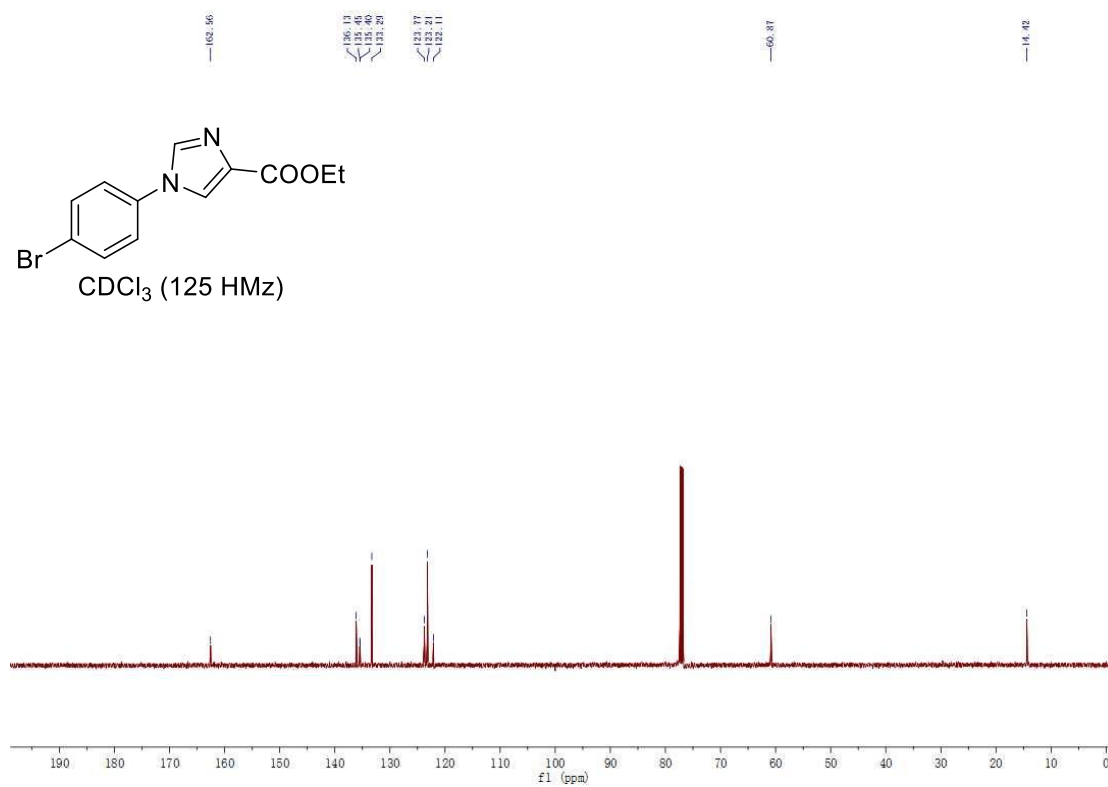

ethyl 1-(*p*-tolyl)-1*H*-imidazole-4-carboxylate (4e)

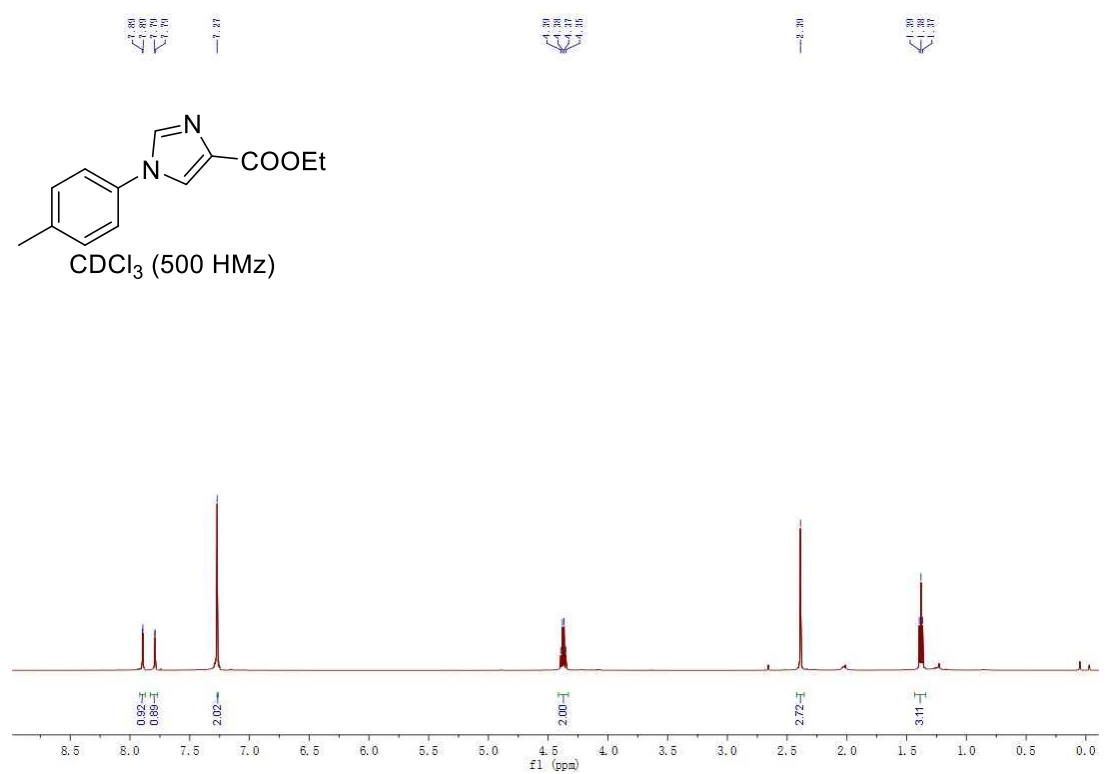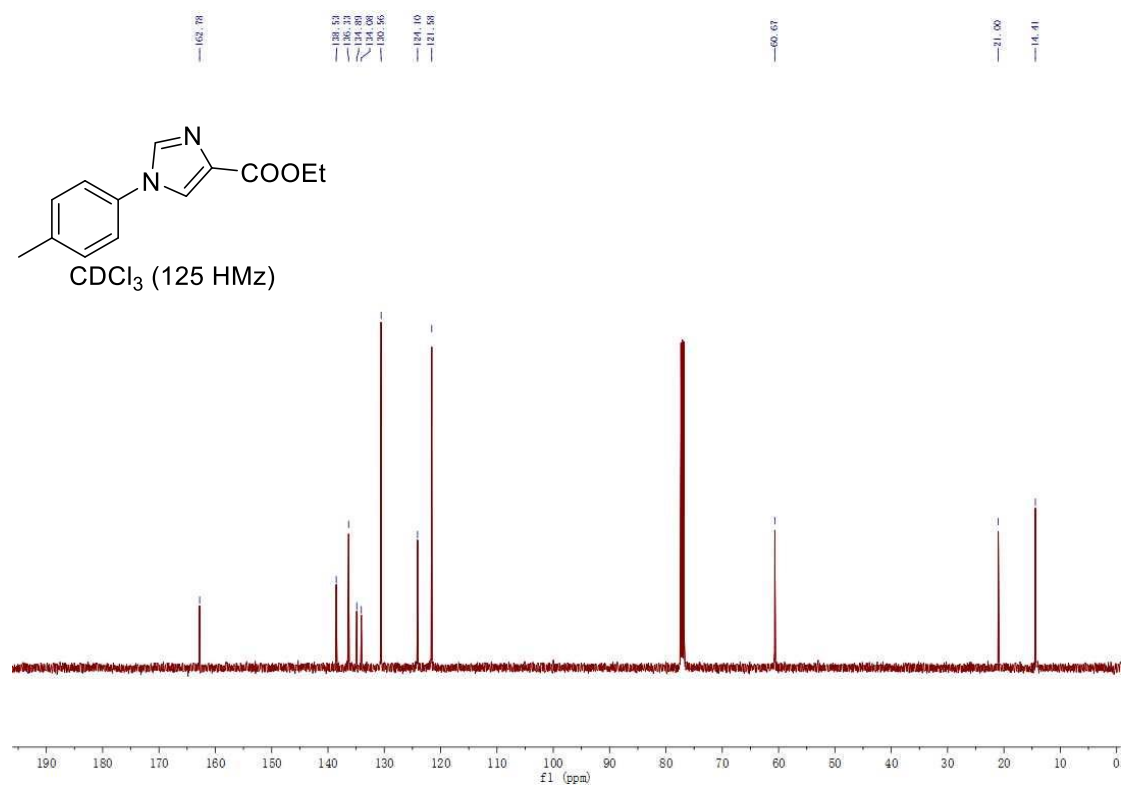

ethyl 1-(4-propylphenyl)-1*H*-imidazole-4-carboxylate (4f)

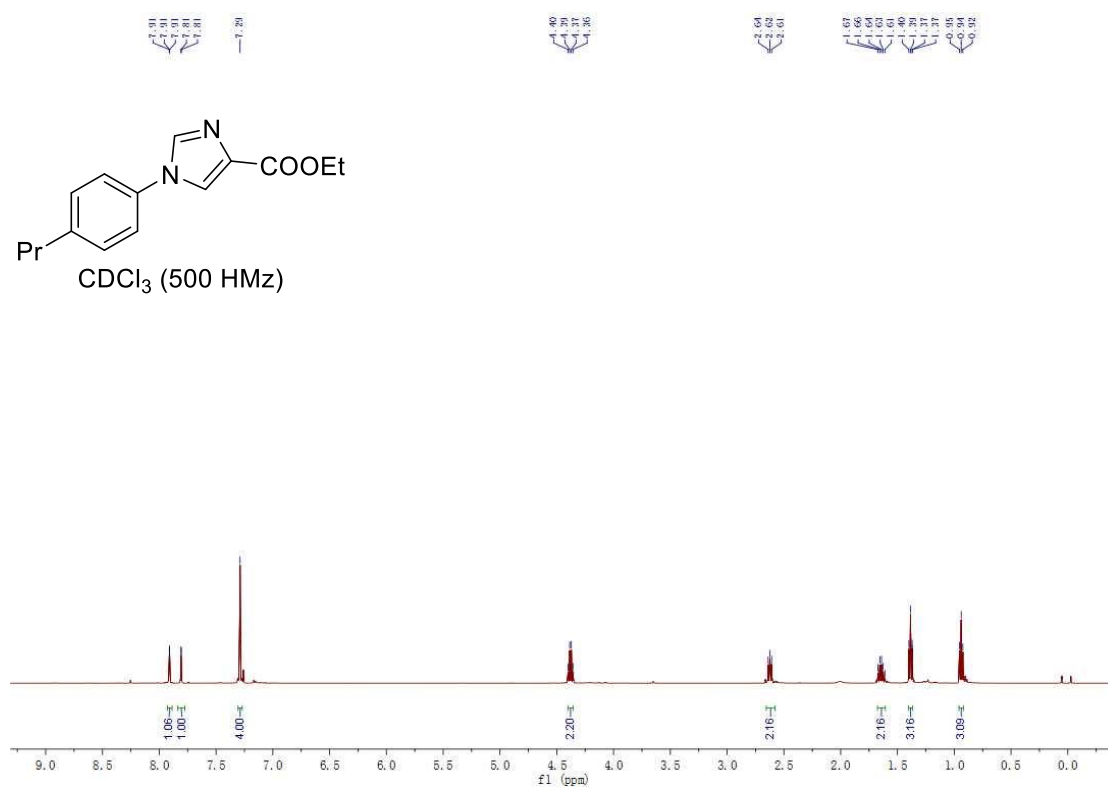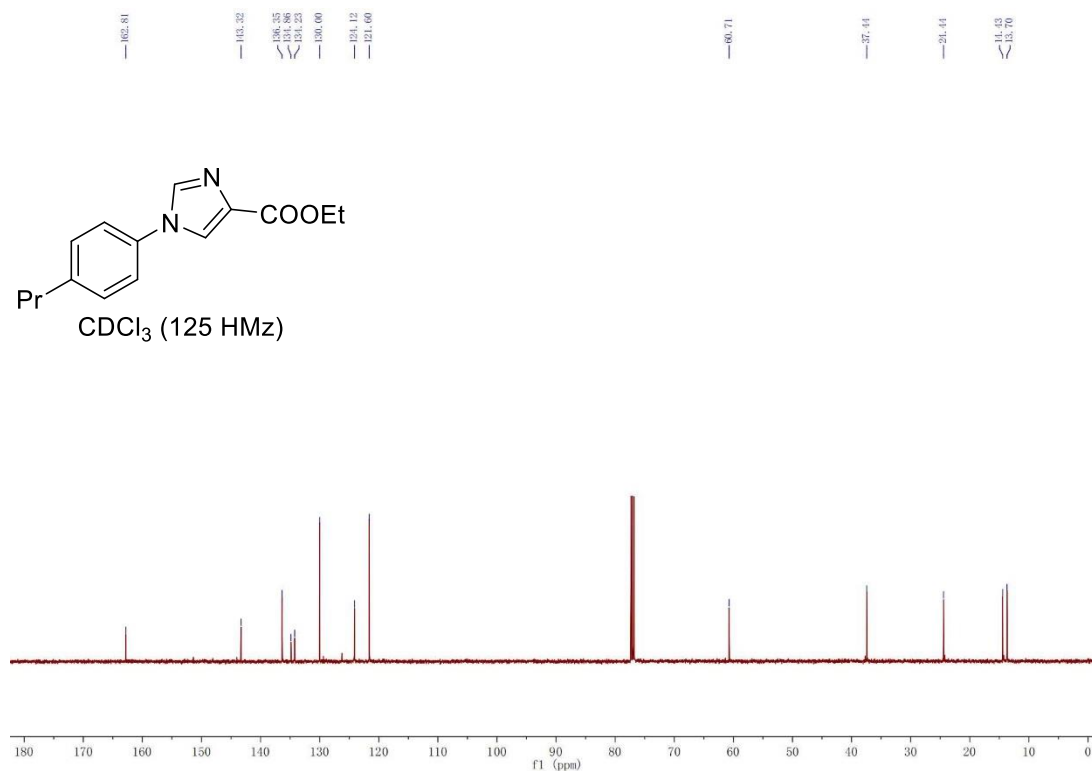

ethyl 1-(4-isopropylphenyl)-1*H*-imidazole-4-carboxylate (4g)

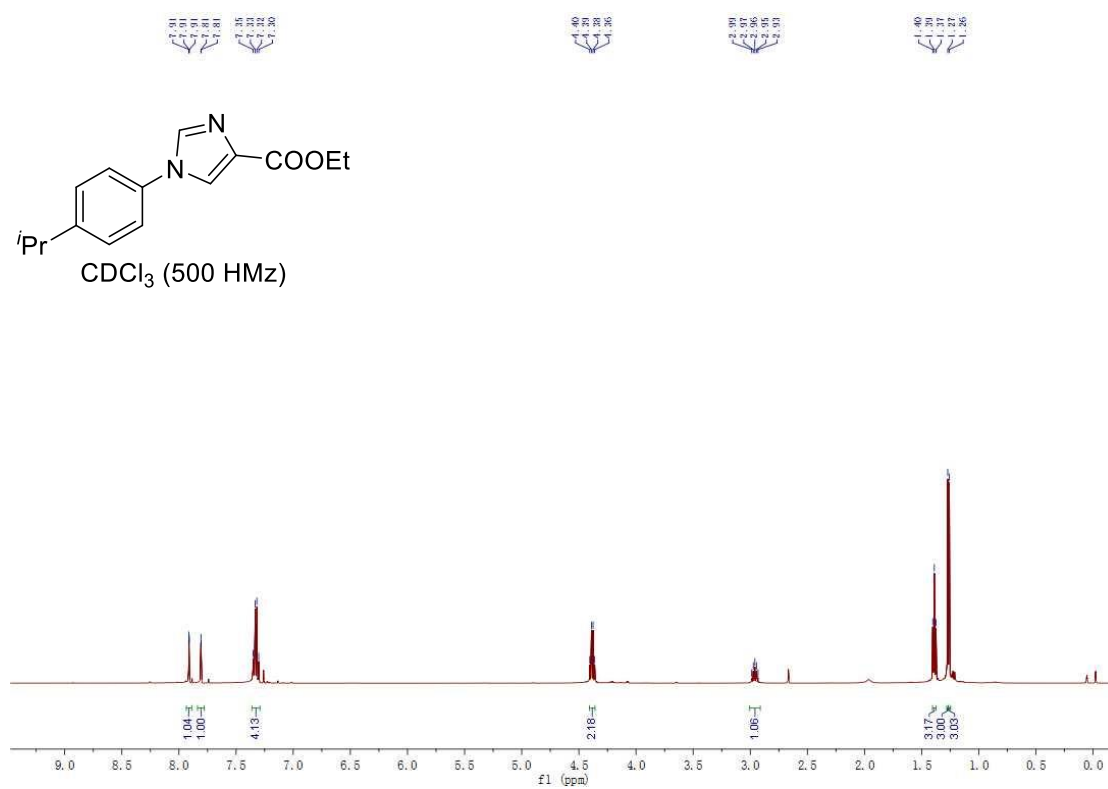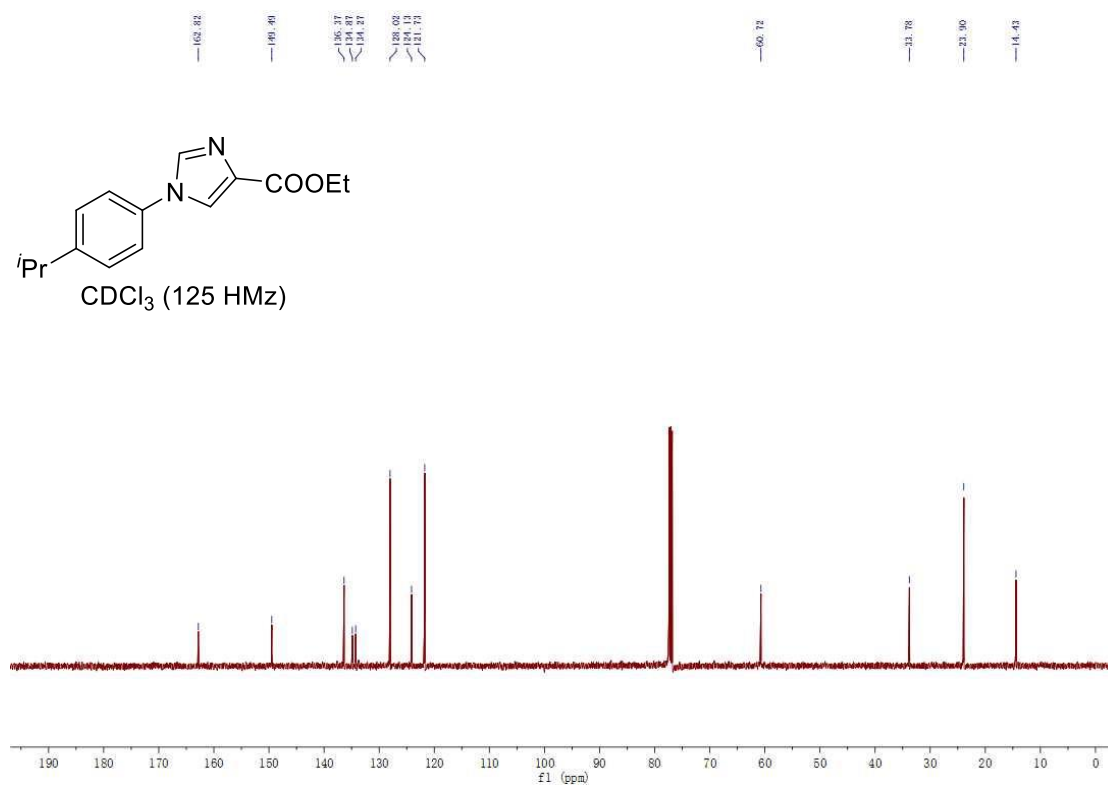

ethyl 1-(4-(*tert*-butyl)phenyl)-1*H*-imidazole-4-carboxylate (4h)

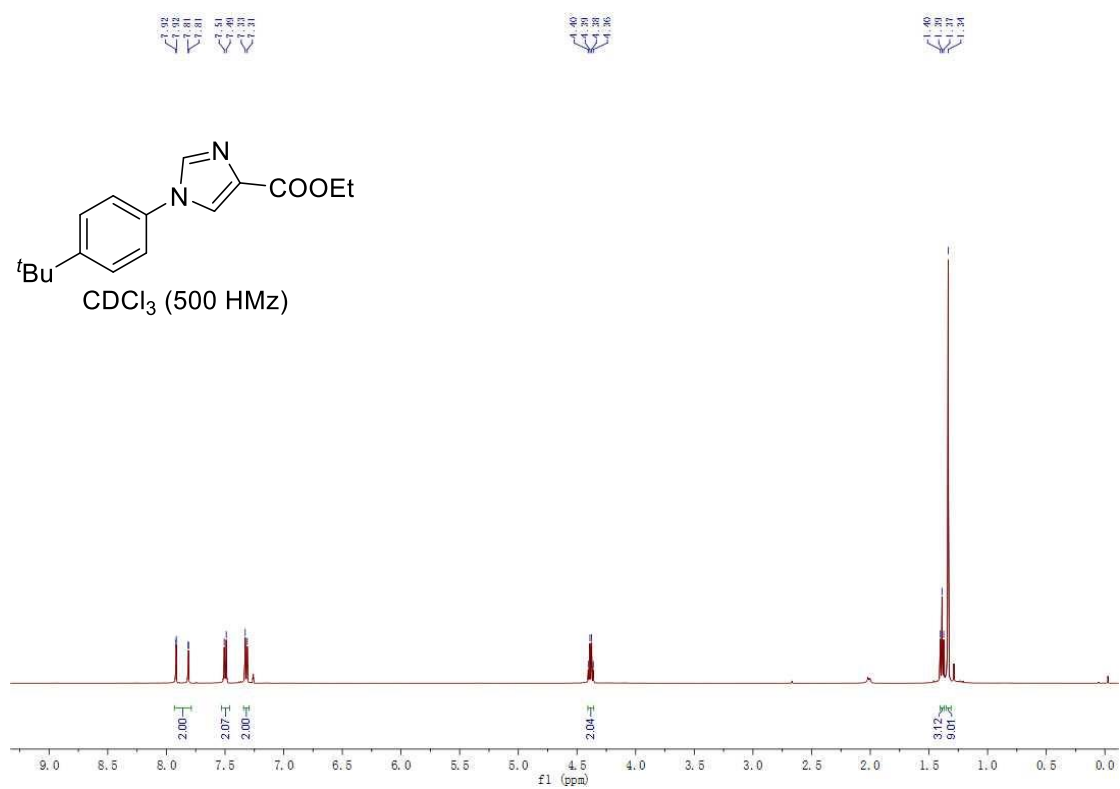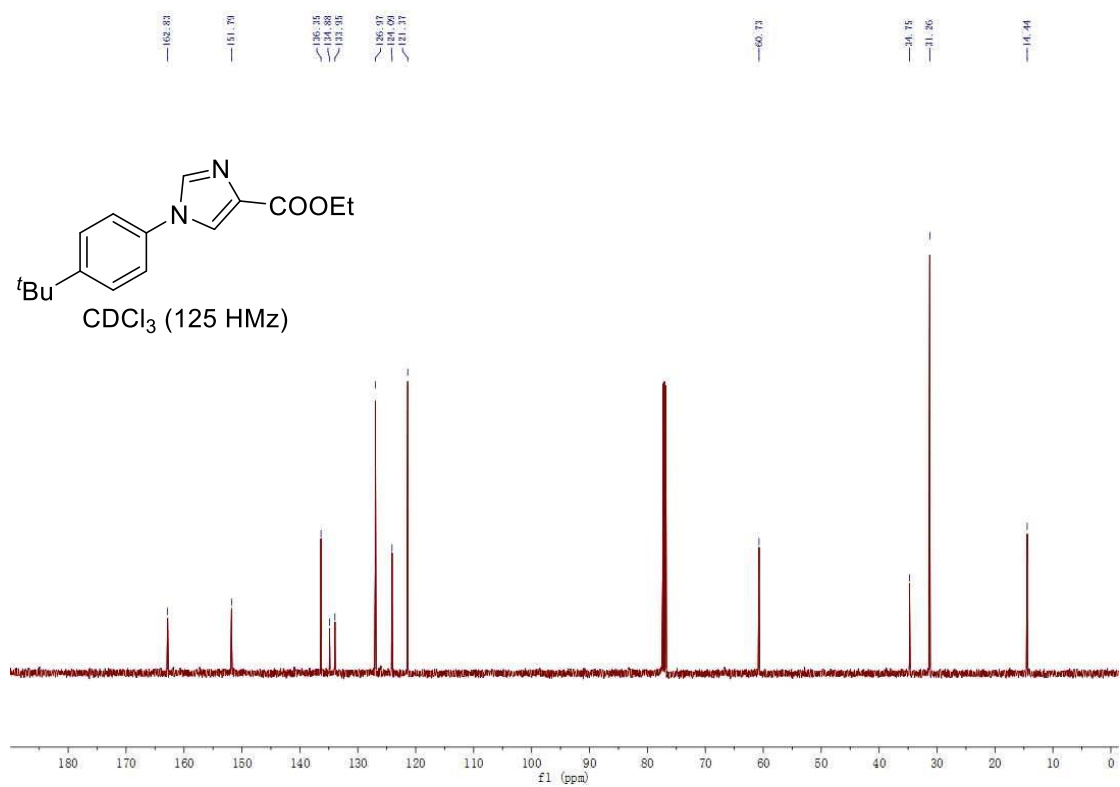

ethyl 1-([1,1'-biphenyl]-4-yl)-1*H*-imidazole-4-carboxylate (4i)

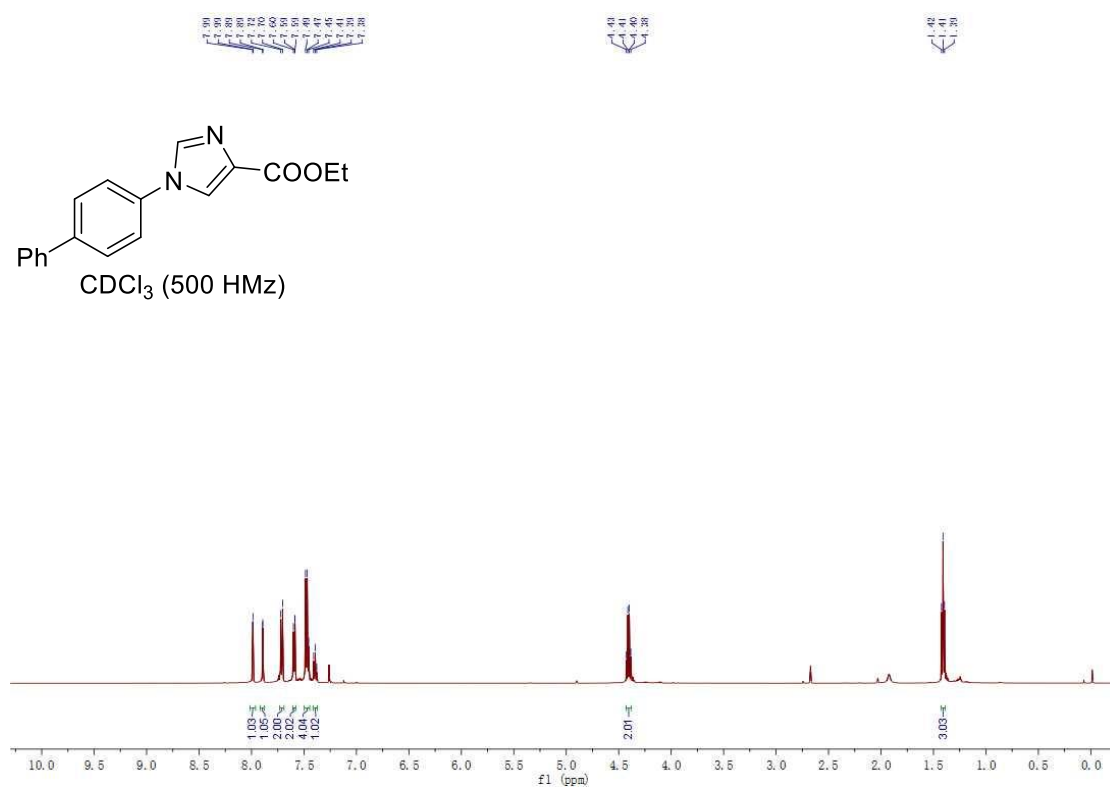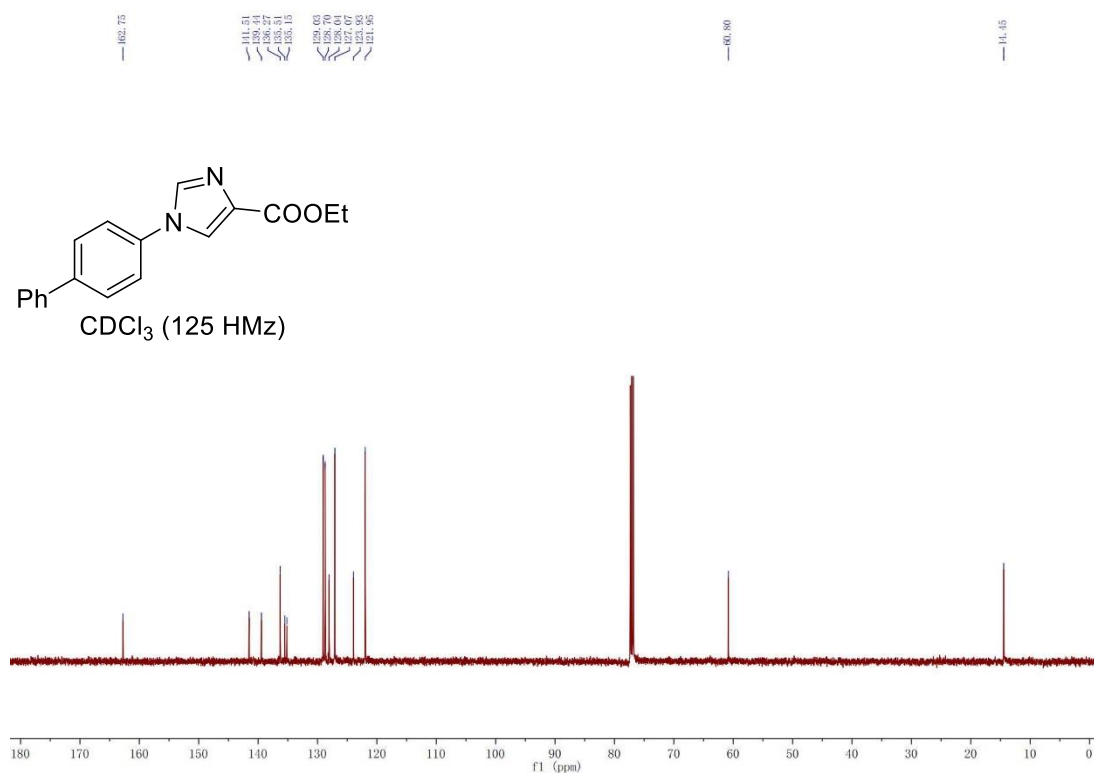

ethyl 1-(4-ethoxyphenyl)-1*H*-imidazole-4-carboxylate (4j)

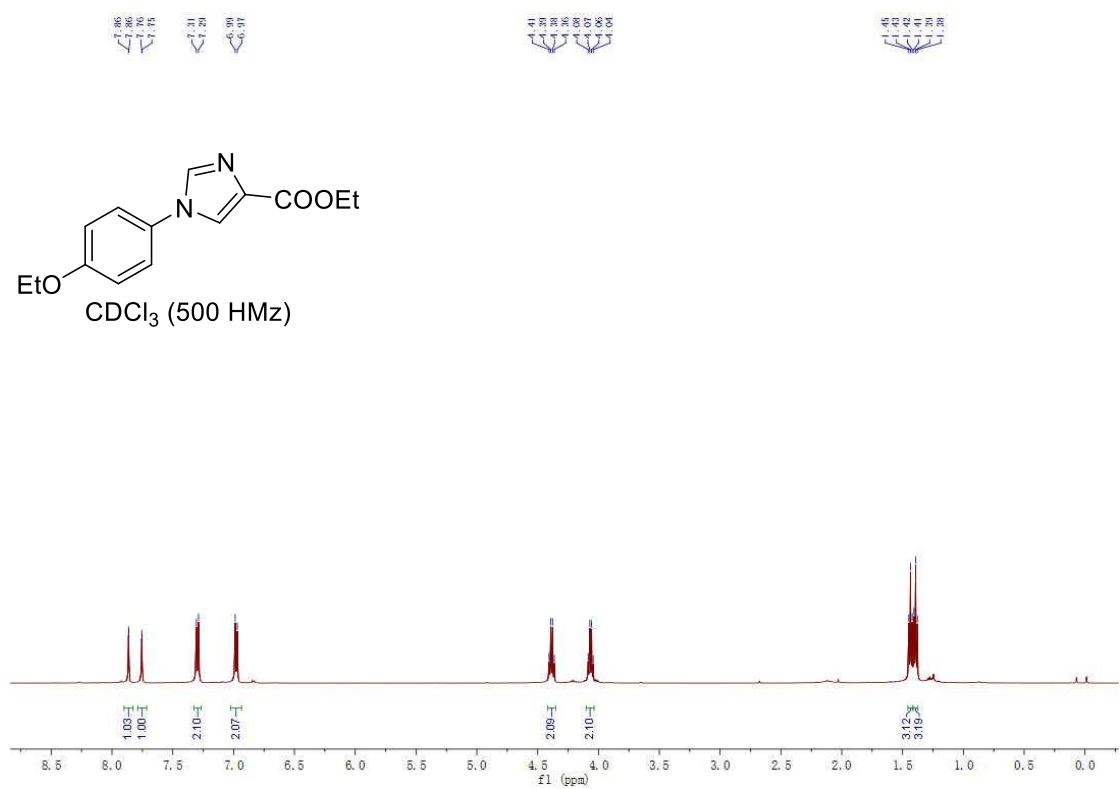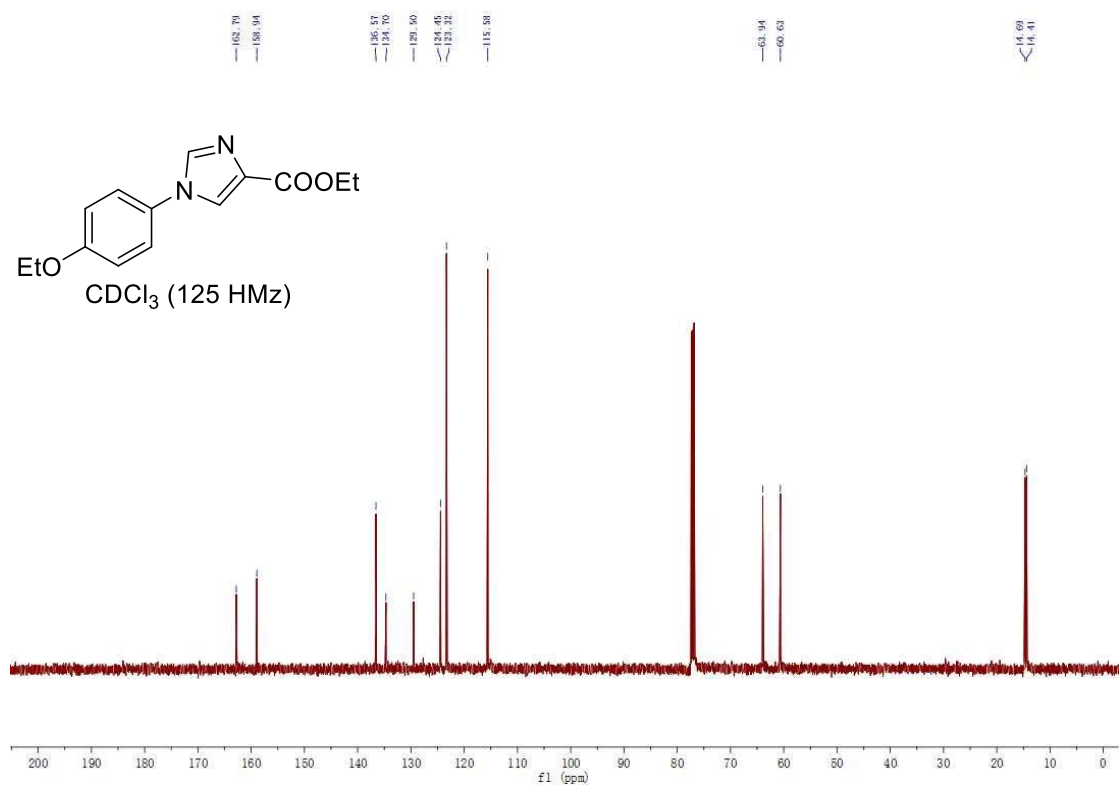

ethyl 1-(4-(methylthio)phenyl)-1*H*-imidazole-4-carboxylate (4k)

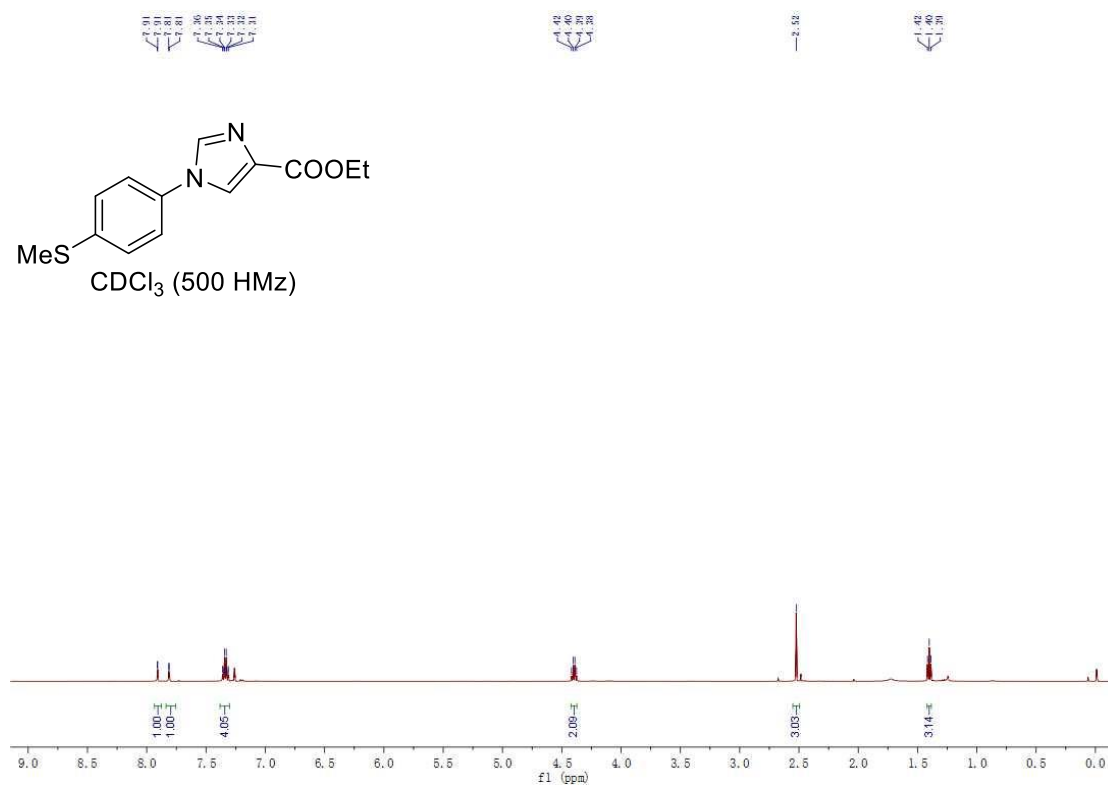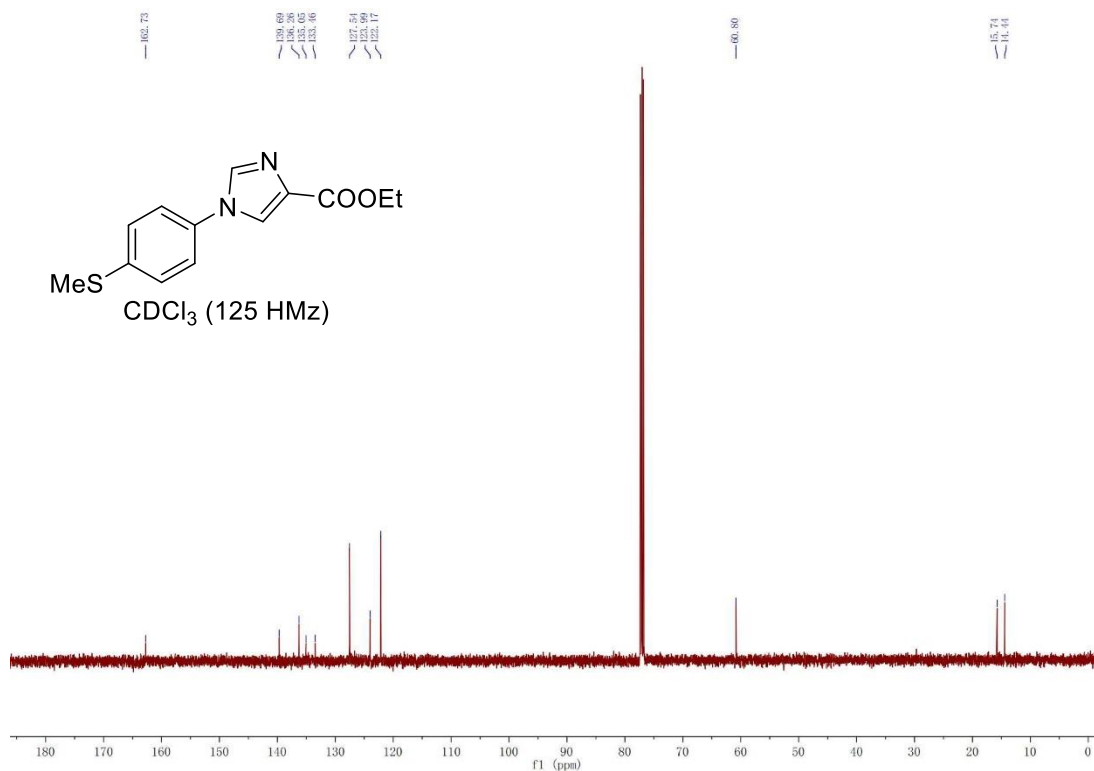



**ethyl 1-(4-phenoxyphenyl)-1*H*-imidazole-4-carboxylate (4l)**

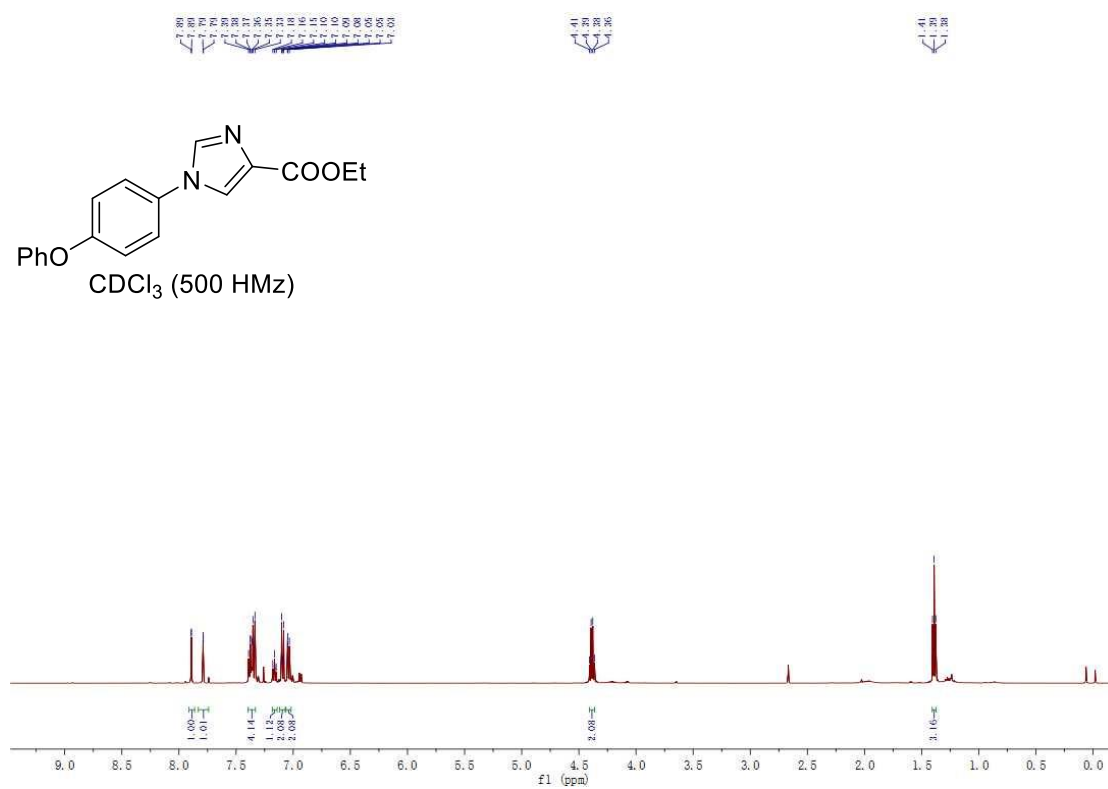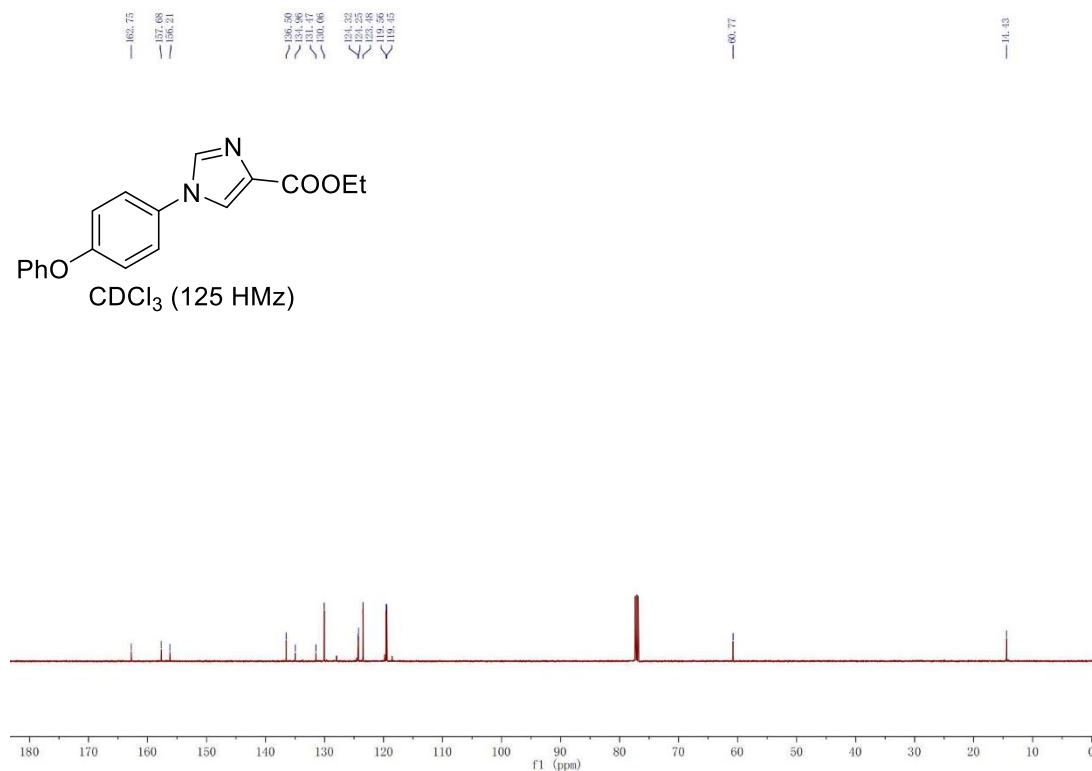

ethyl 1-(4-(piperidin-1-yl)phenyl)-1*H*-imidazole-4-carboxylate (4m)

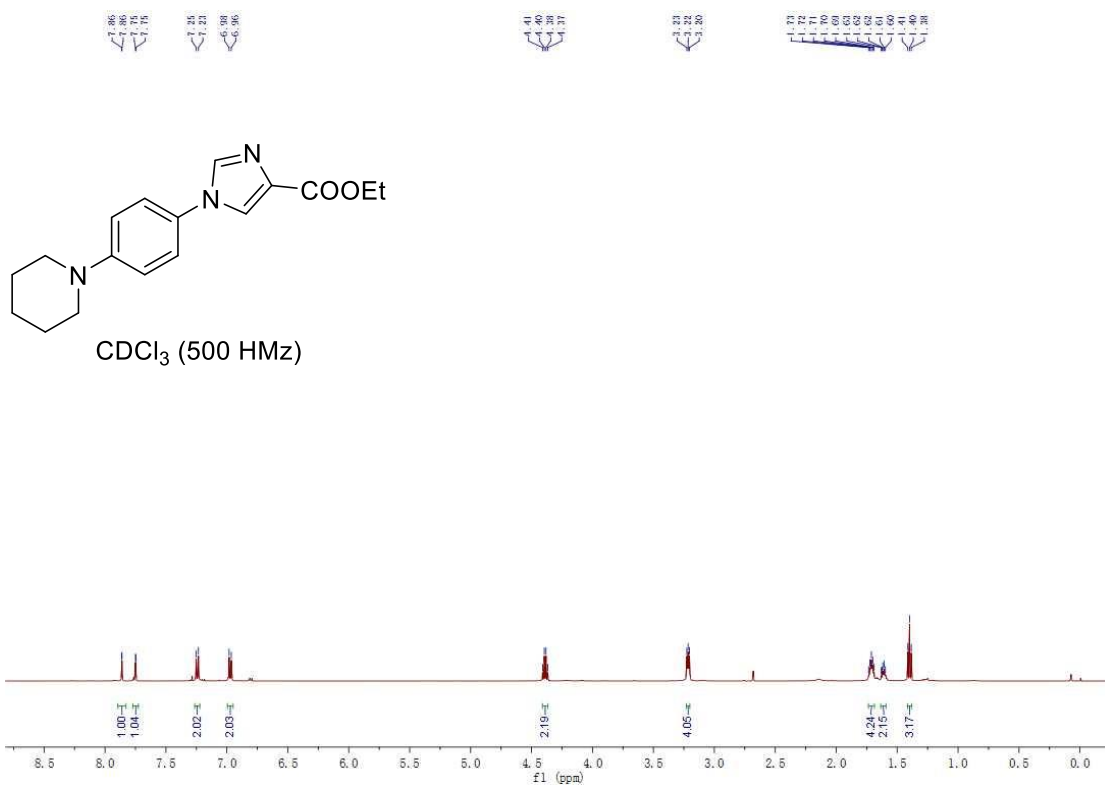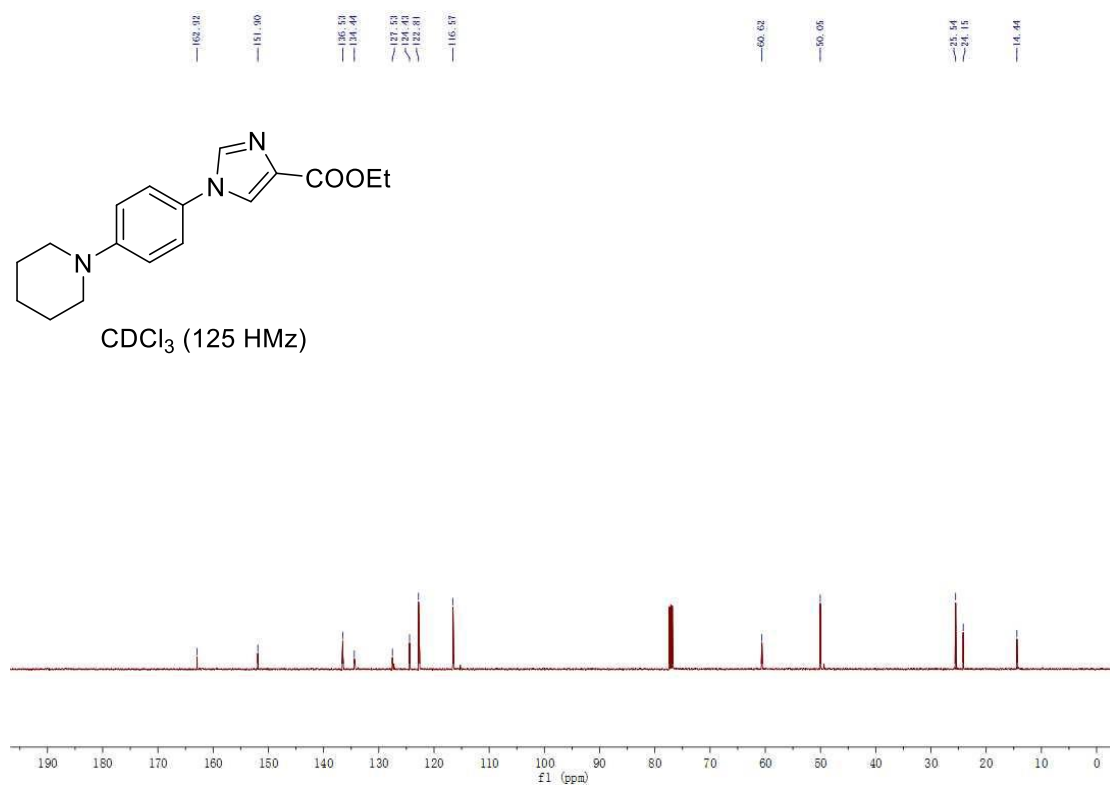

**ethyl 1-(4-cyanophenyl)-1H-imidazole-4-carboxylate (4n)**

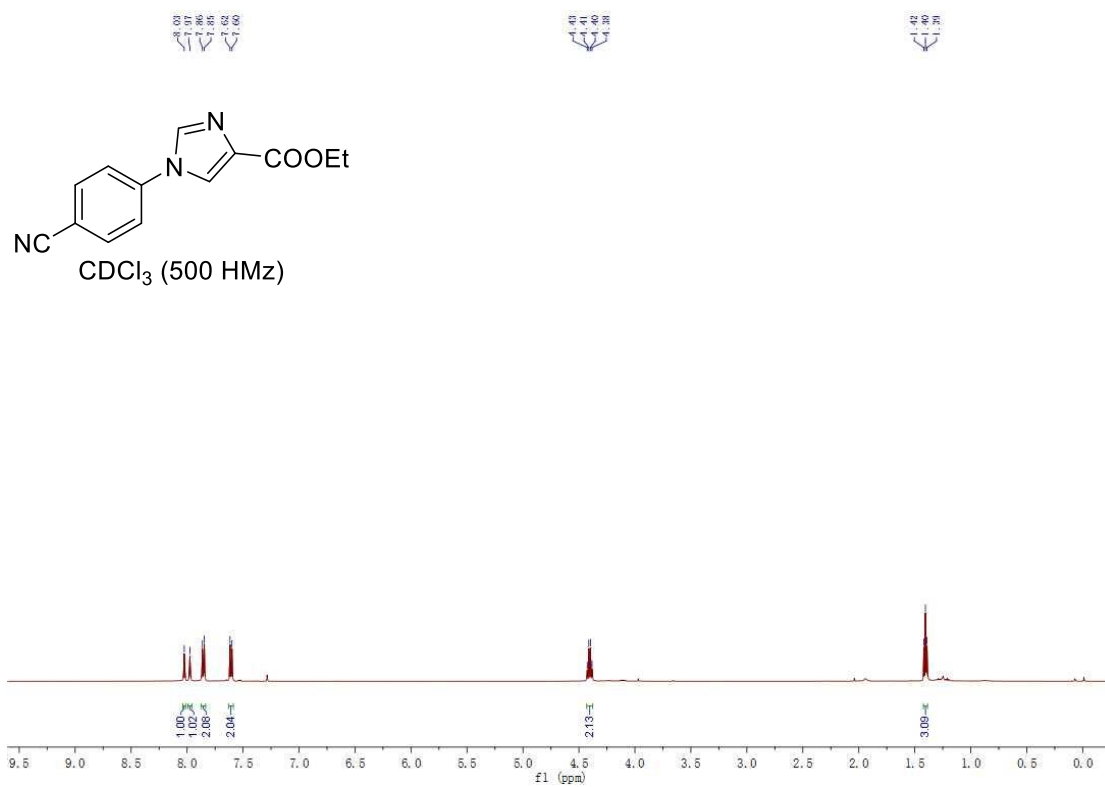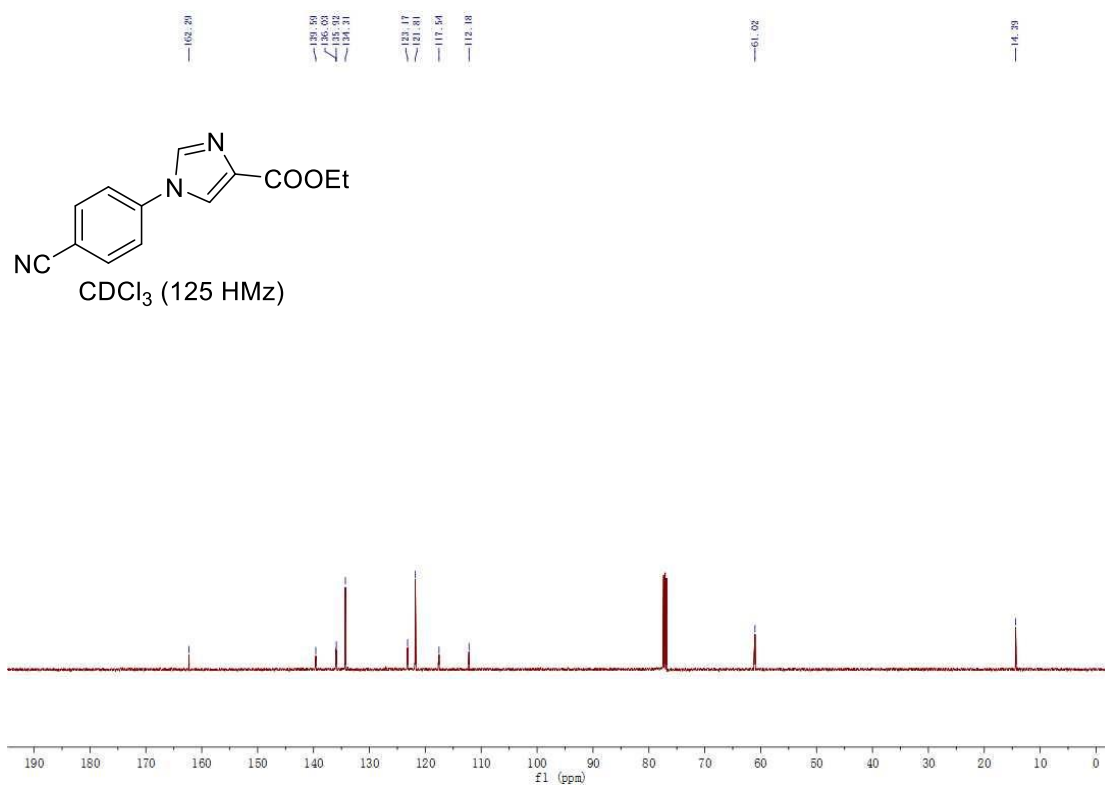

ethyl 1-(4-nitrophenyl)-1*H*-imidazole-4-carboxylate (4o)

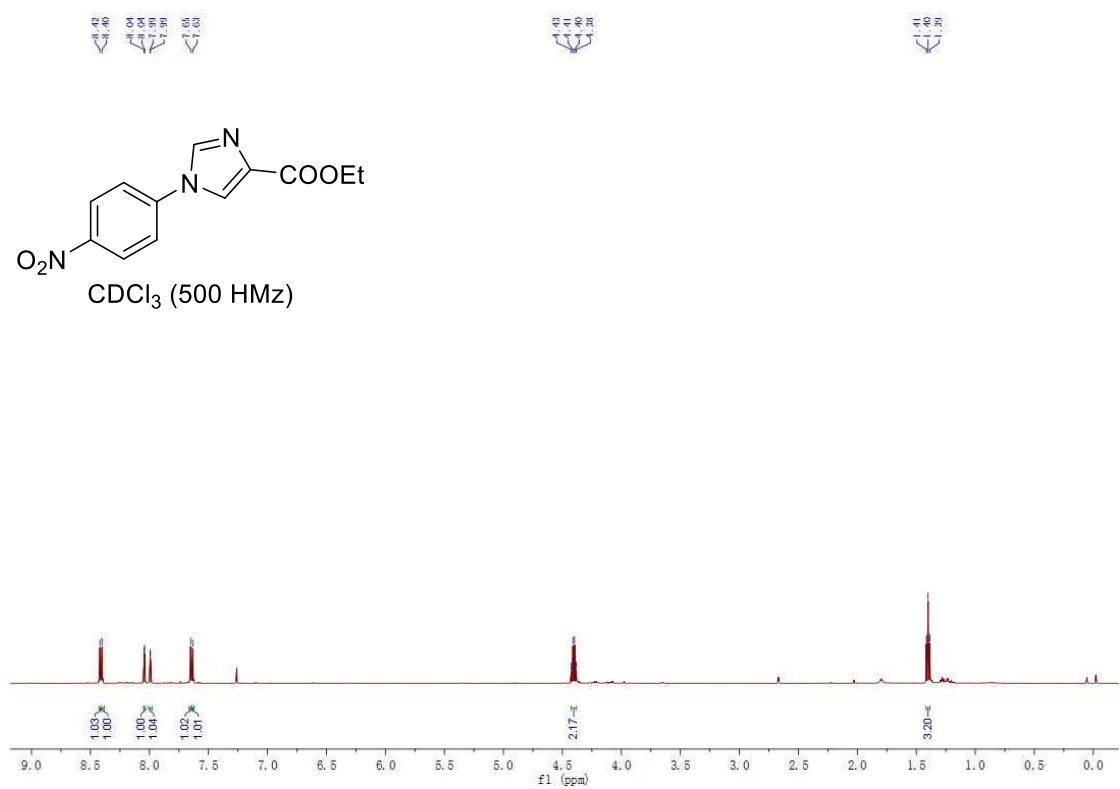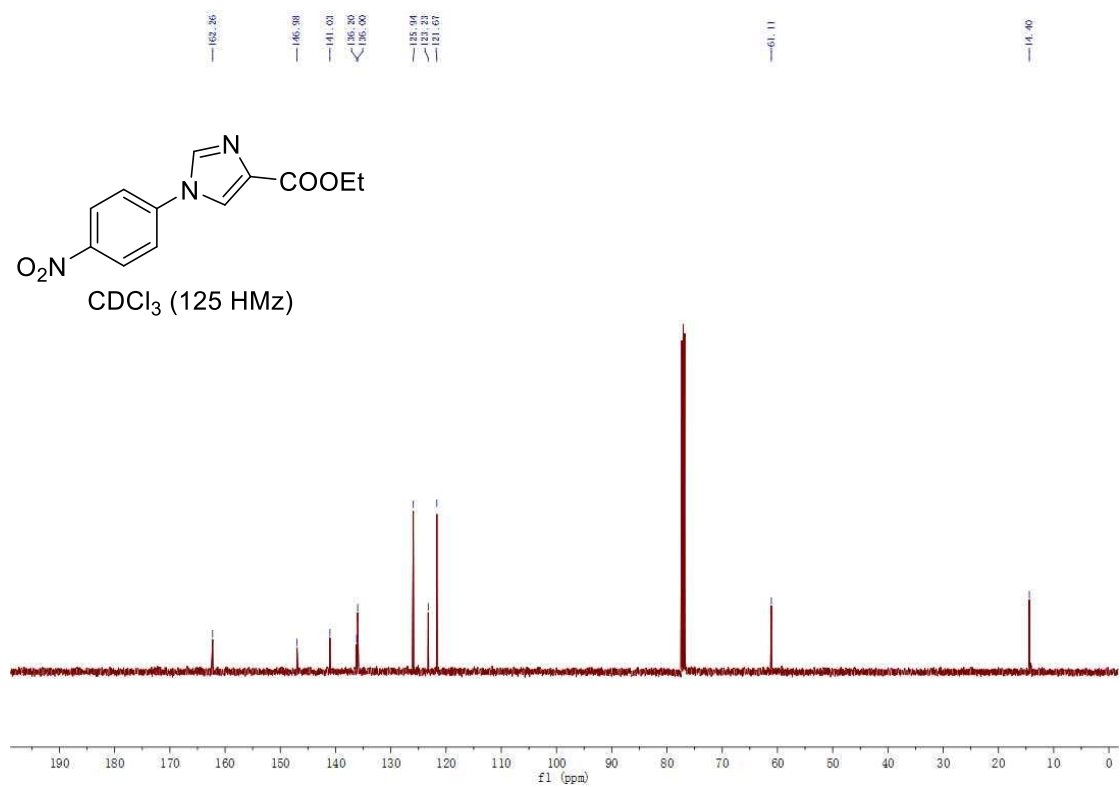

ethyl 1-(4-acetylphenyl)-1*H*-imidazole-4-carboxylate (4p)

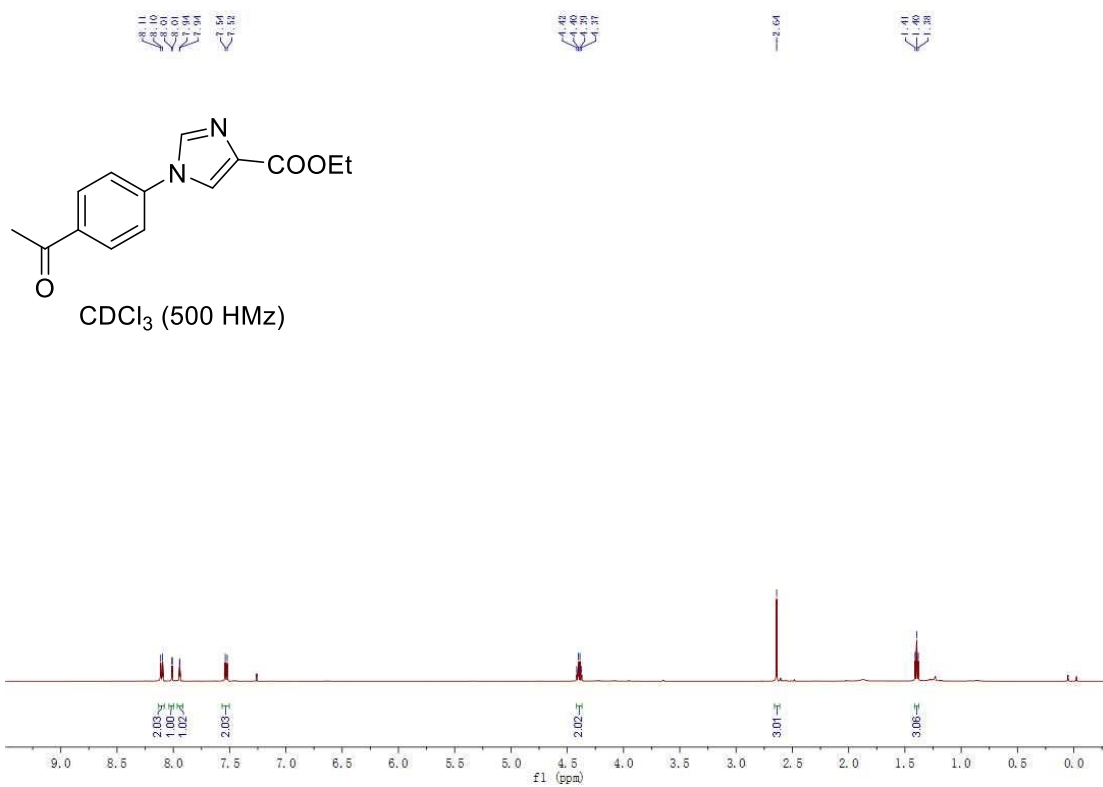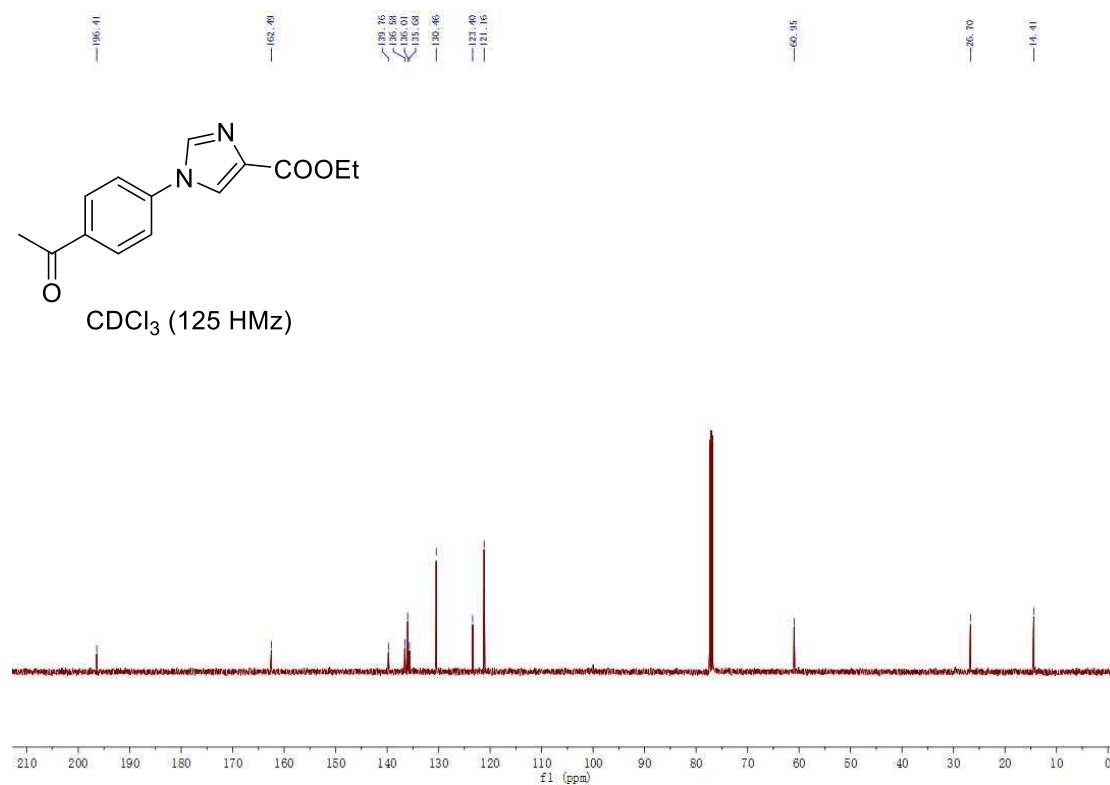

ethyl 1-(4-(cyanomethyl)phenyl)-1*H*-imidazole-4-carboxylate (4q)

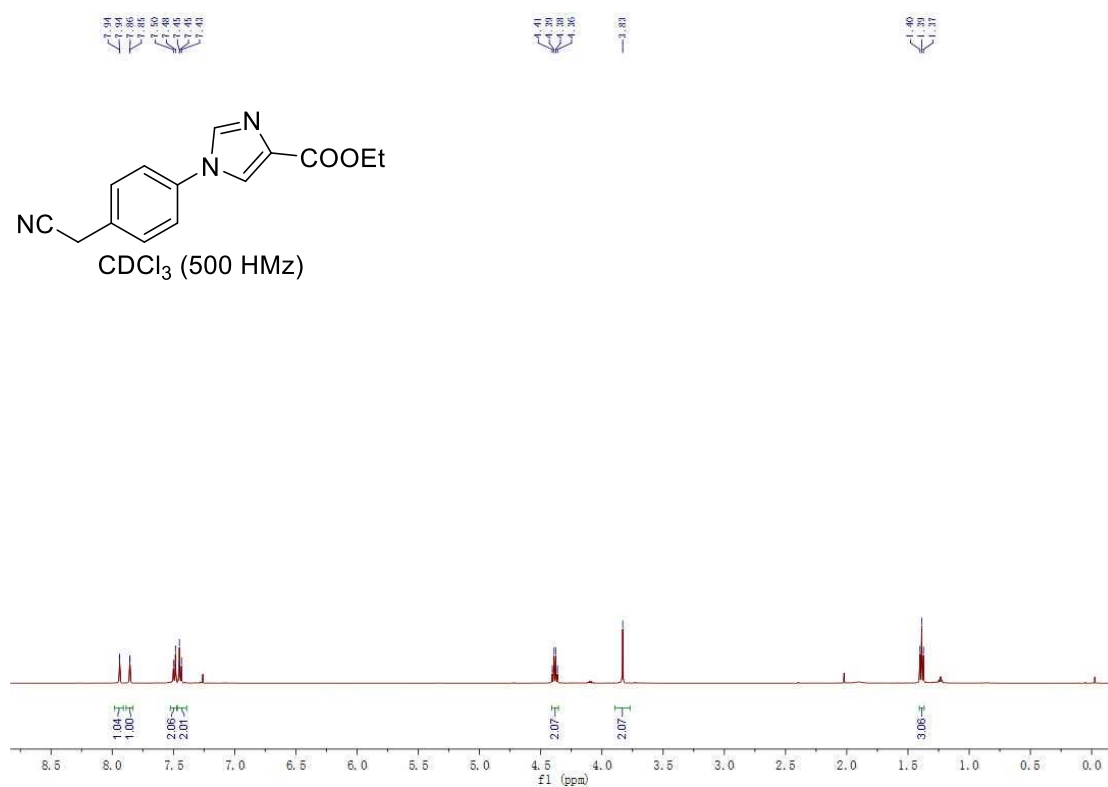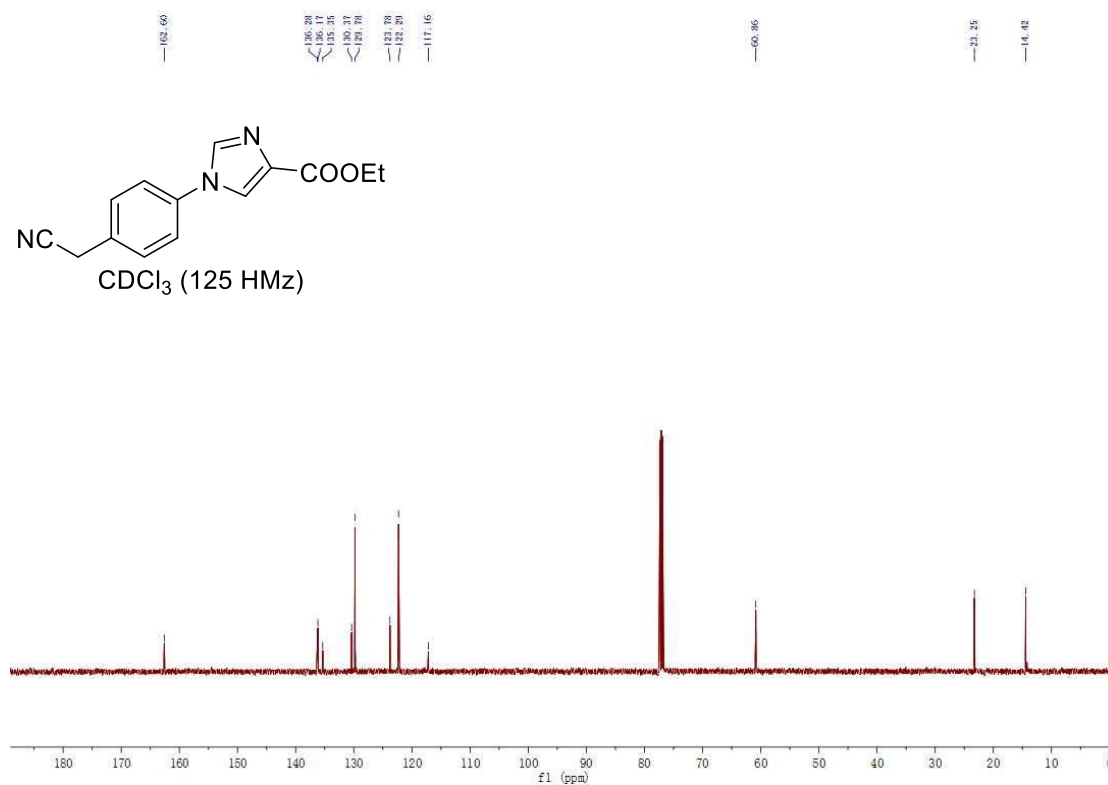

ethyl 1-(4-(ethoxycarbonyl)phenyl)-1H-imidazole-4-carboxylate (4r)

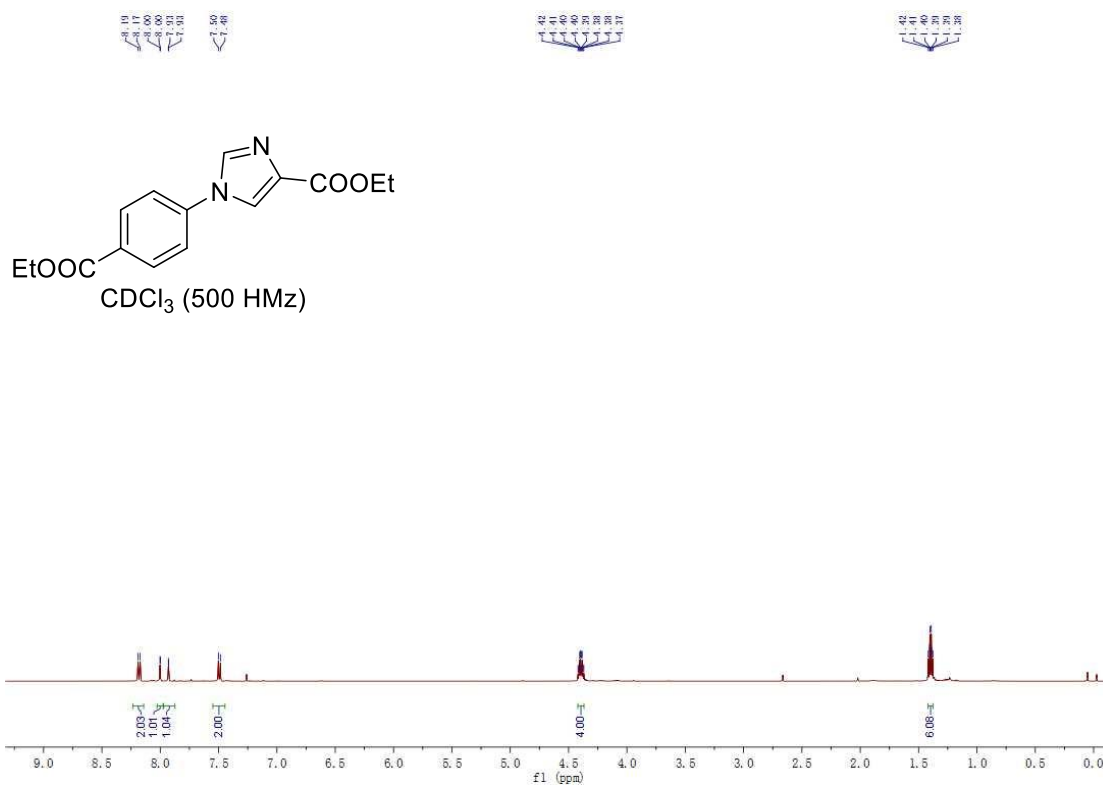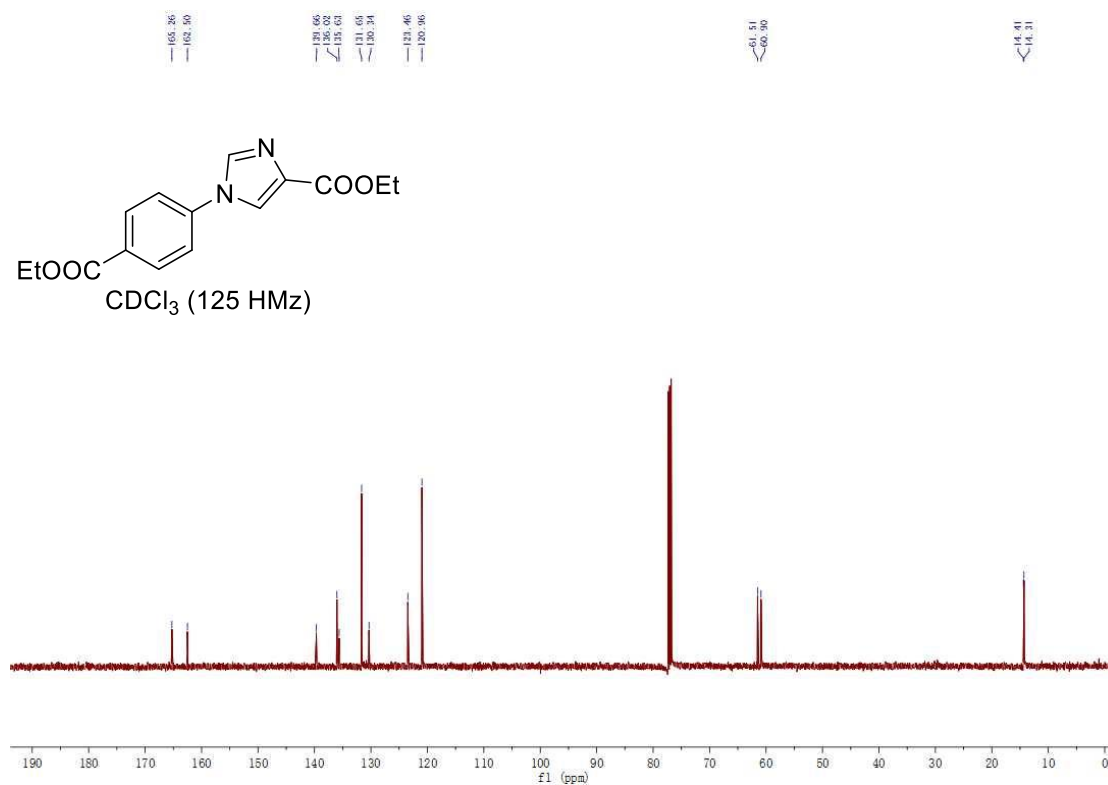

**ethyl 1-(3-fluorophenyl)-1*H*-imidazole-4-carboxylate (4s)**

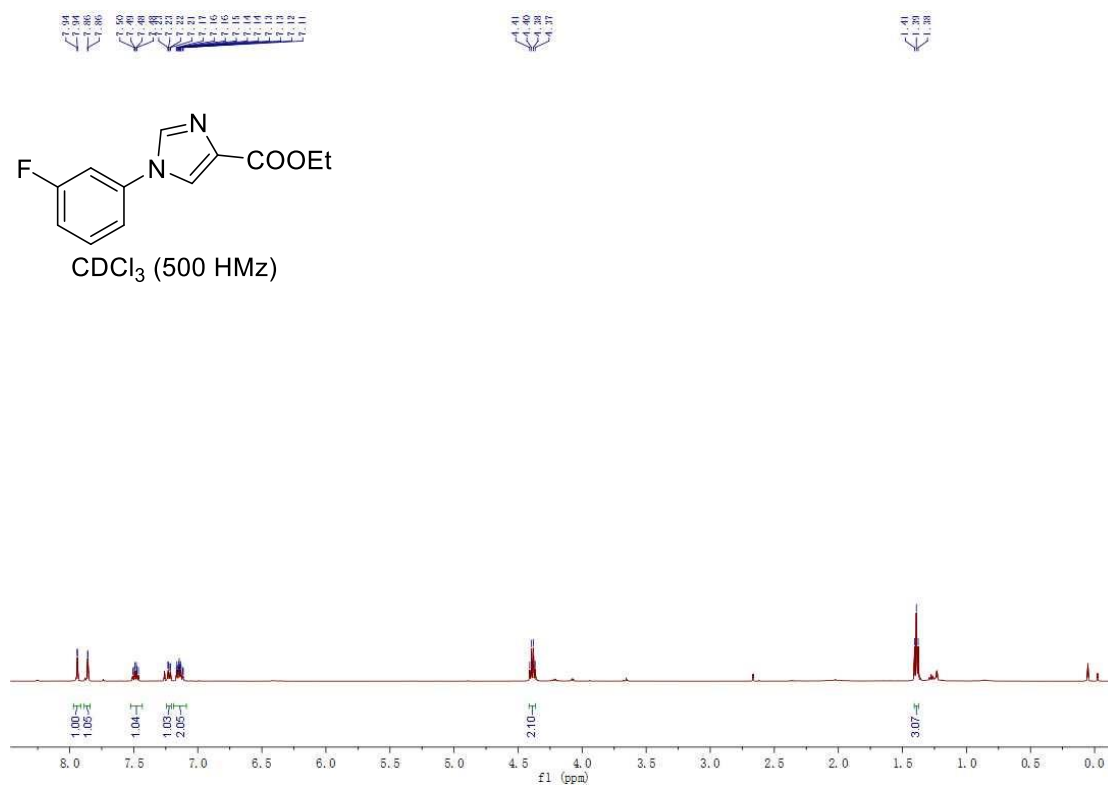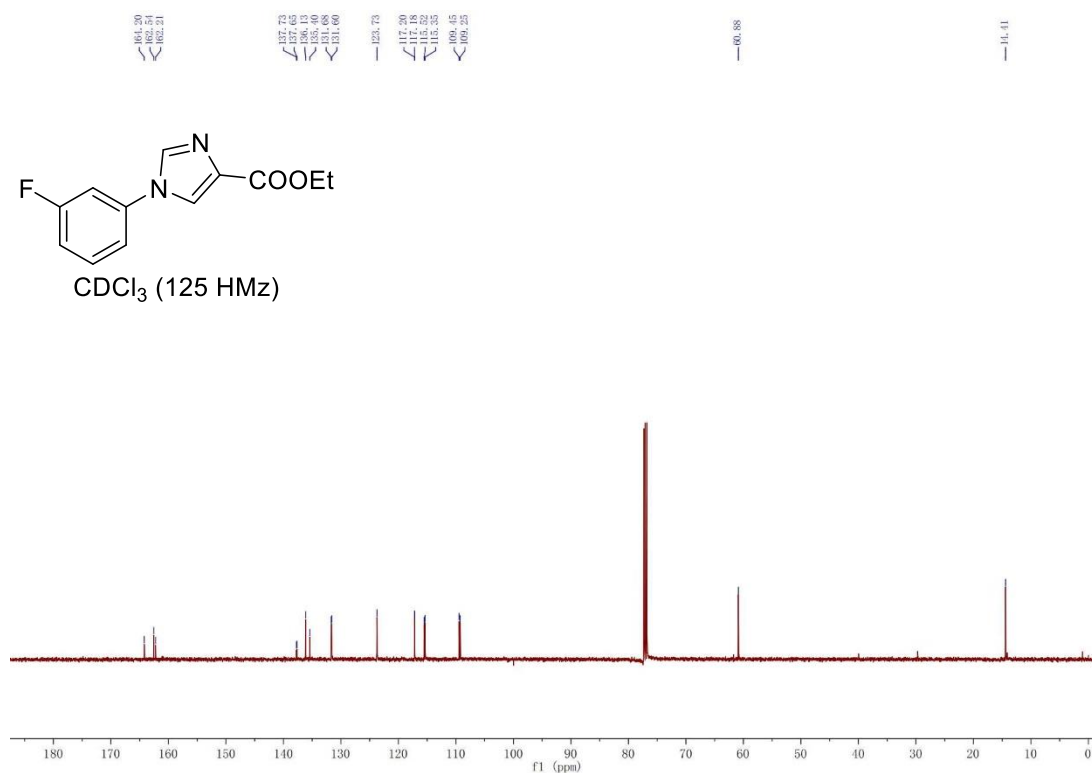



ethyl 1-(2-(trifluoromethyl)phenyl)-1H-imidazole-4-carboxylate (4t)

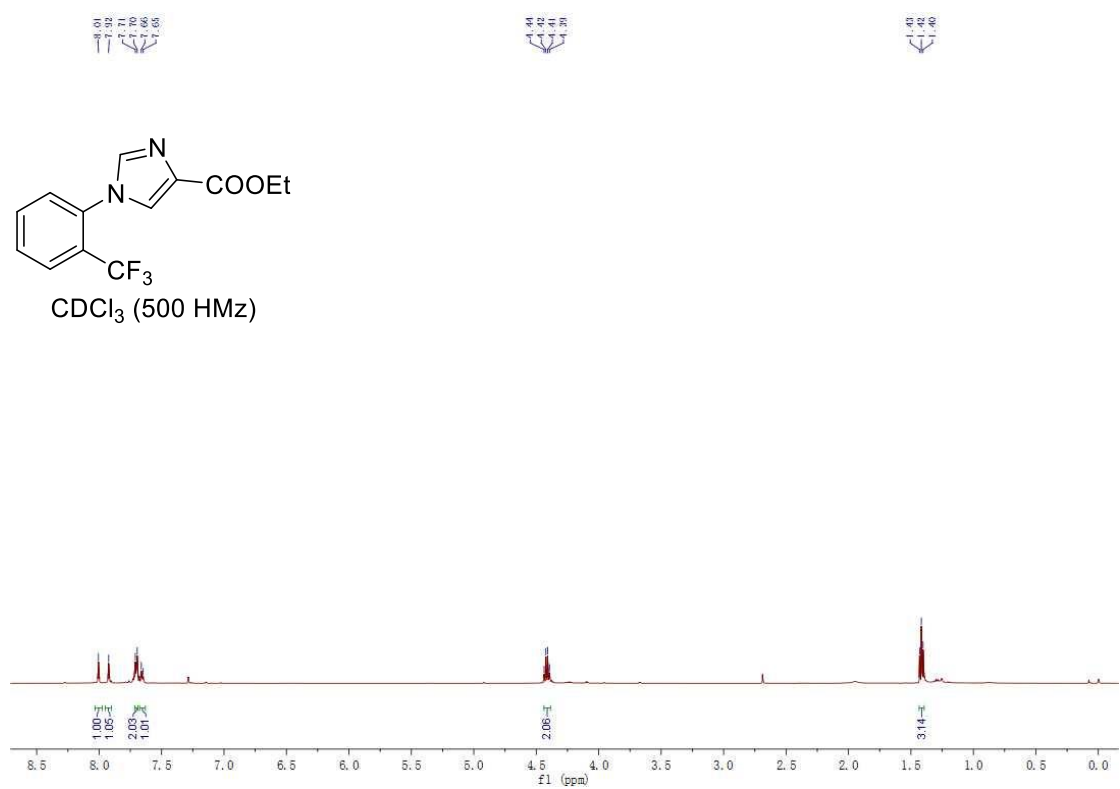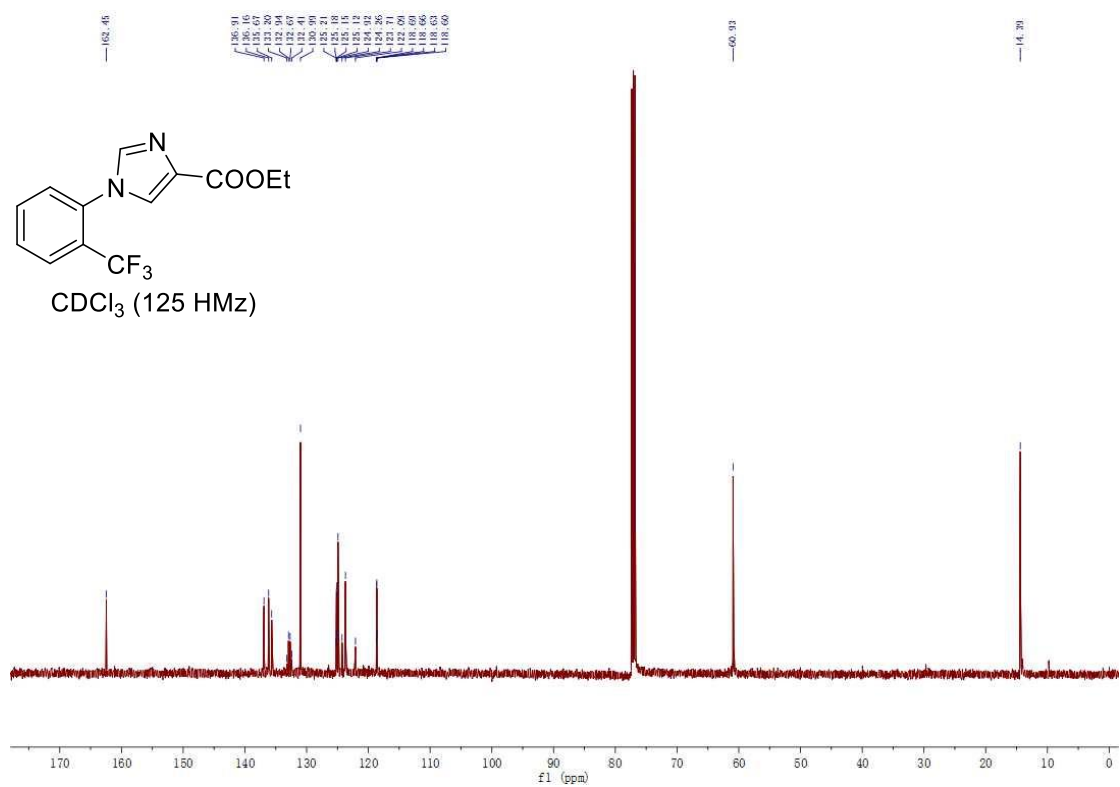

ethyl 1-(3,4-dimethylphenyl)-1*H*-imidazole-4-carboxylate (4u)

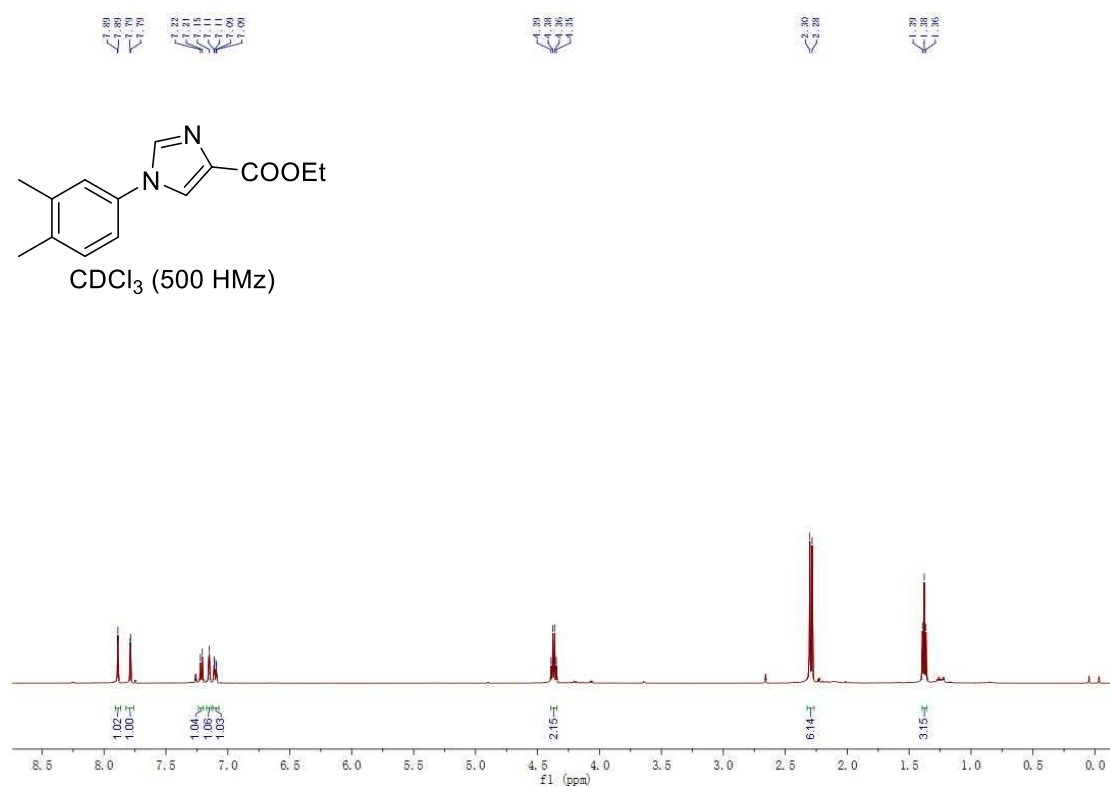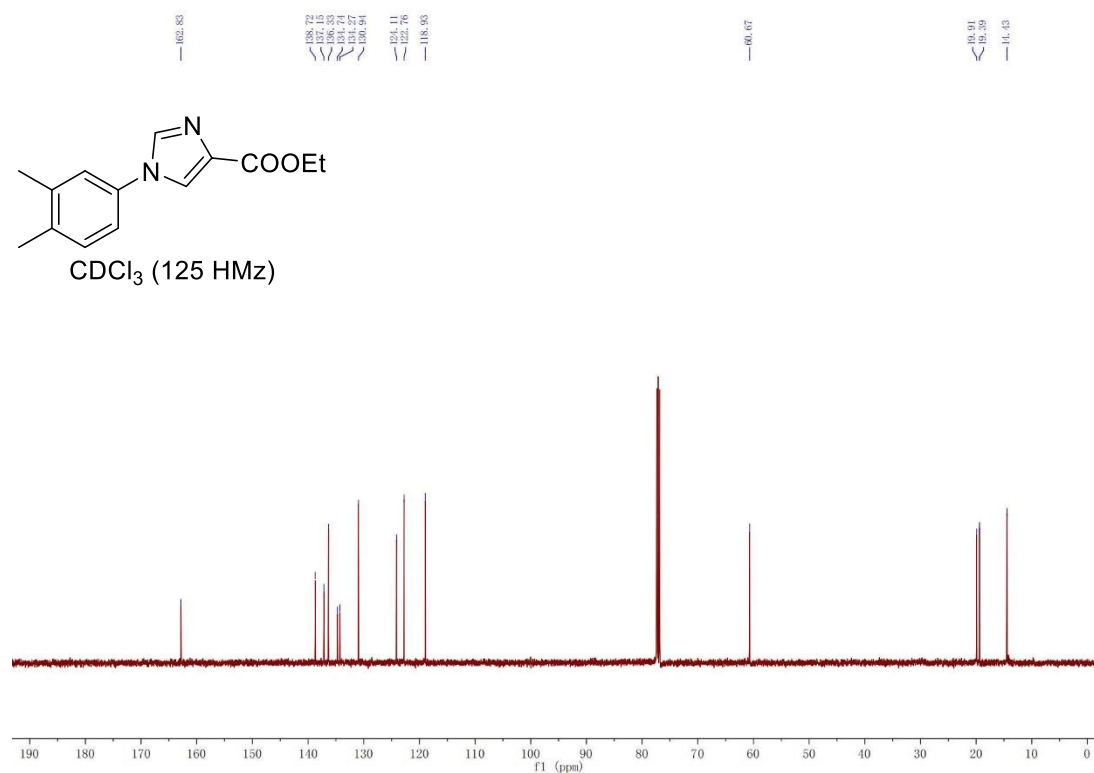

ethyl 1-benzyl-1H-imidazole-4-carboxylate (4v)

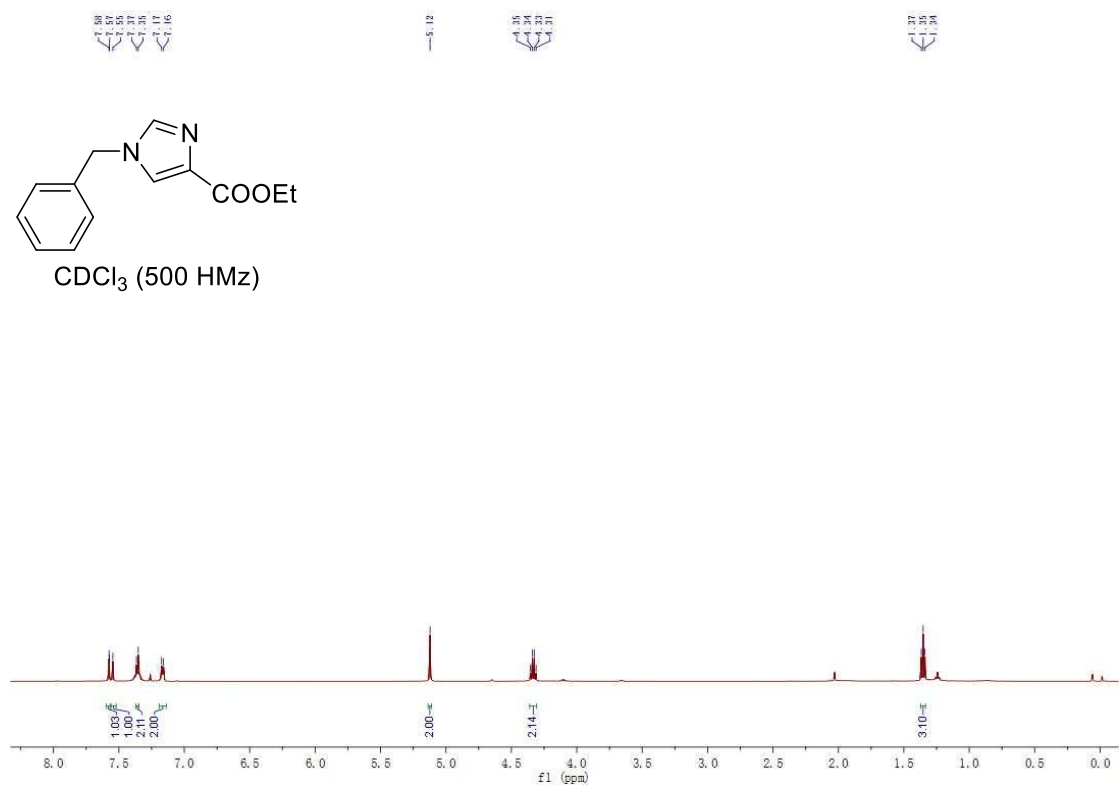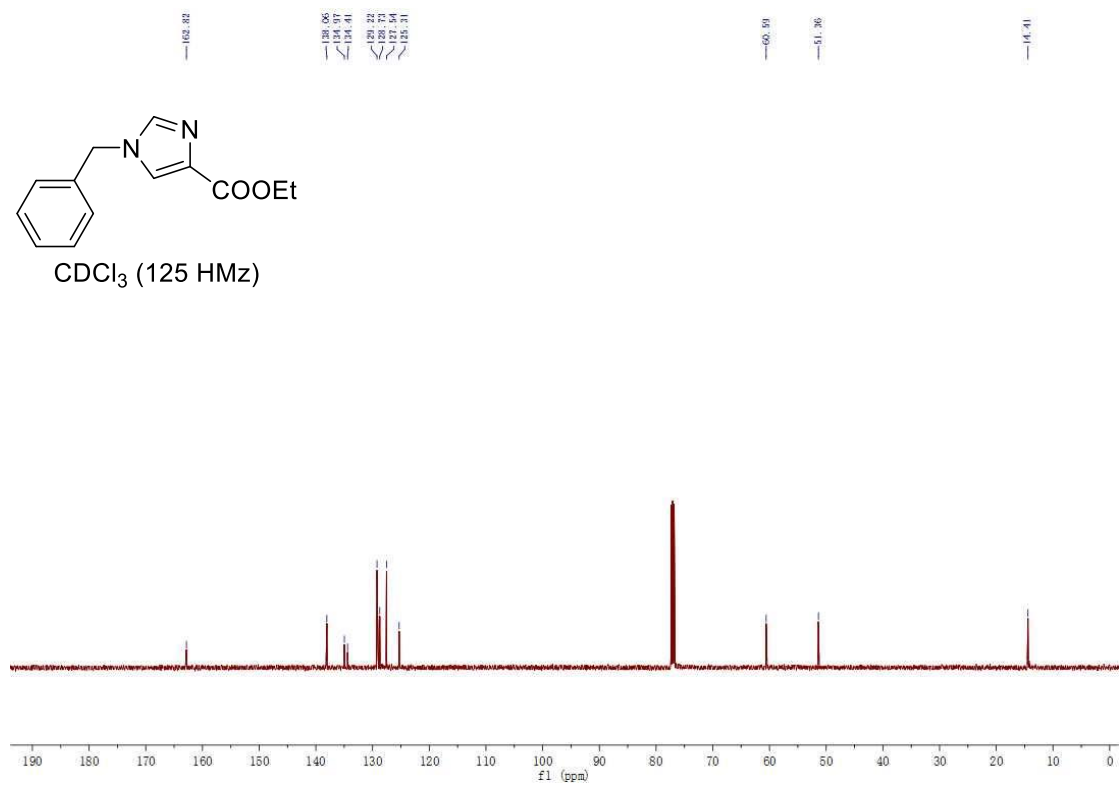

ethyl 1-(naphthalen-2-yl)-1*H*-imidazole-4-carboxylate (4w)

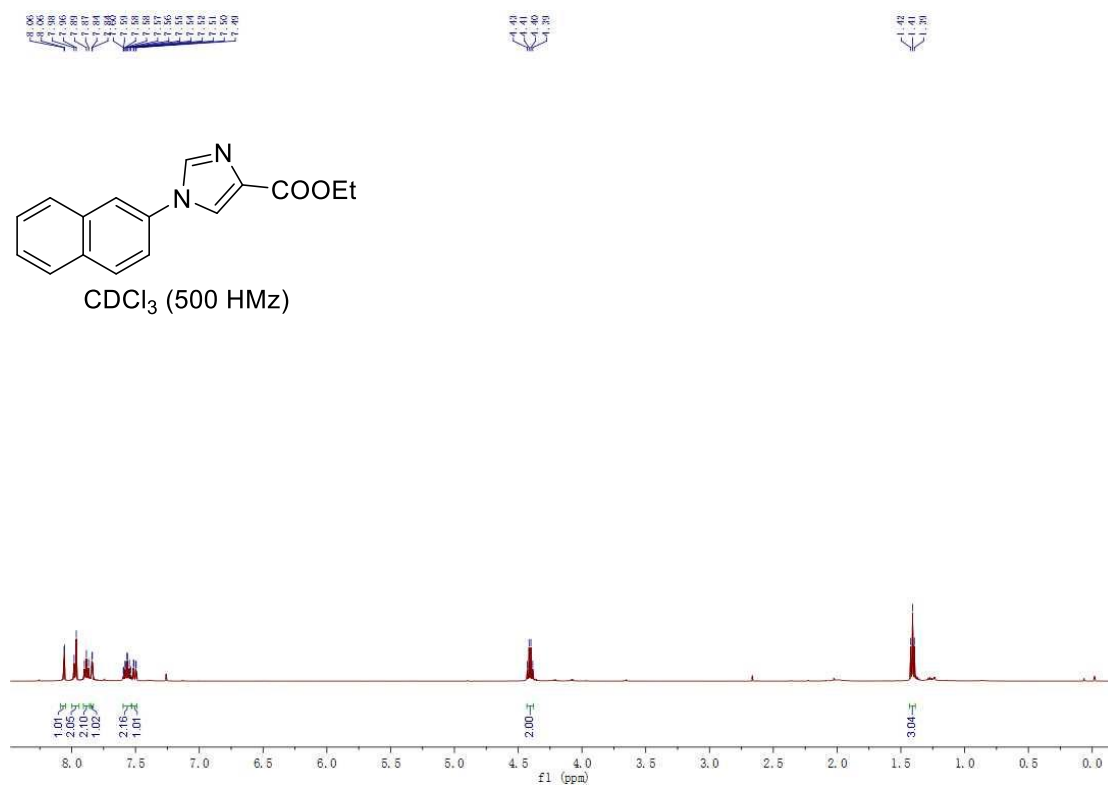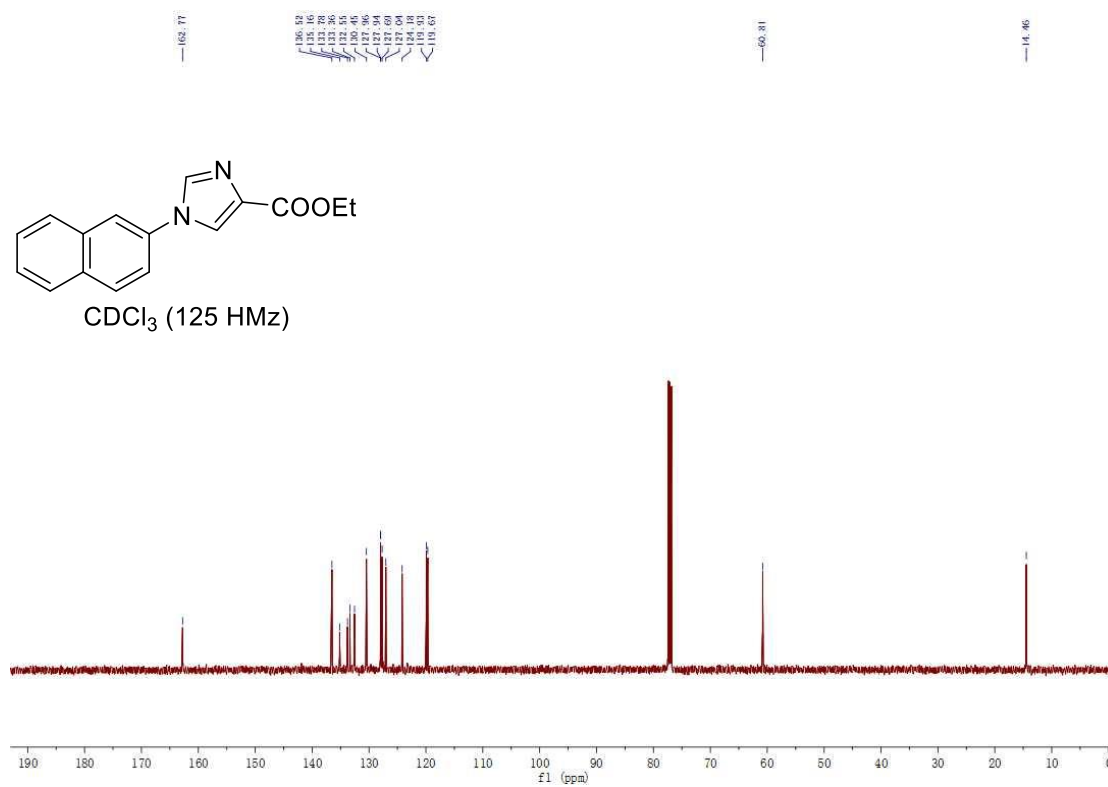

ethyl 1-(pyren-4-yl)-1*H*-imidazole-4-carboxylate (4x)

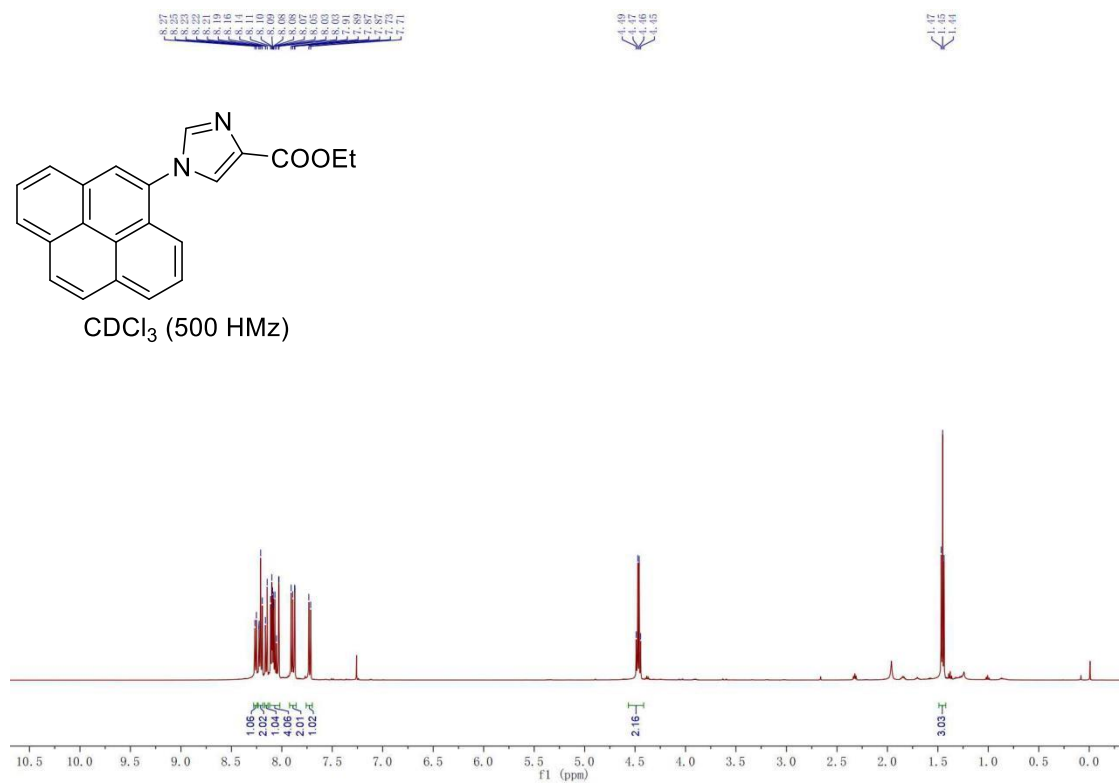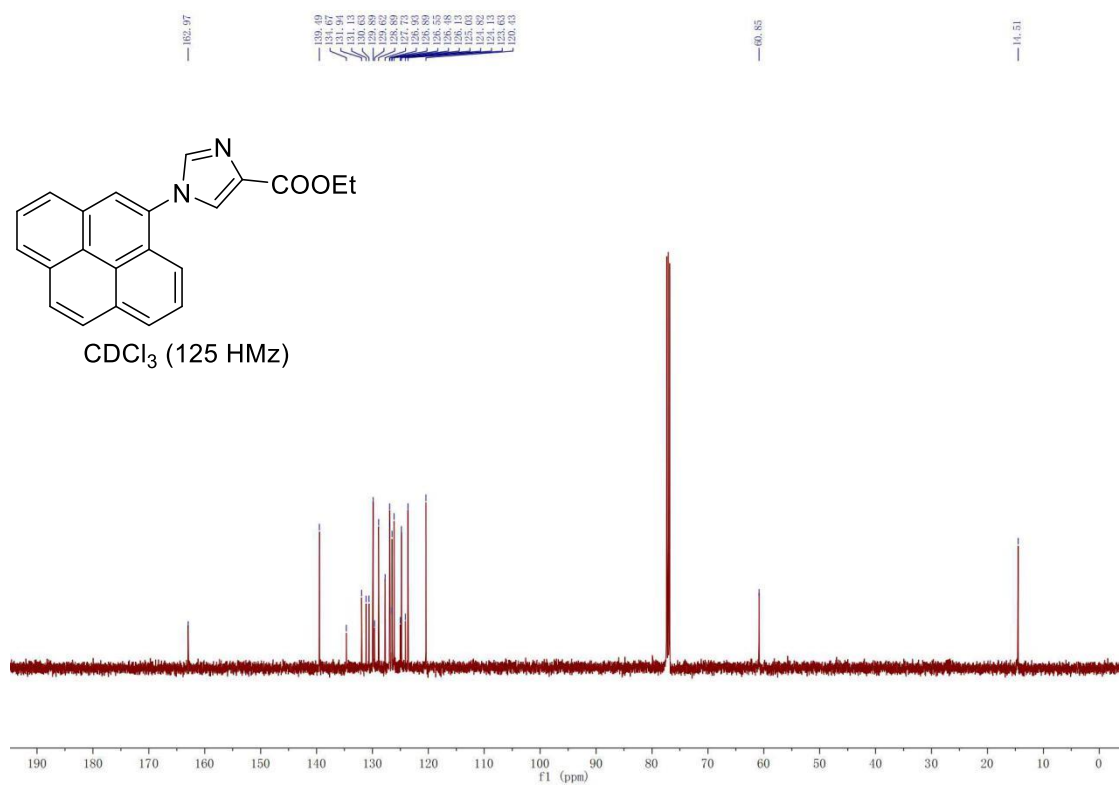

ethyl 1-(2-methyl-1*H*-indol-5-yl)-1*H*-imidazole-4-carboxylate (4y)

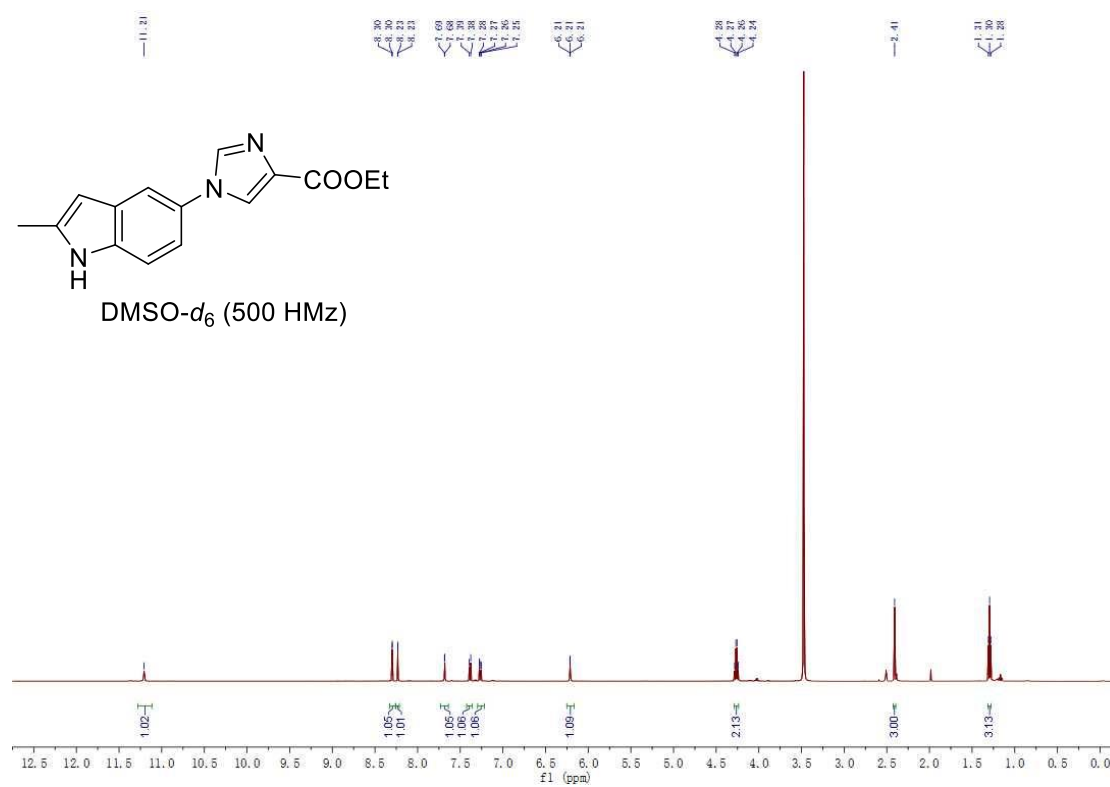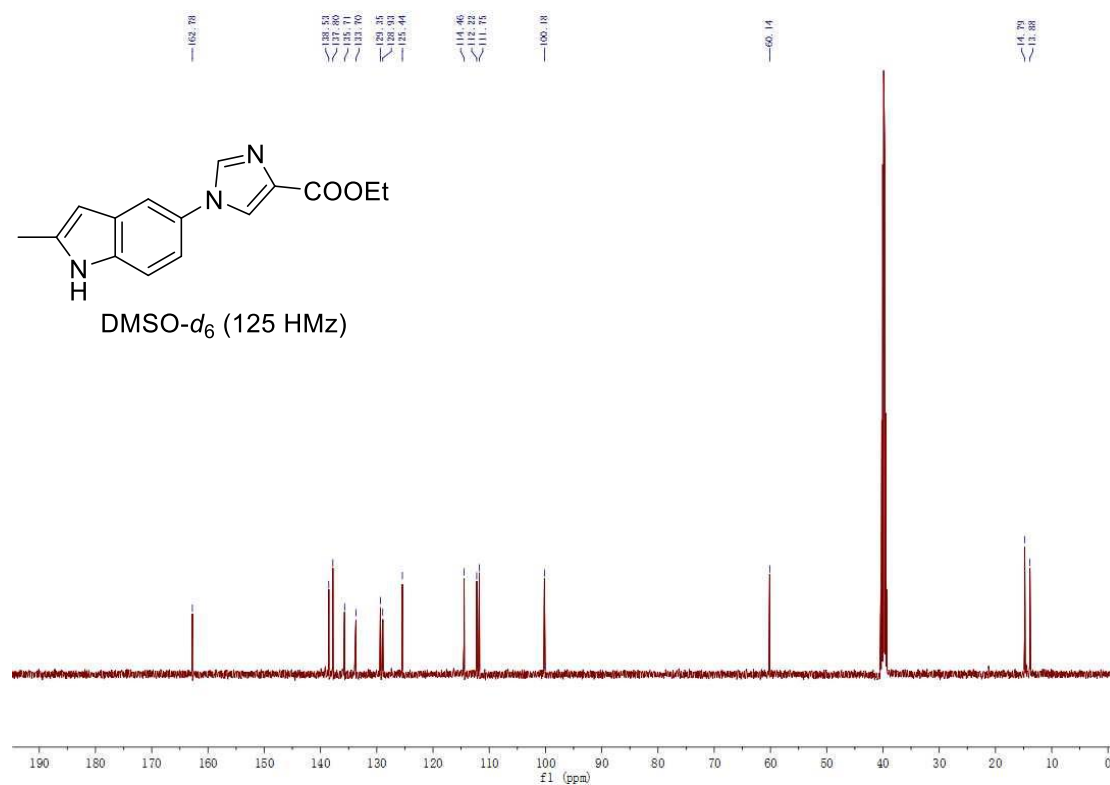

ethyl 1-(benzo[d]thiazol-5-yl)-1*H*-imidazole-4-carboxylate (**4z**)

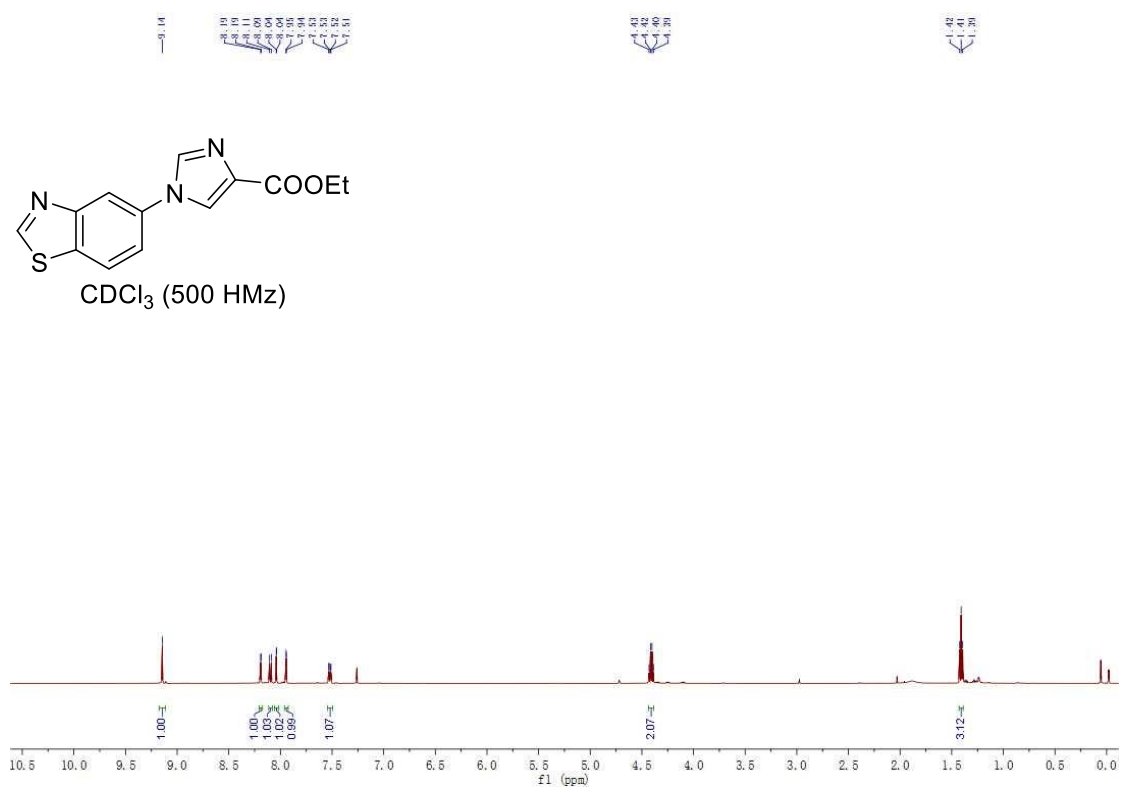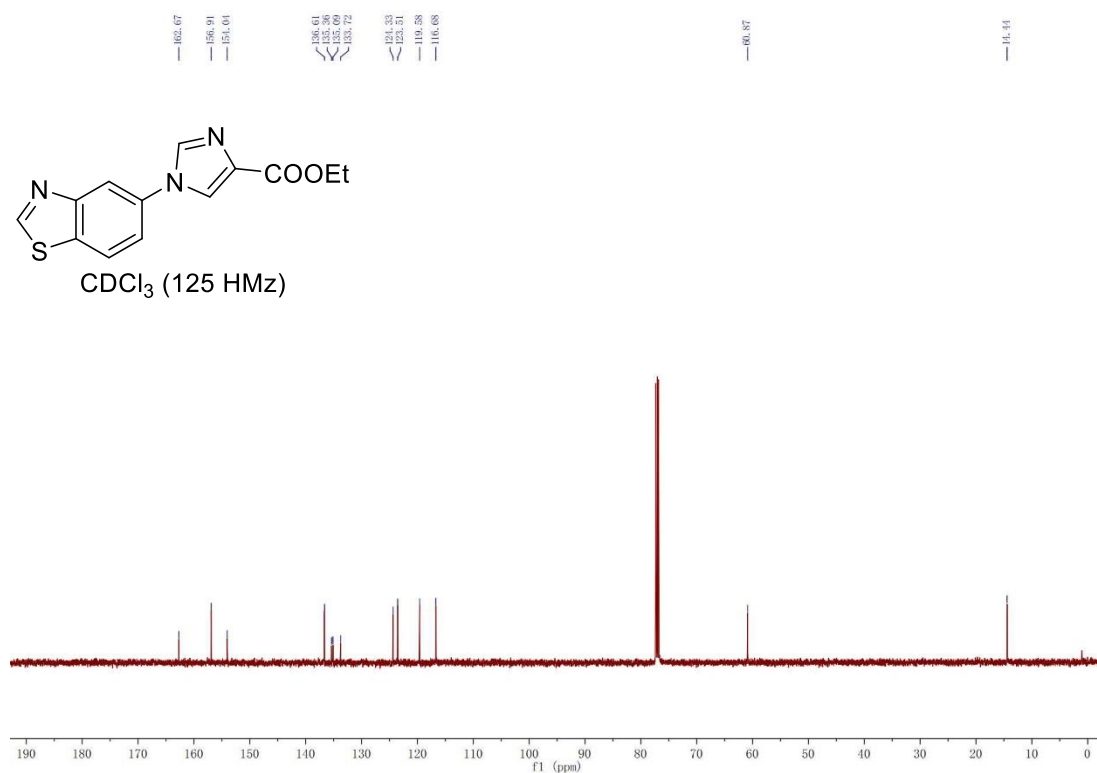

**ethyl 1-(9-ethyl-9H-carbazol-3-yl)-1H-imidazole-4-carboxylate (4aa)**

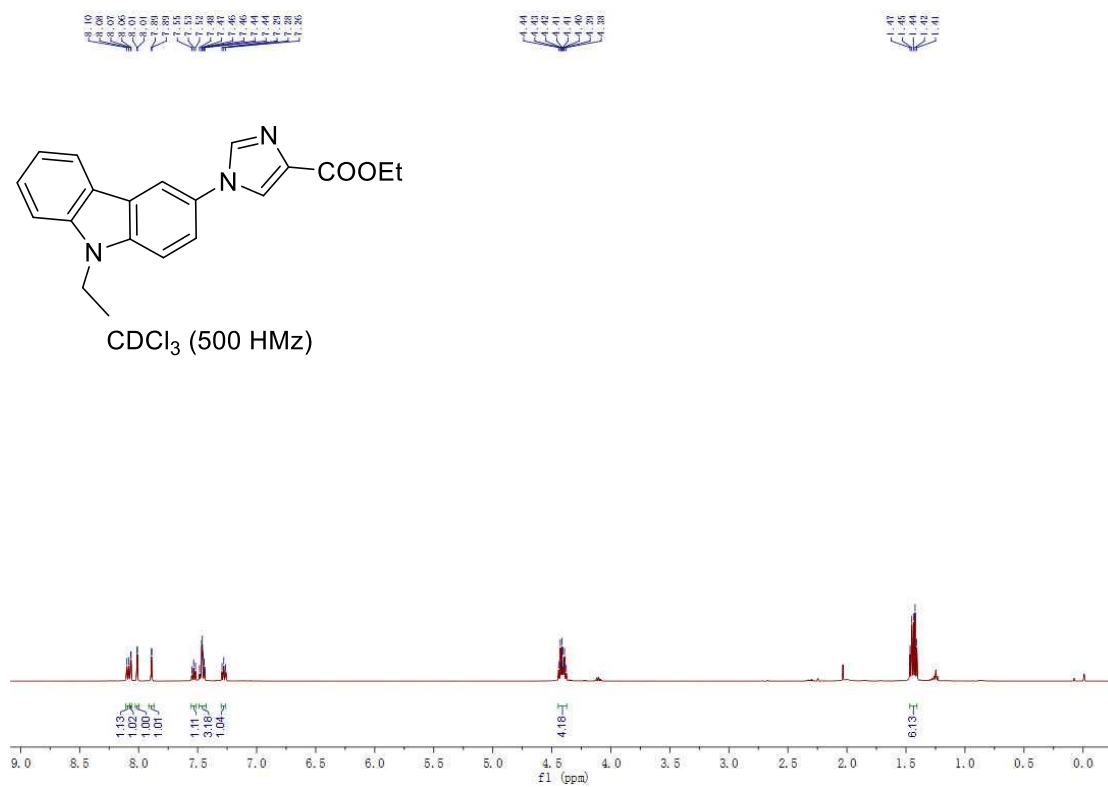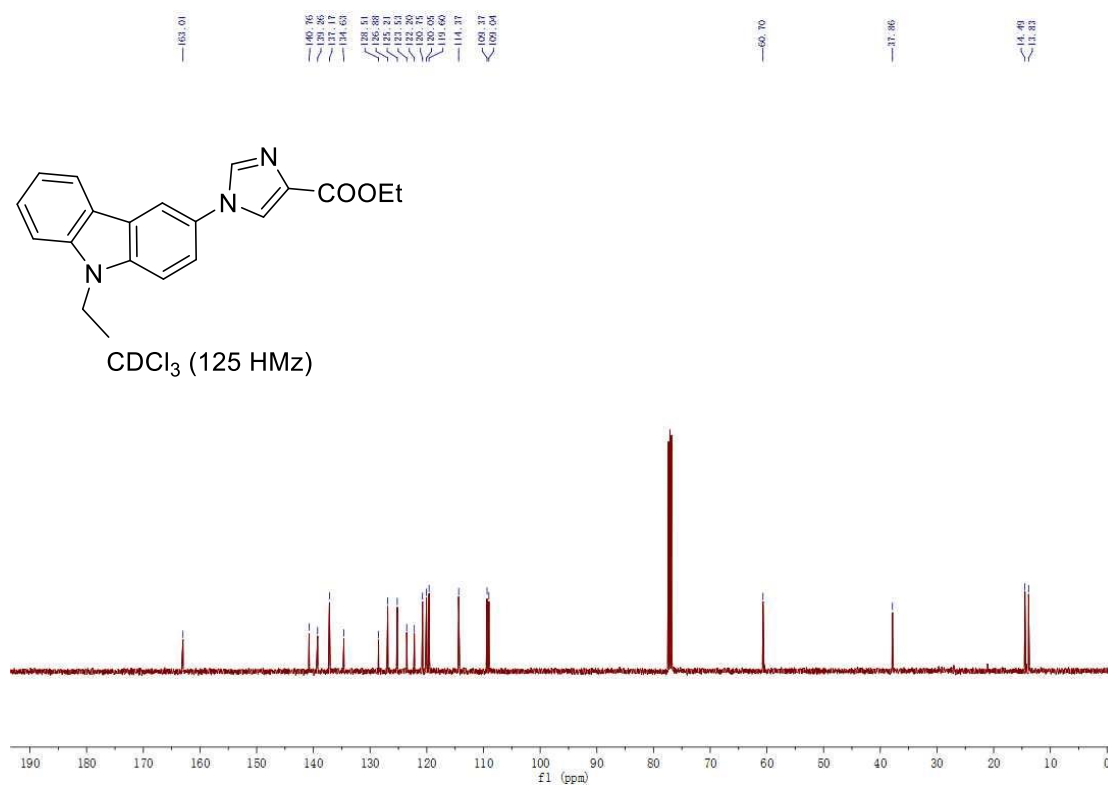



**methyl 1-(3,4-dimethylphenyl)-1*H*-imidazole-4-carboxylate (4ab)**

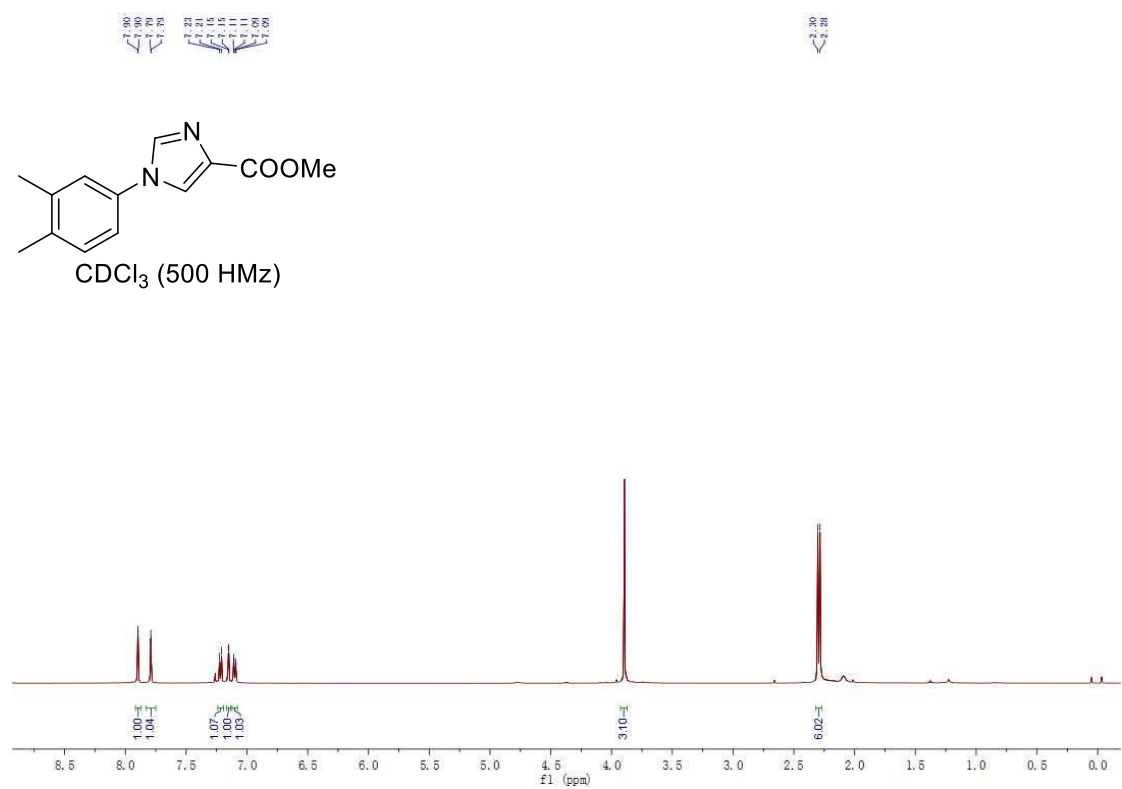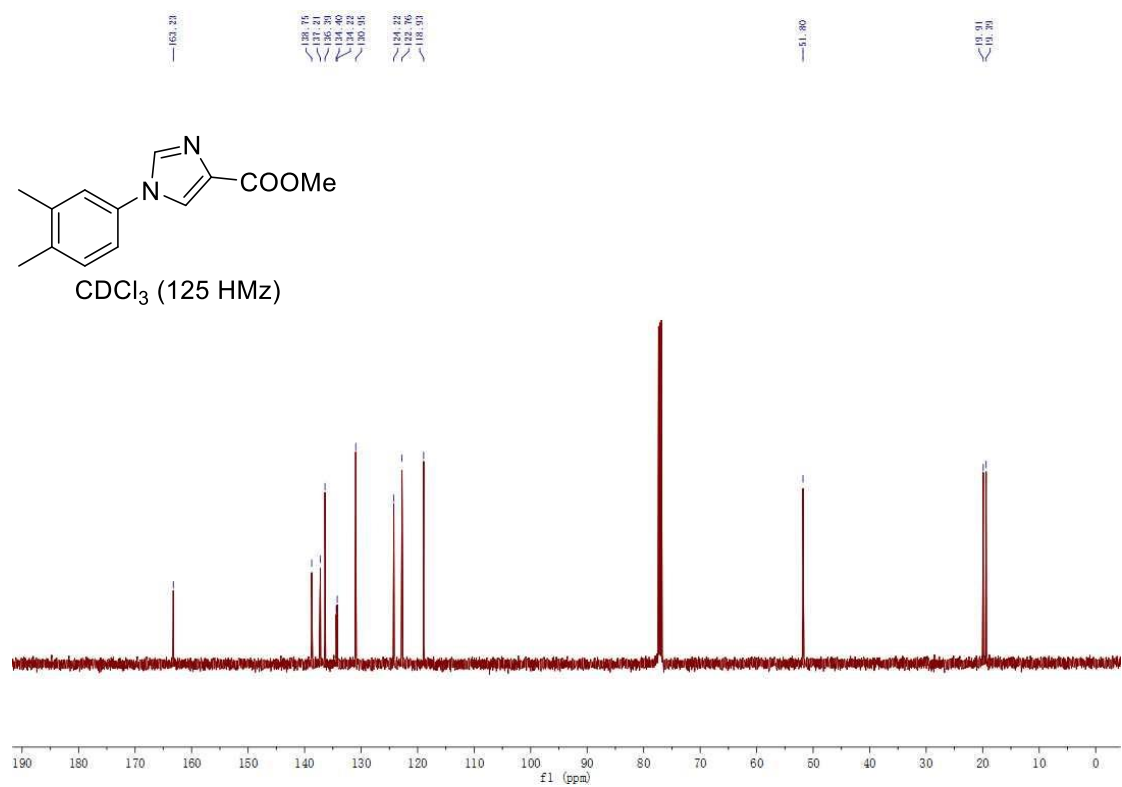

# **1-(*p*-tolyl)-1*H*-tetrazole (6a)**

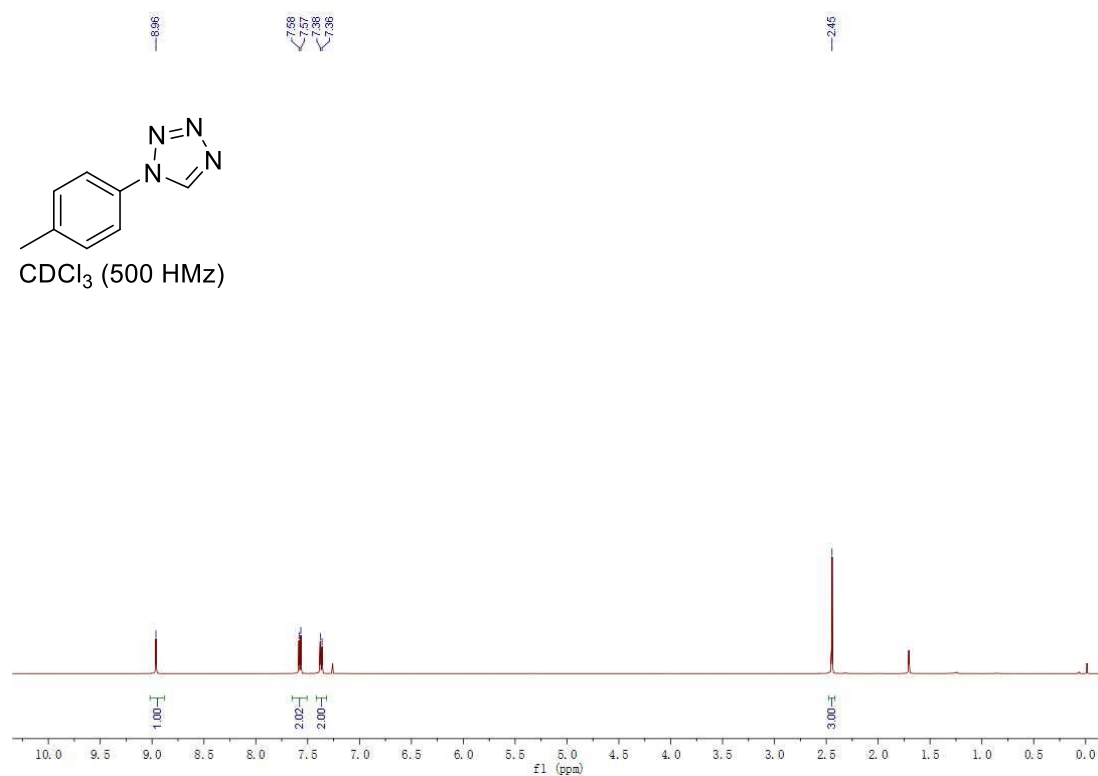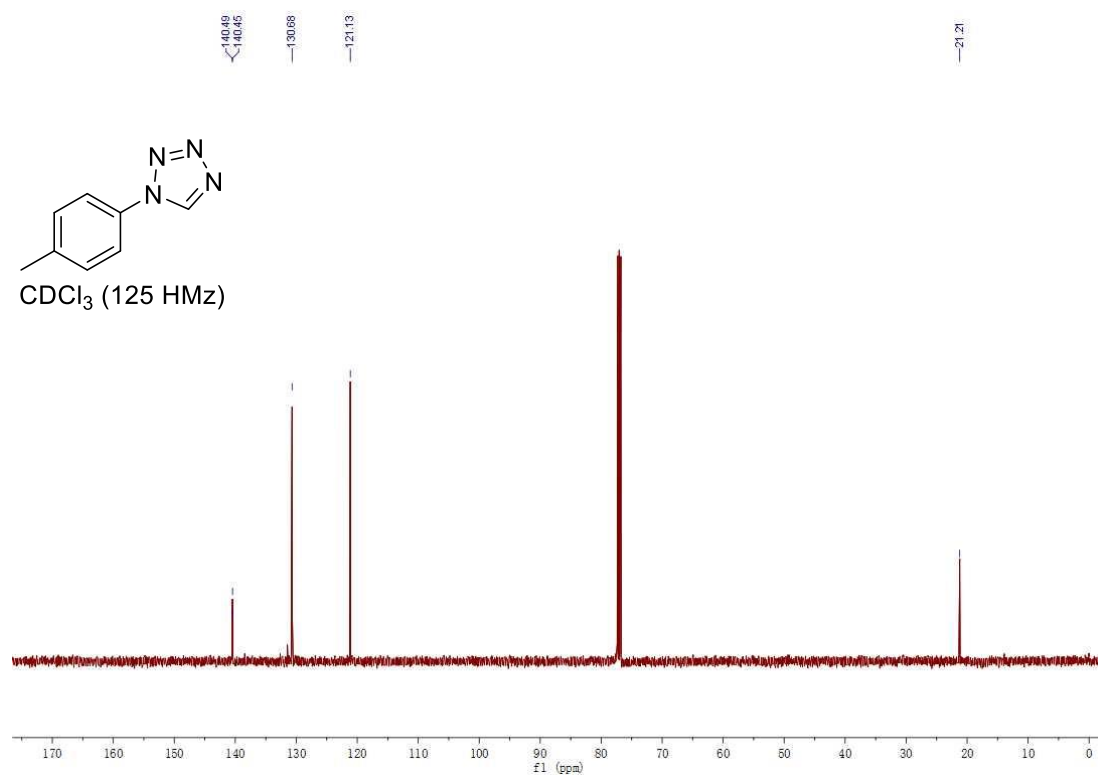

**1-(4-(*tert*-butyl)phenyl)-1*H*-tetrazole (6b)**

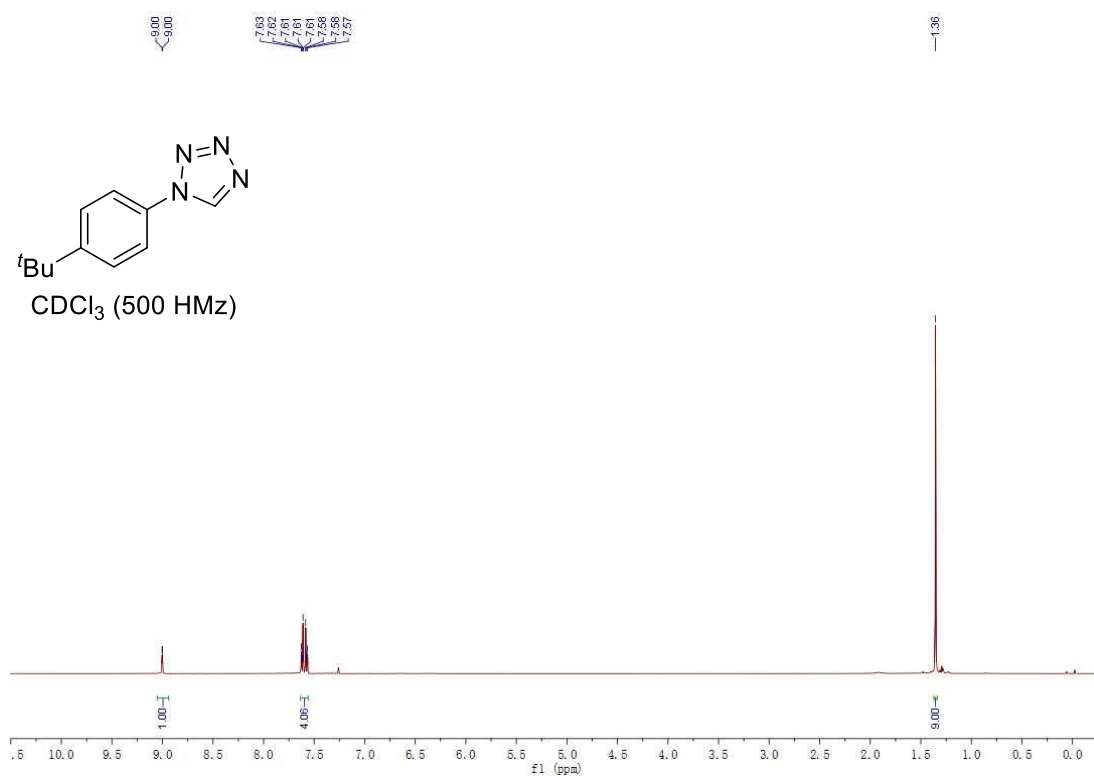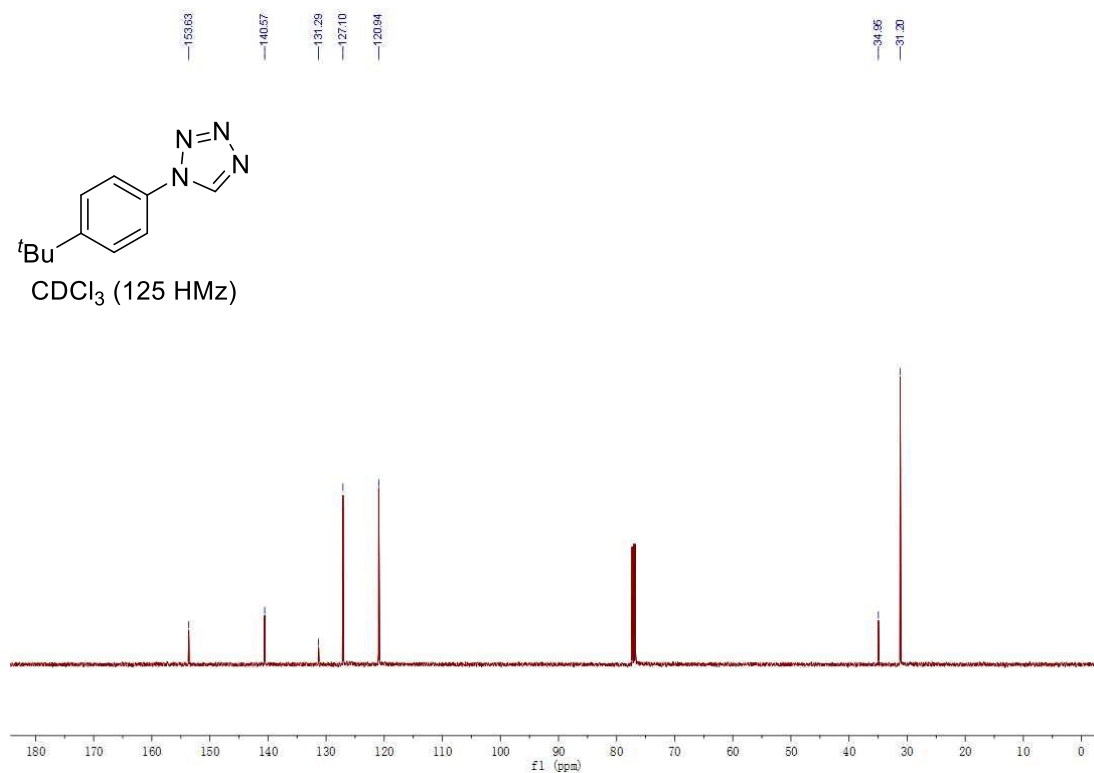

# 1-(4-isopropylphenyl)-1H-tetrazole (6c)

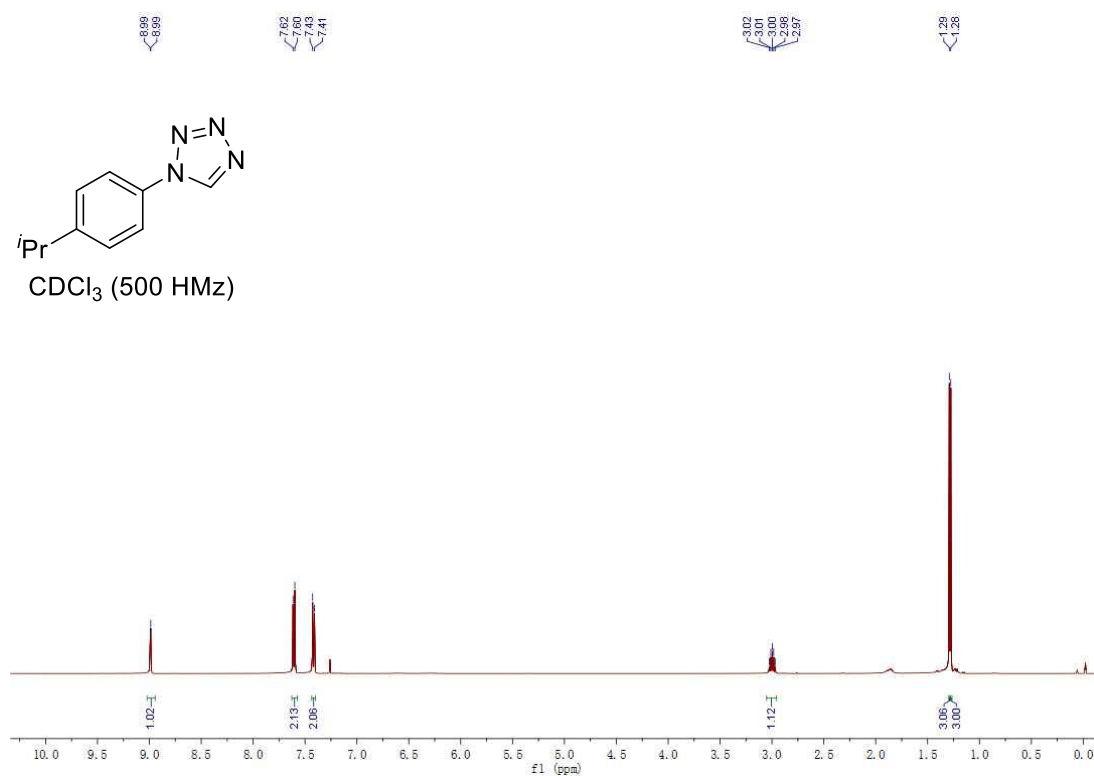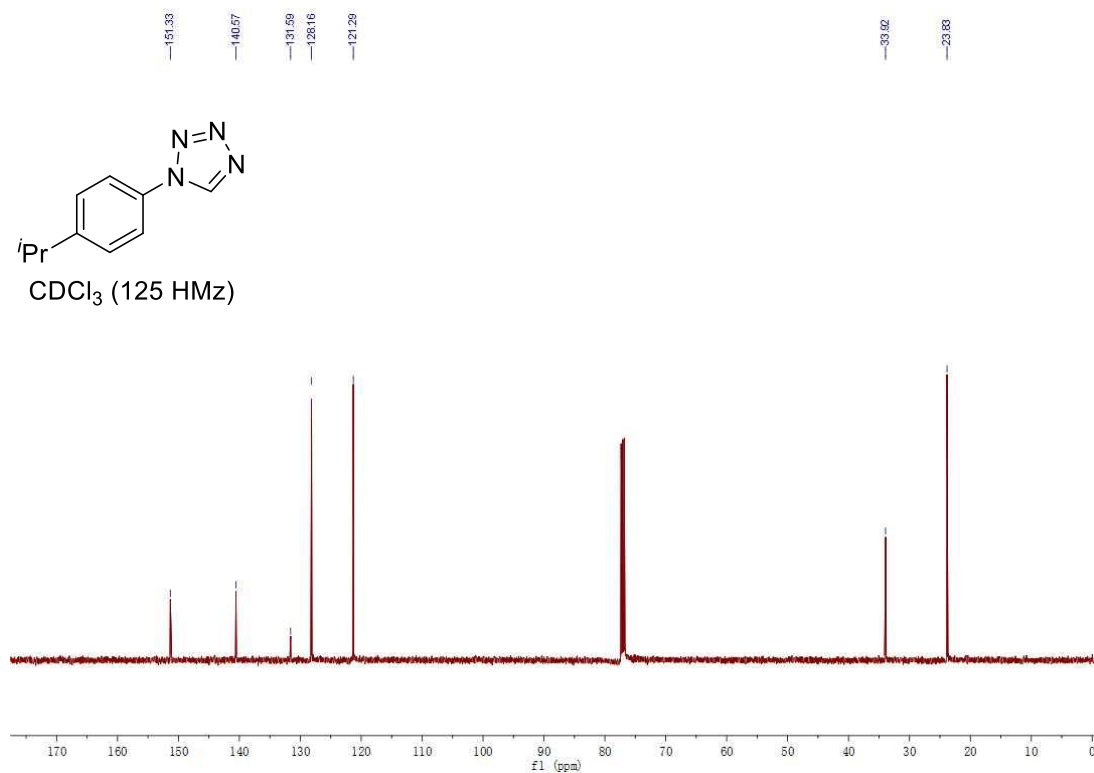

# 1-(4-propylphenyl)-1H-tetrazole (6d)

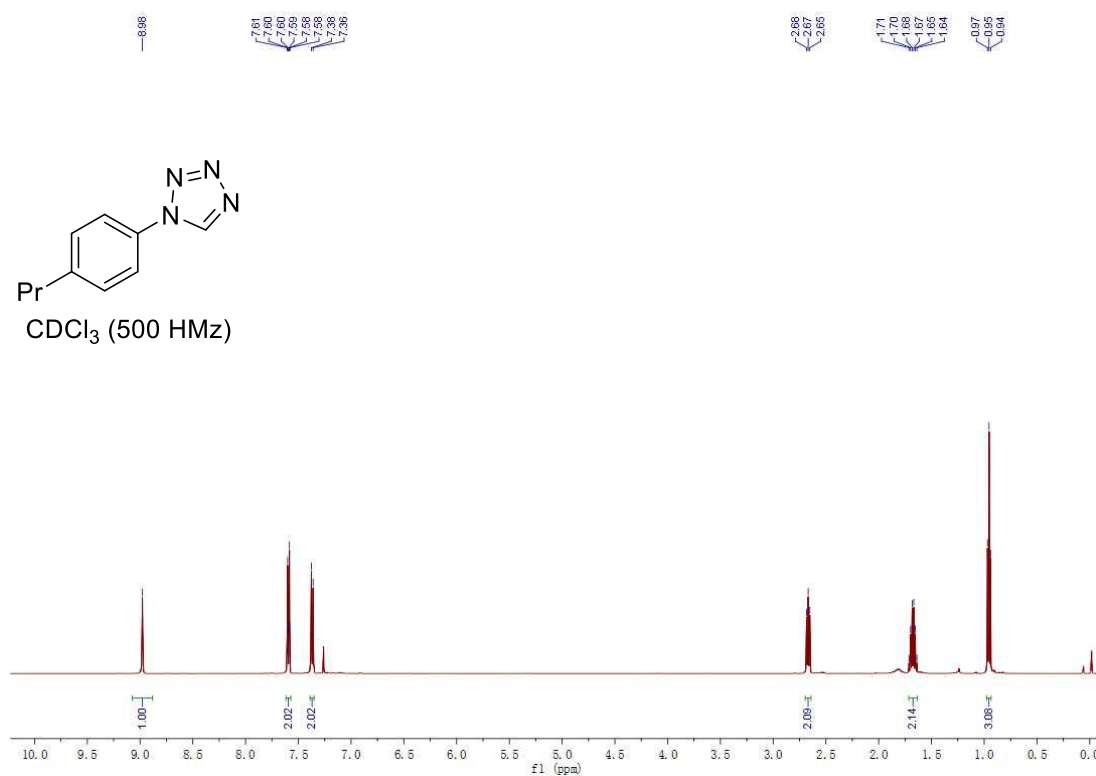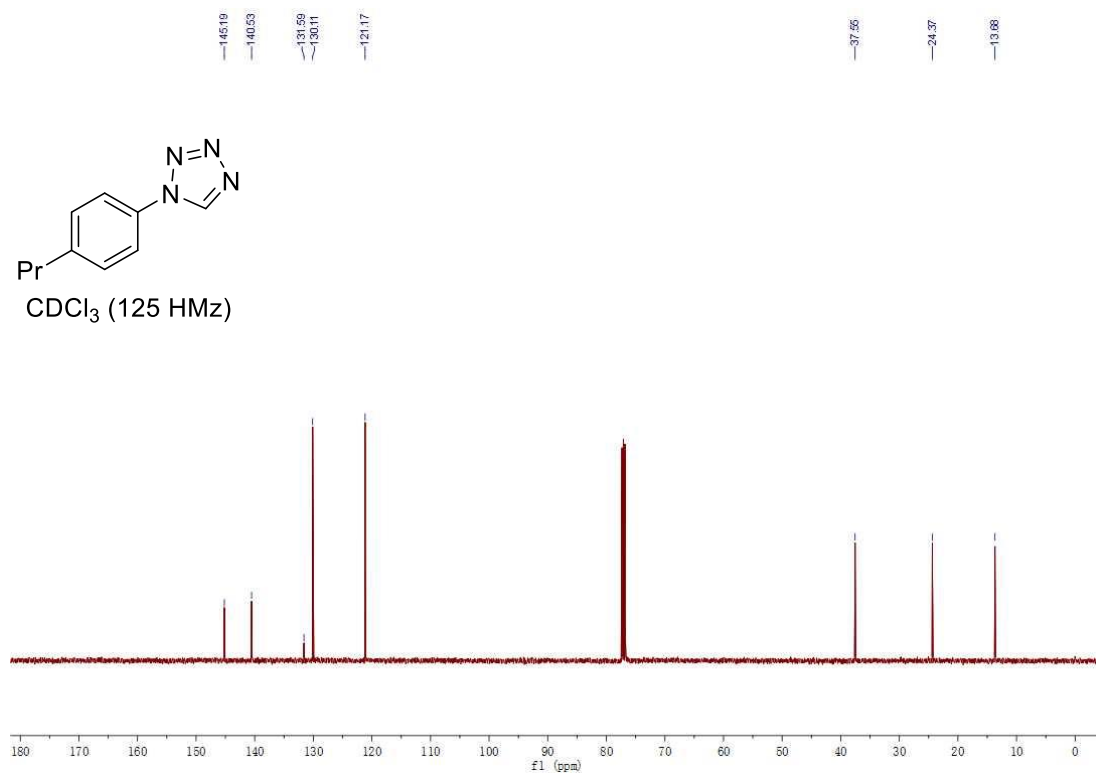

**1-([1,1'-biphenyl]-4-yl)-1*H*-tetrazole (6e)**

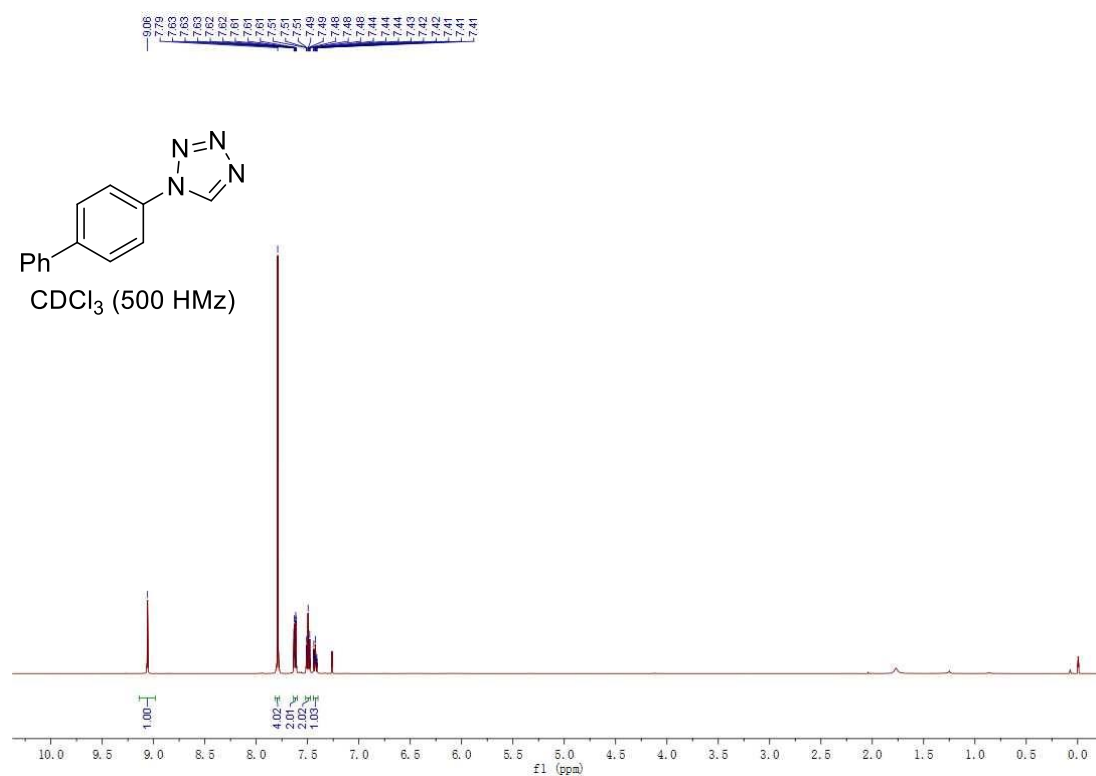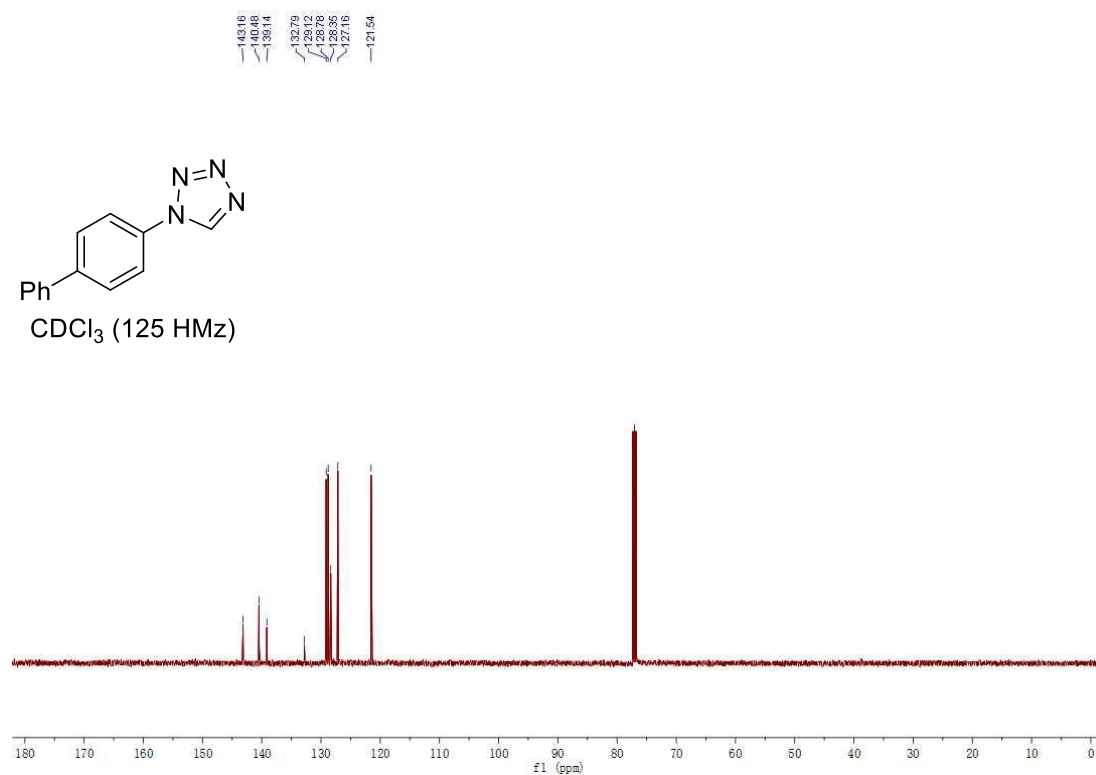

# **1-(4-methoxyphenyl)-1H-tetrazole (6f)**

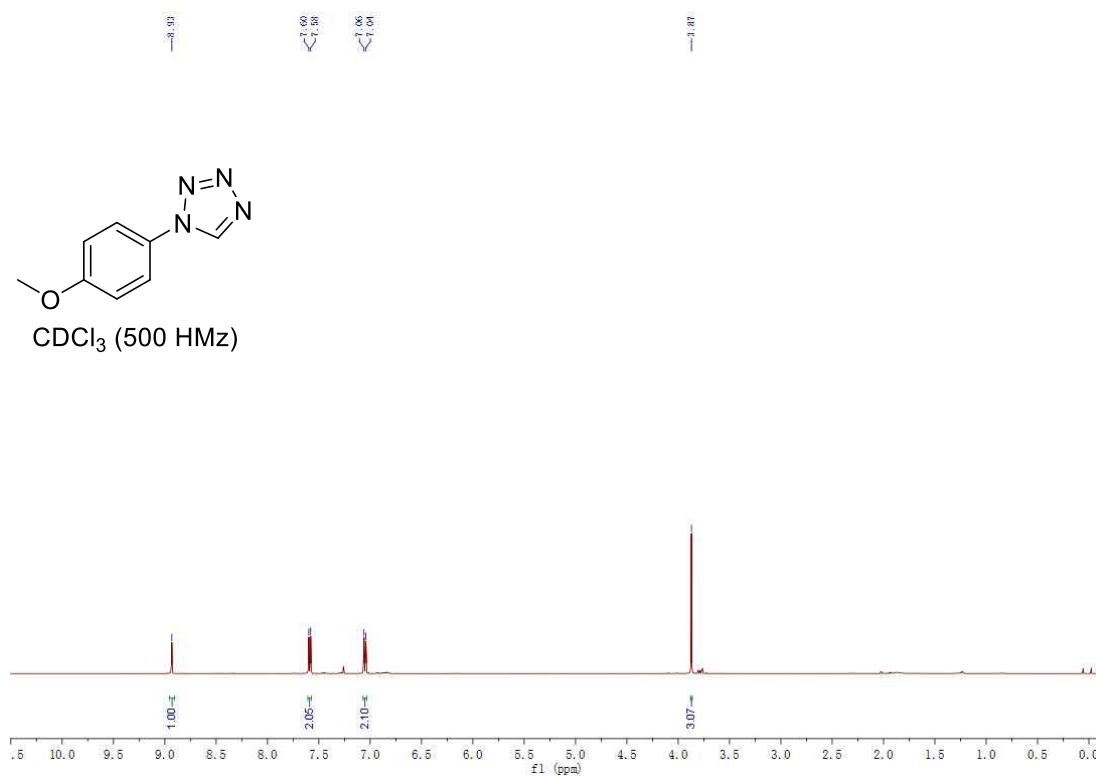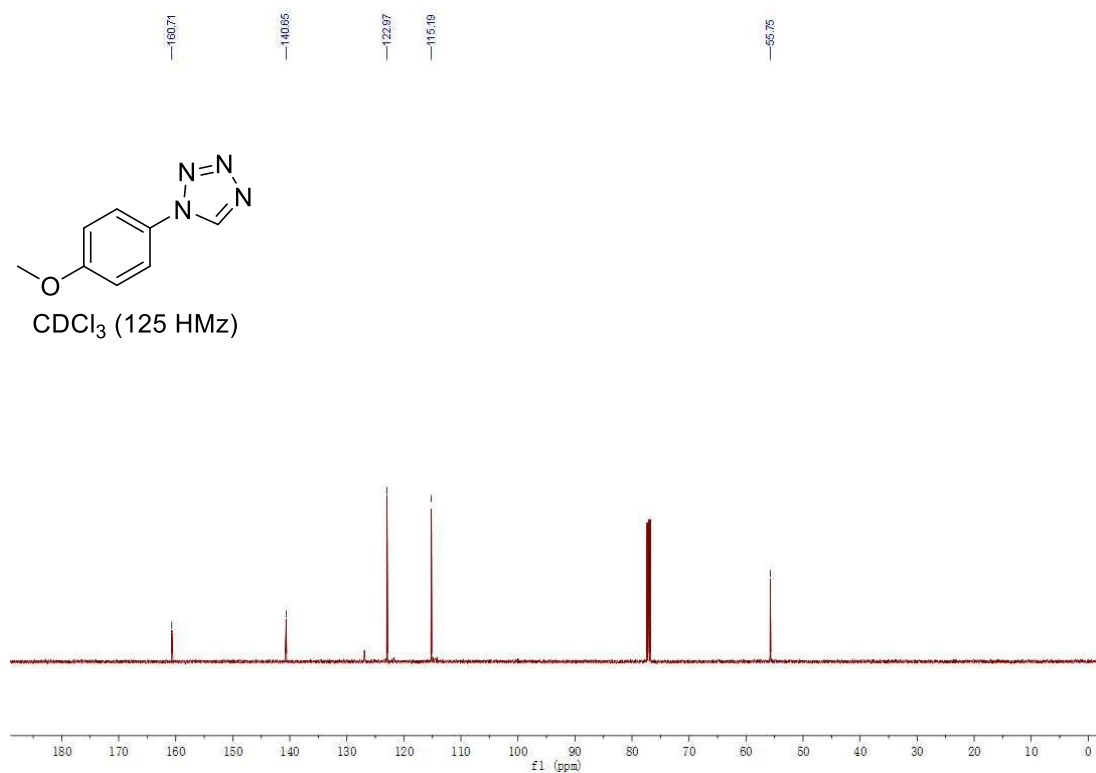

# 1-(4-(methylthio)phenyl)-1H-tetrazole (6g)

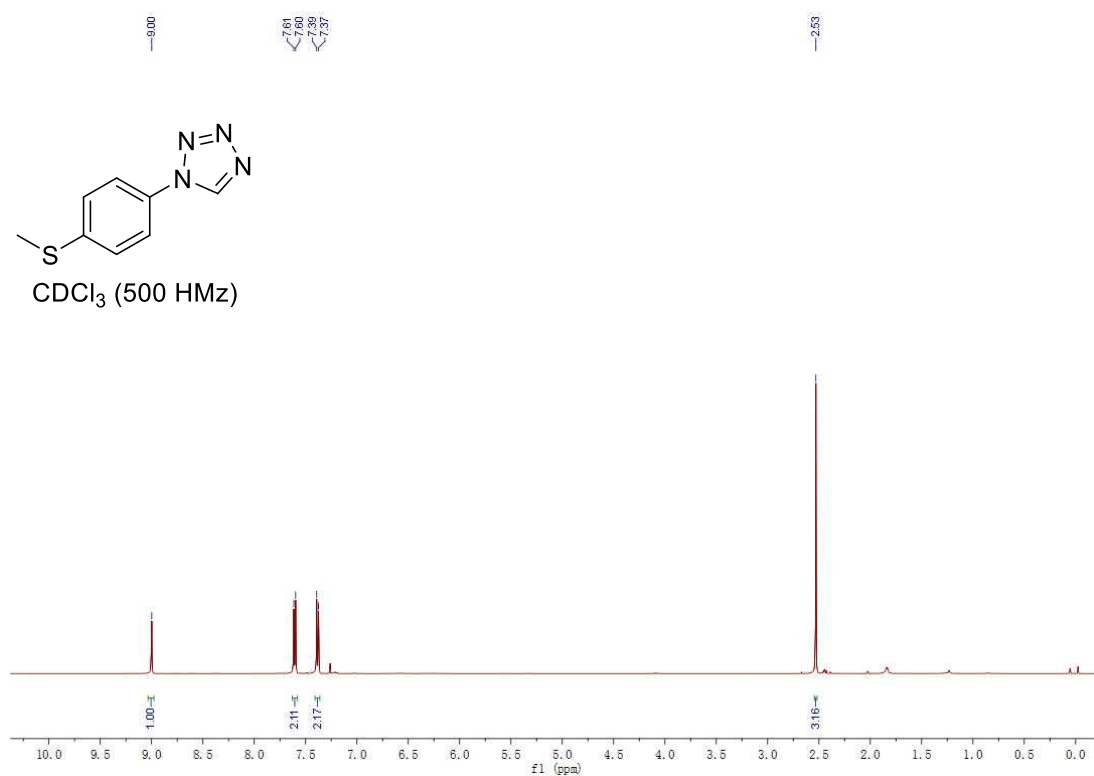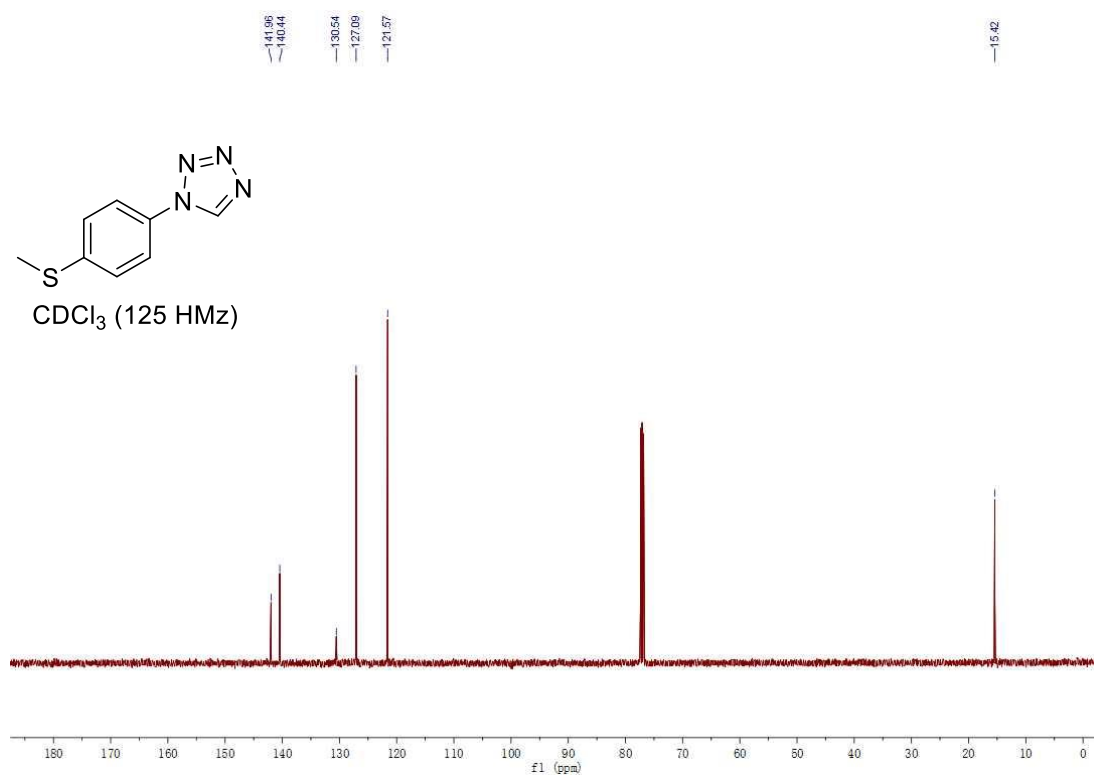



# 1-(4-phenoxyphenyl)-1H-tetrazole (6h)

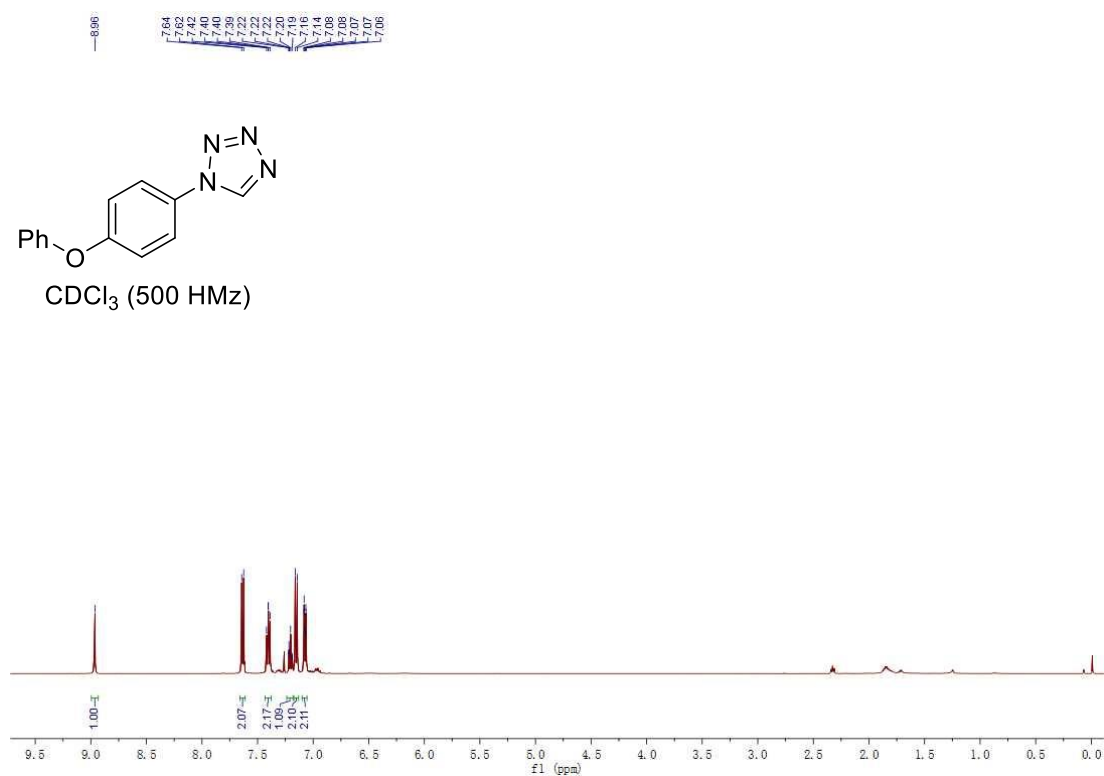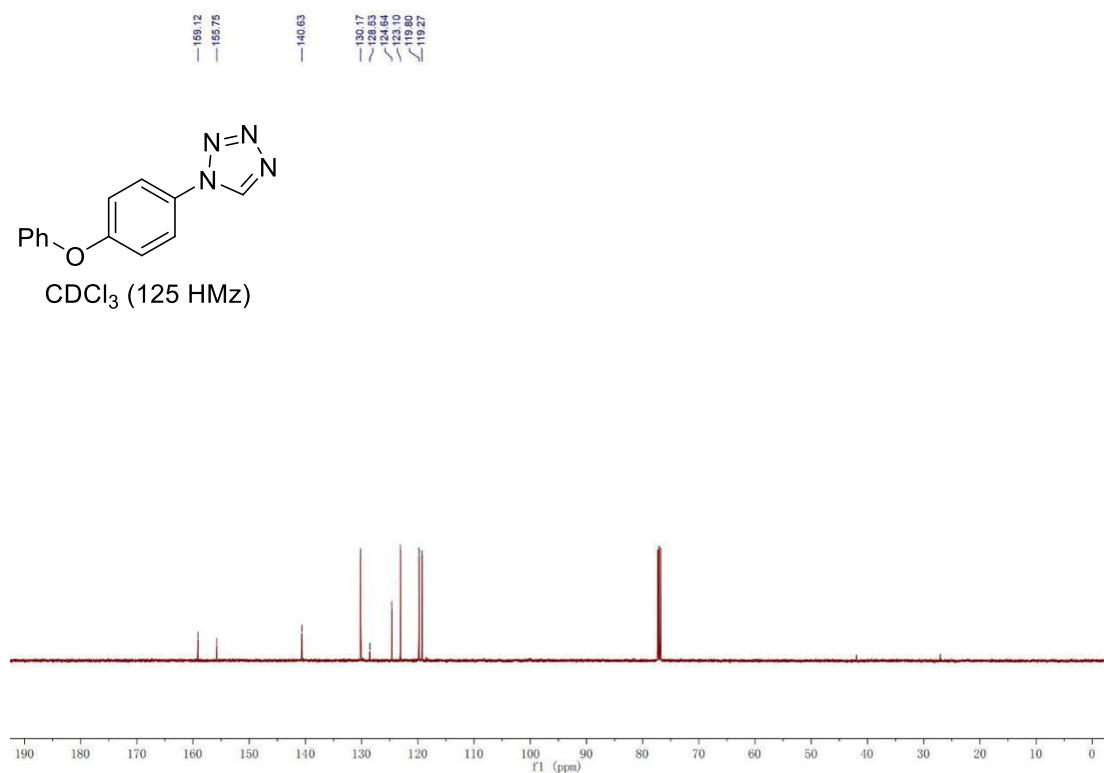

***N,N*-dimethyl-4-(1*H*-tetrazol-1-yl)aniline (6i)**

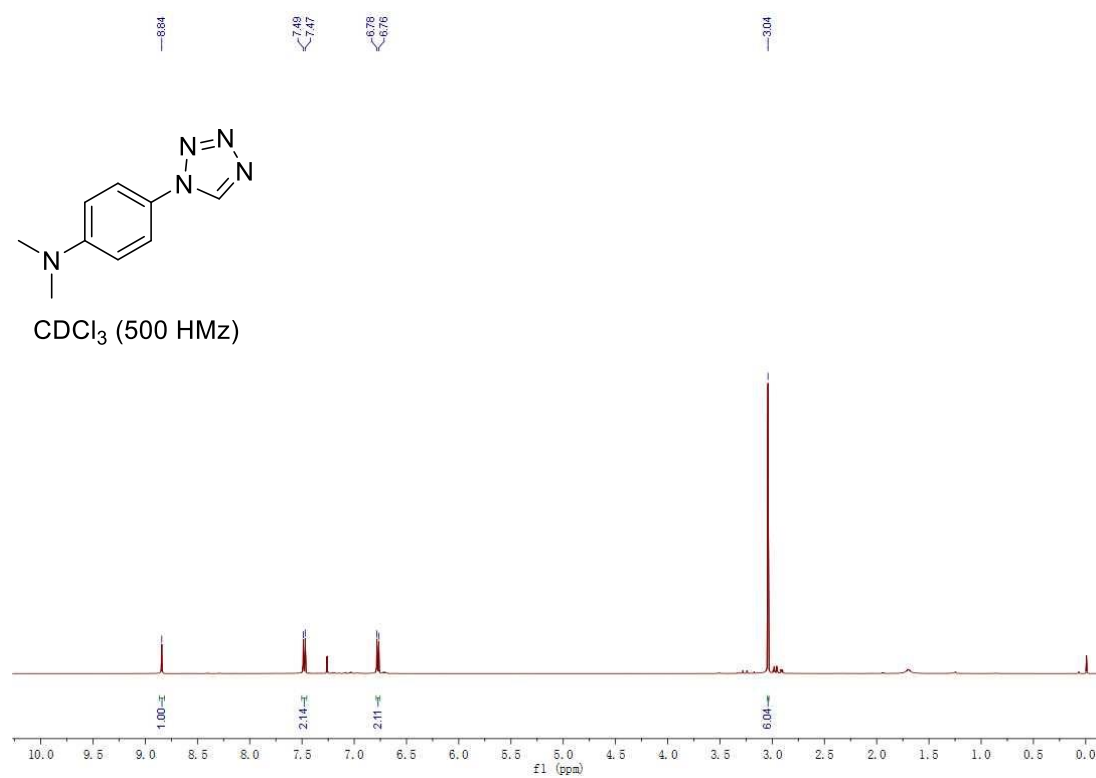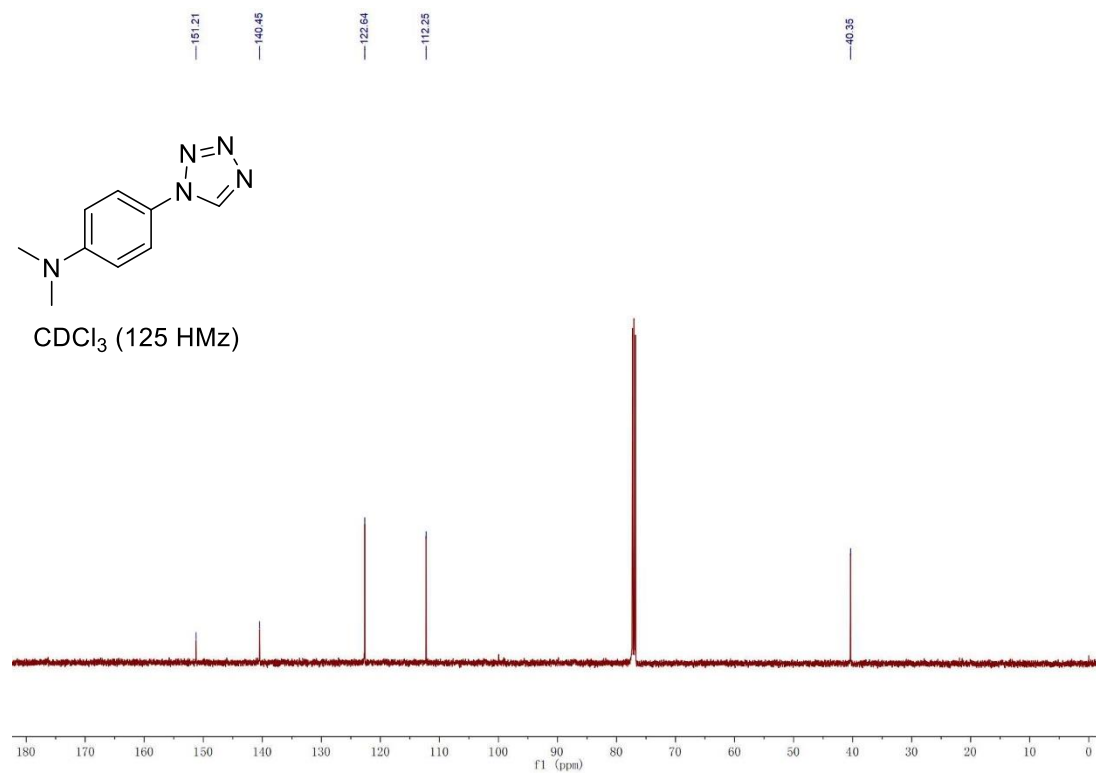

ethyl 4-(1*H*-tetrazol-1-yl)benzoate (6j)

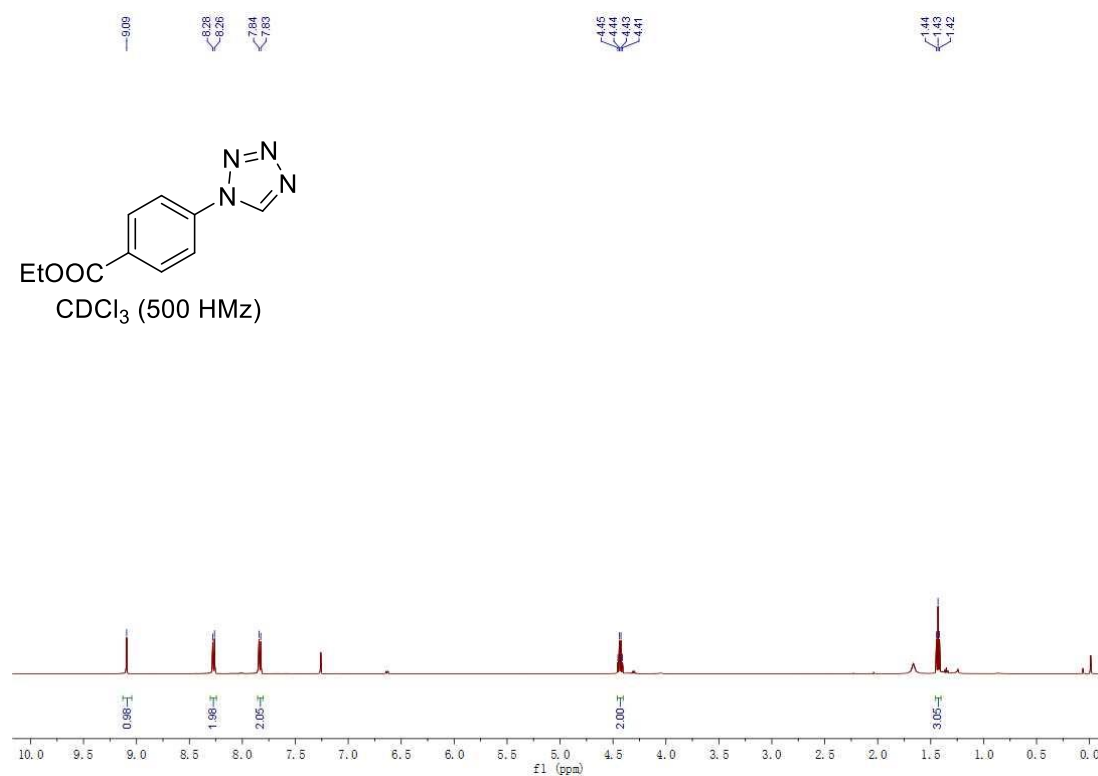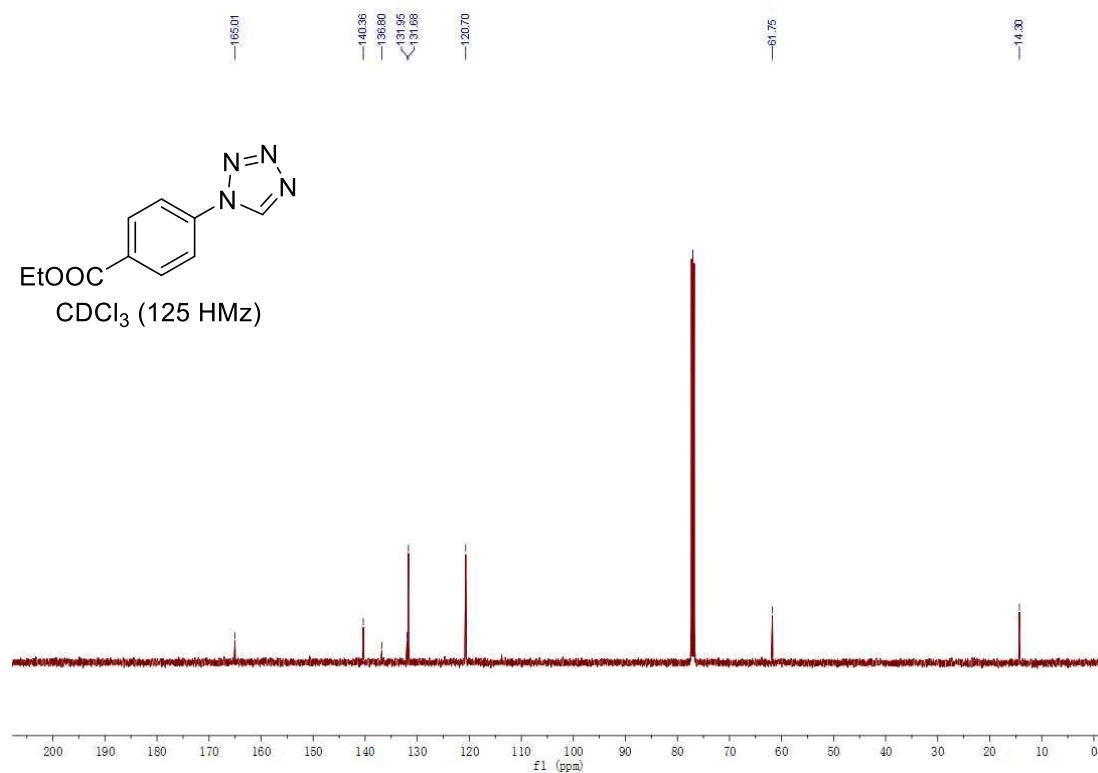

# 1-(4-bromophenyl)-1H-tetrazole (6k)

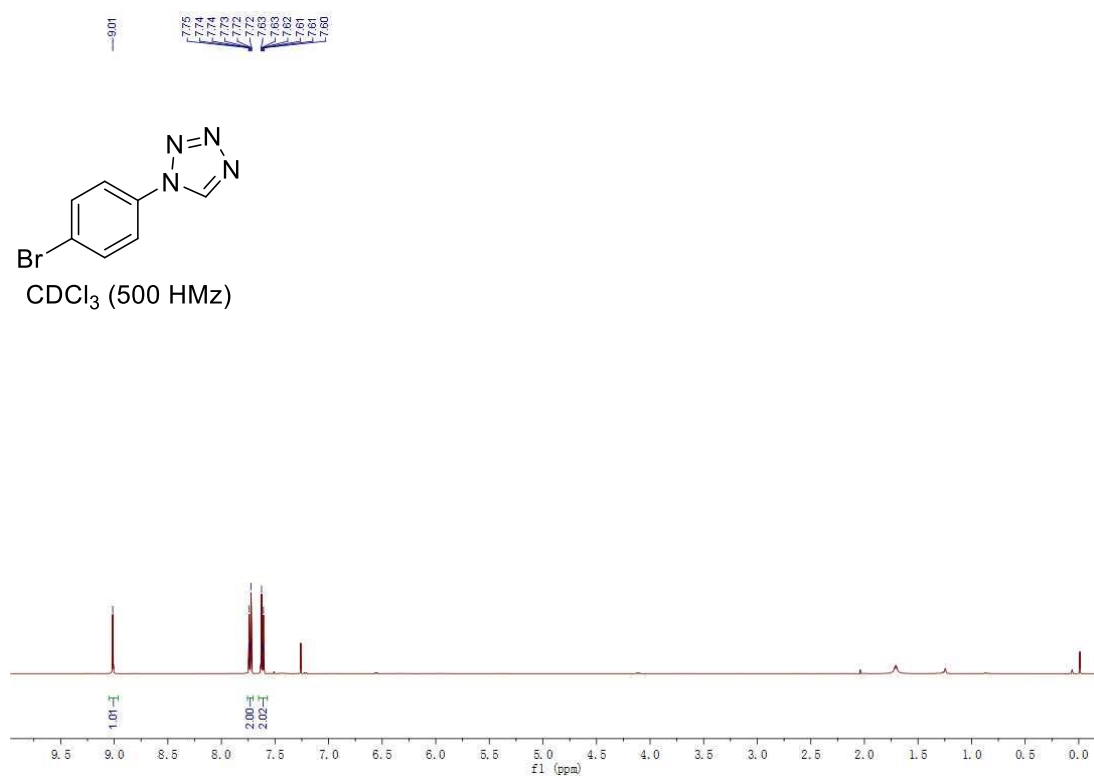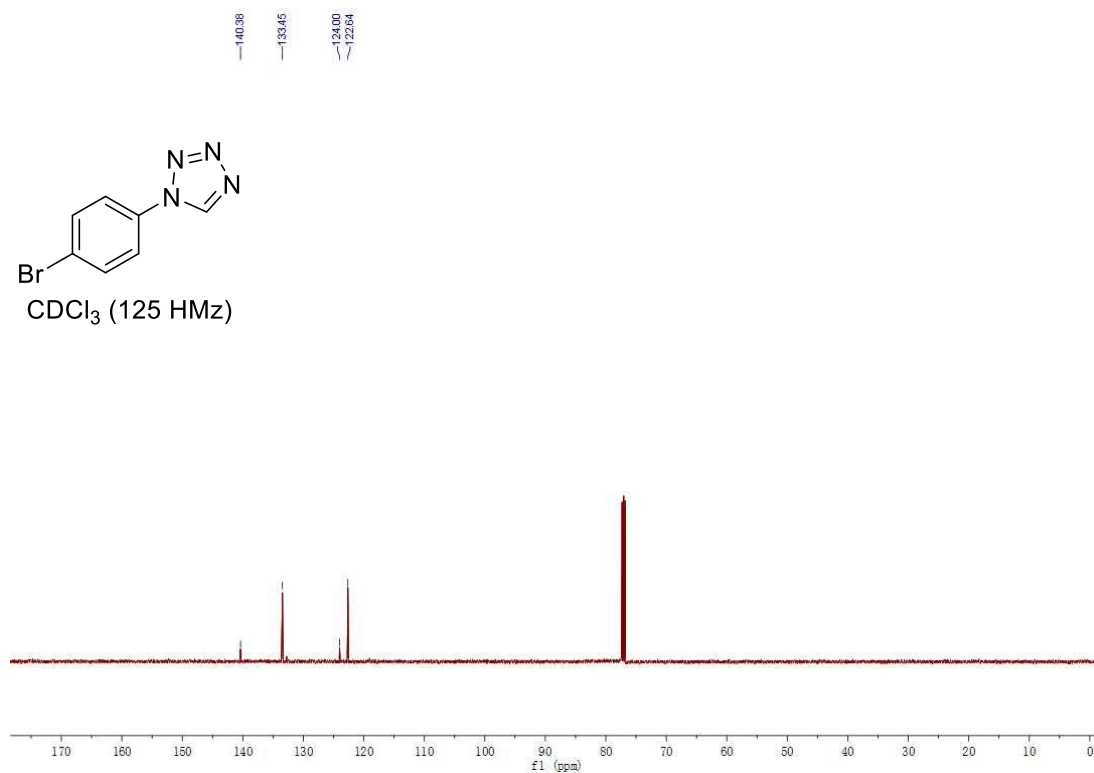

# 1-(4-fluorophenyl)-1H-tetrazole (6l)

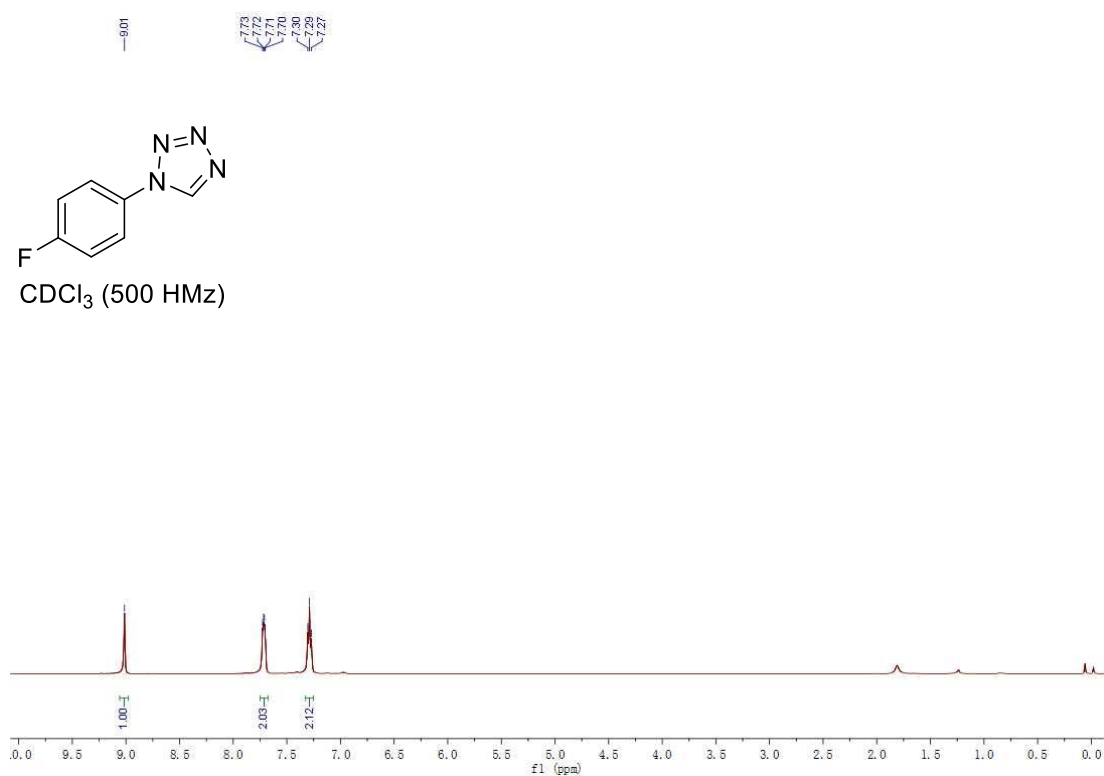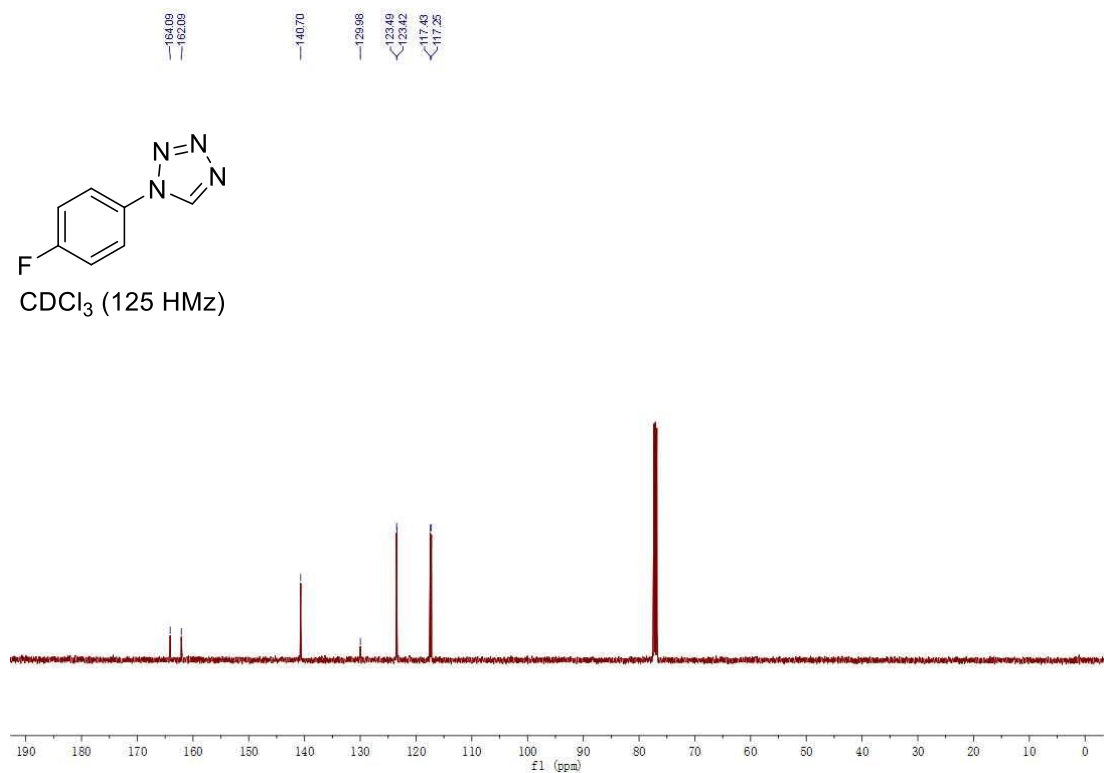

# 1-(4-chlorophenyl)-1H-tetrazole (6m)

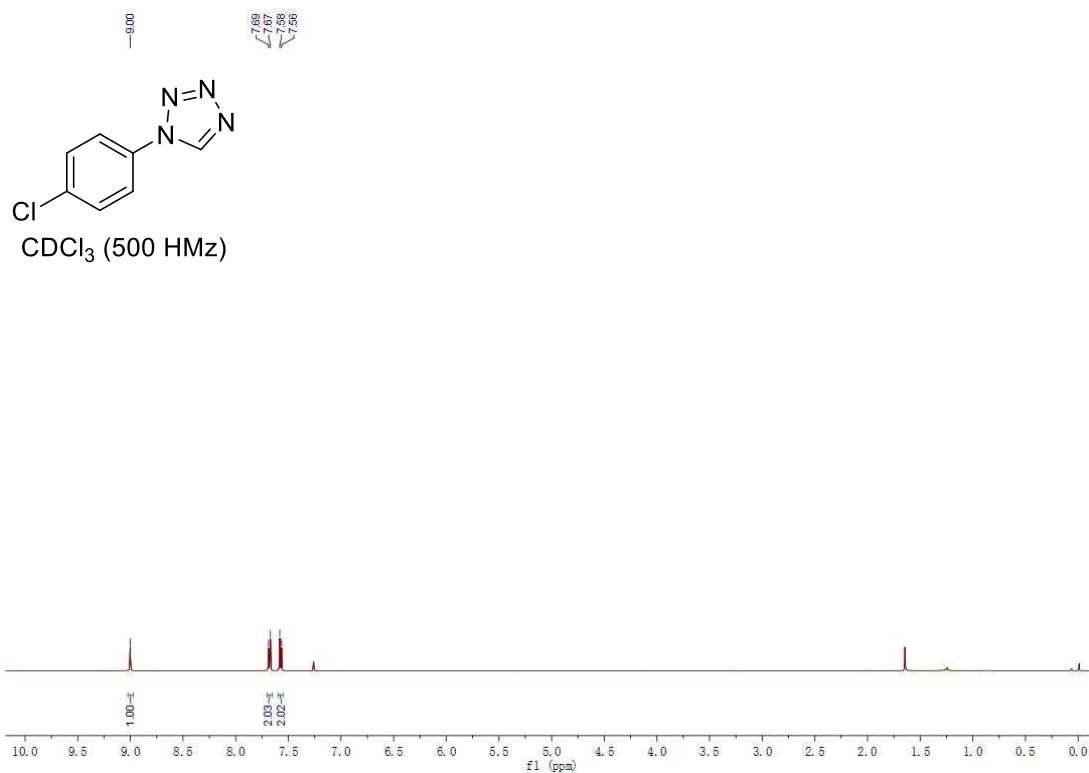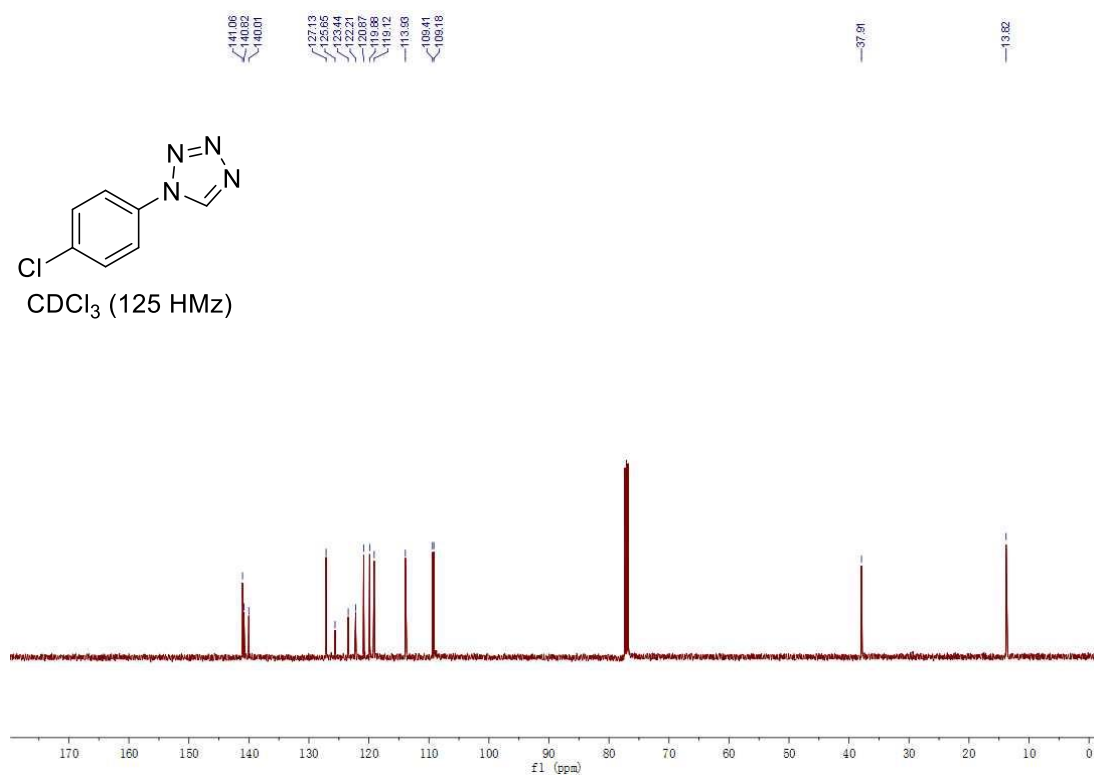

# 1-(3,4-dimethoxyphenyl)-1H-tetrazole (6n)

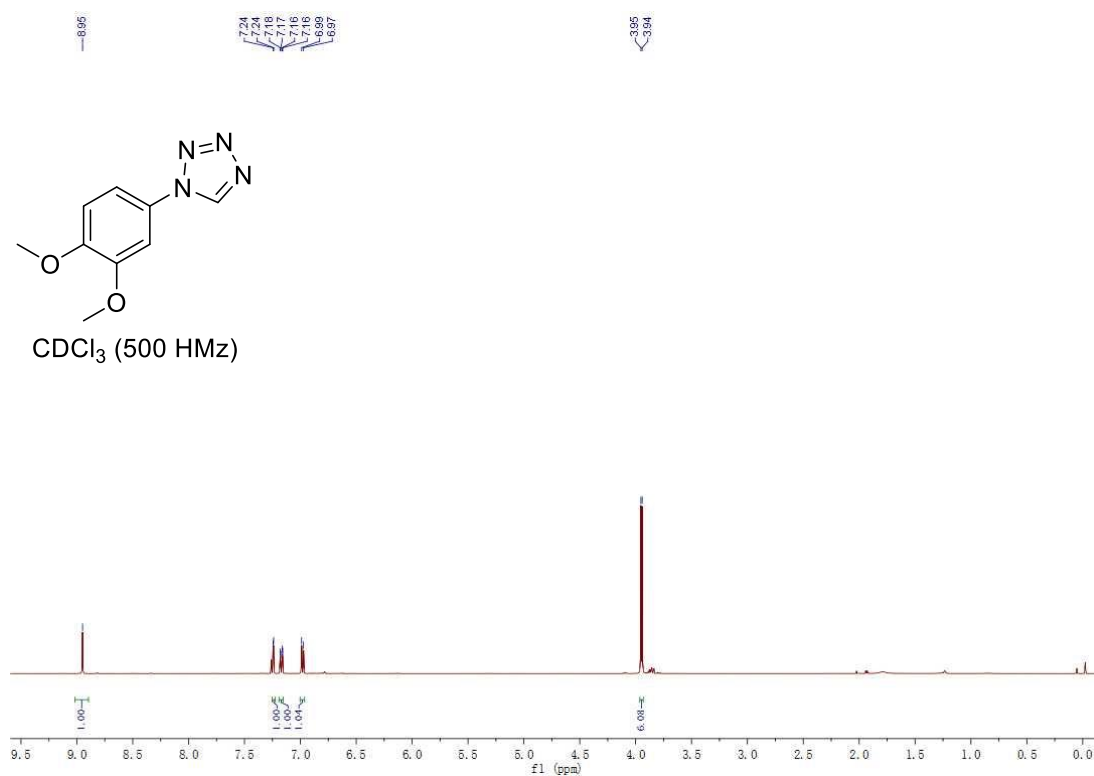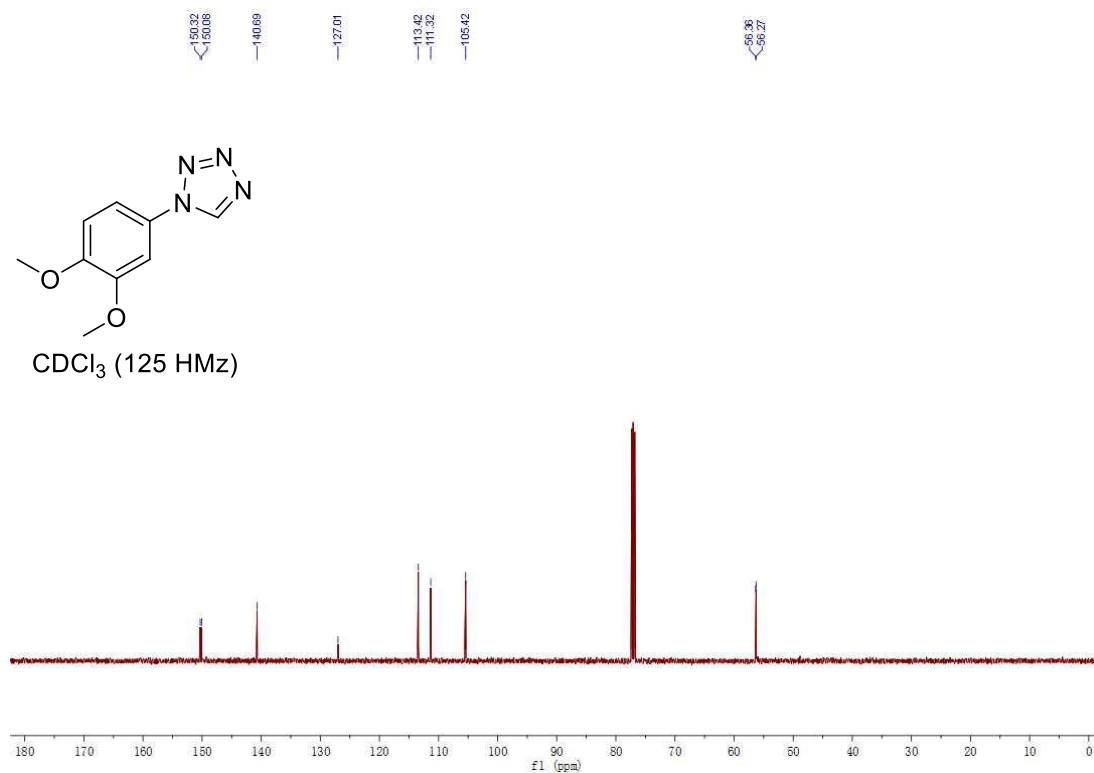

**2-methyl-5-(1H-tetrazol-1-yl)-1H-indole (6o)**

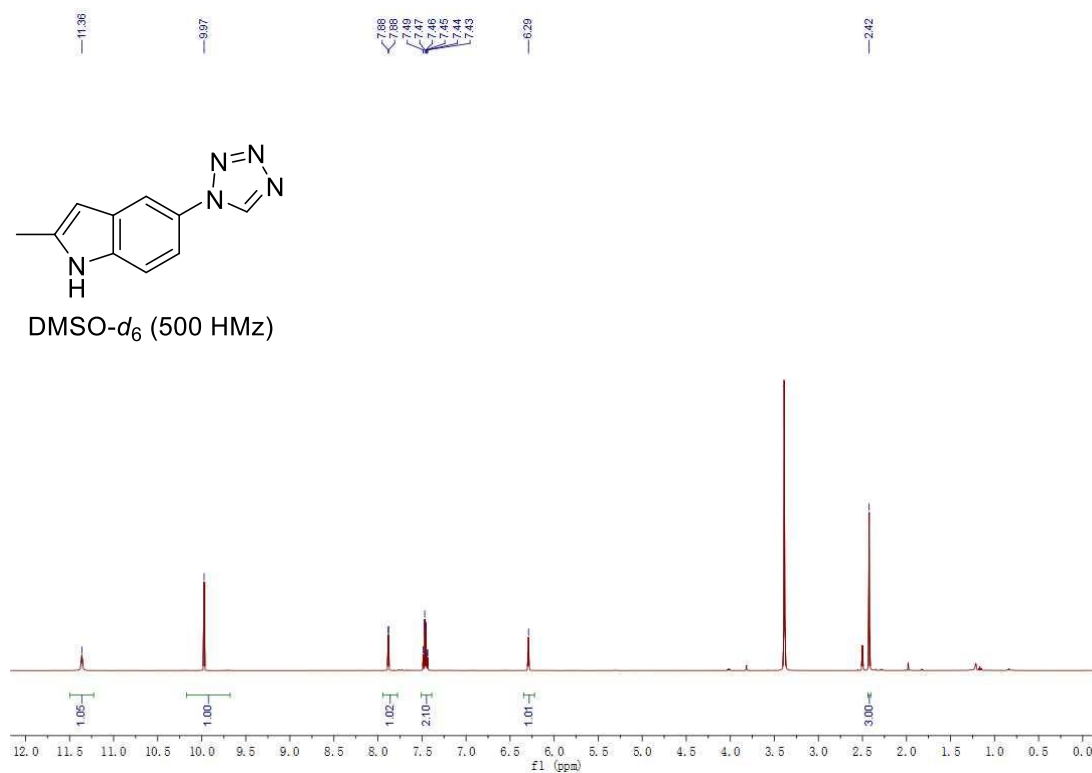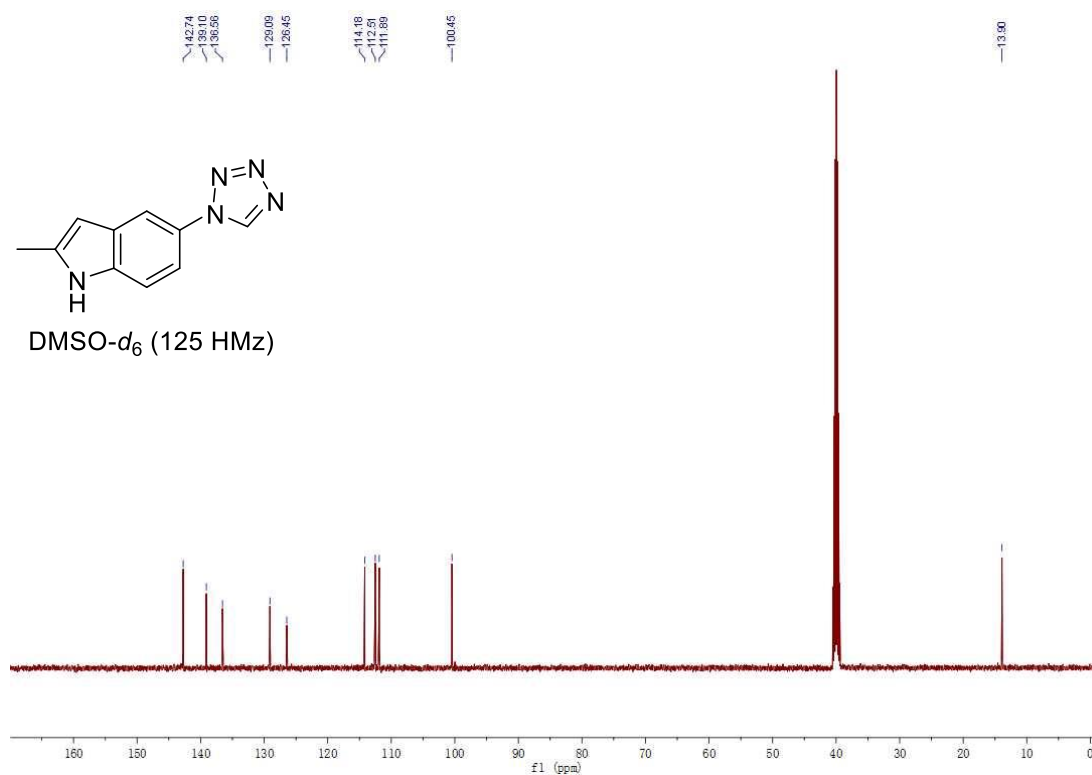



**9-ethyl-3-(1H-tetrazol-1-yl)-9H-carbazole (6p)**

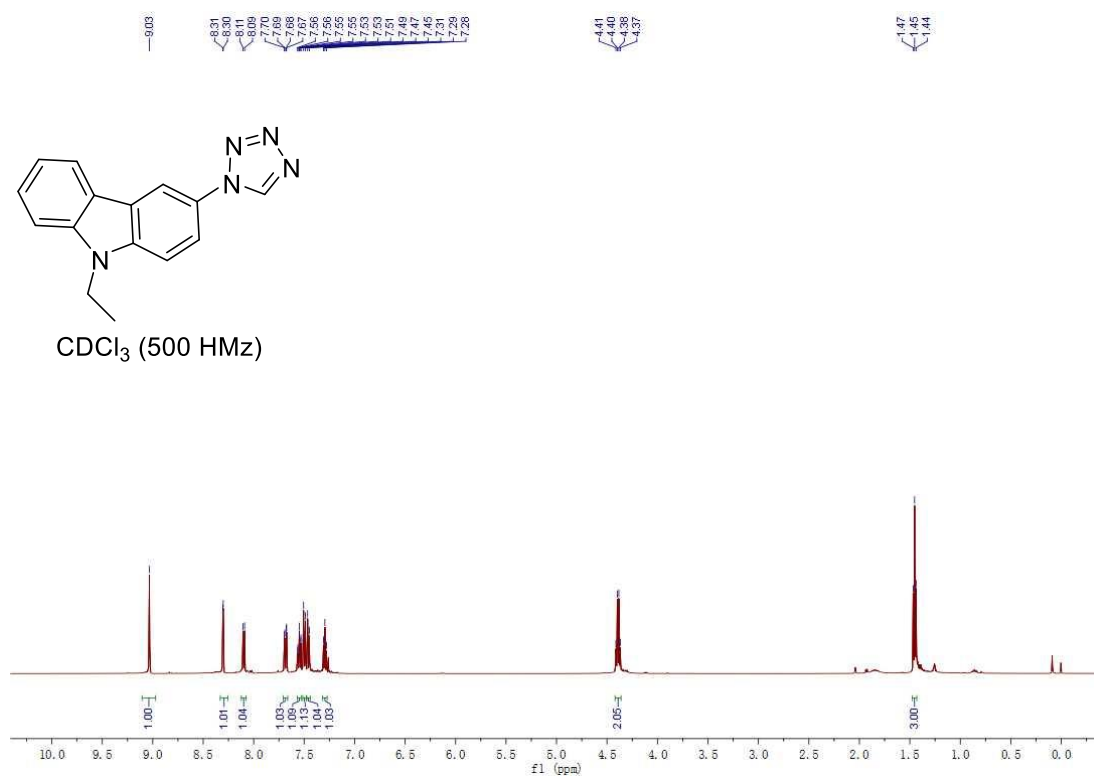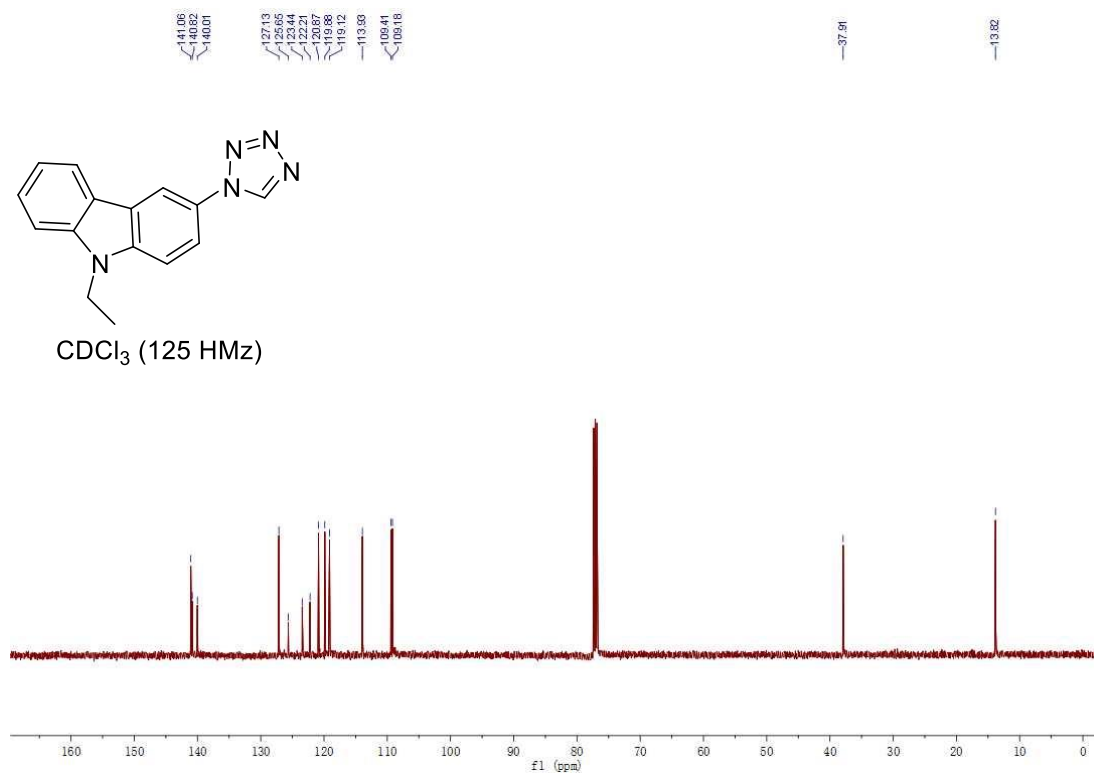

# 1-(naphthalen-2-yl)-1H-tetrazole (6q)

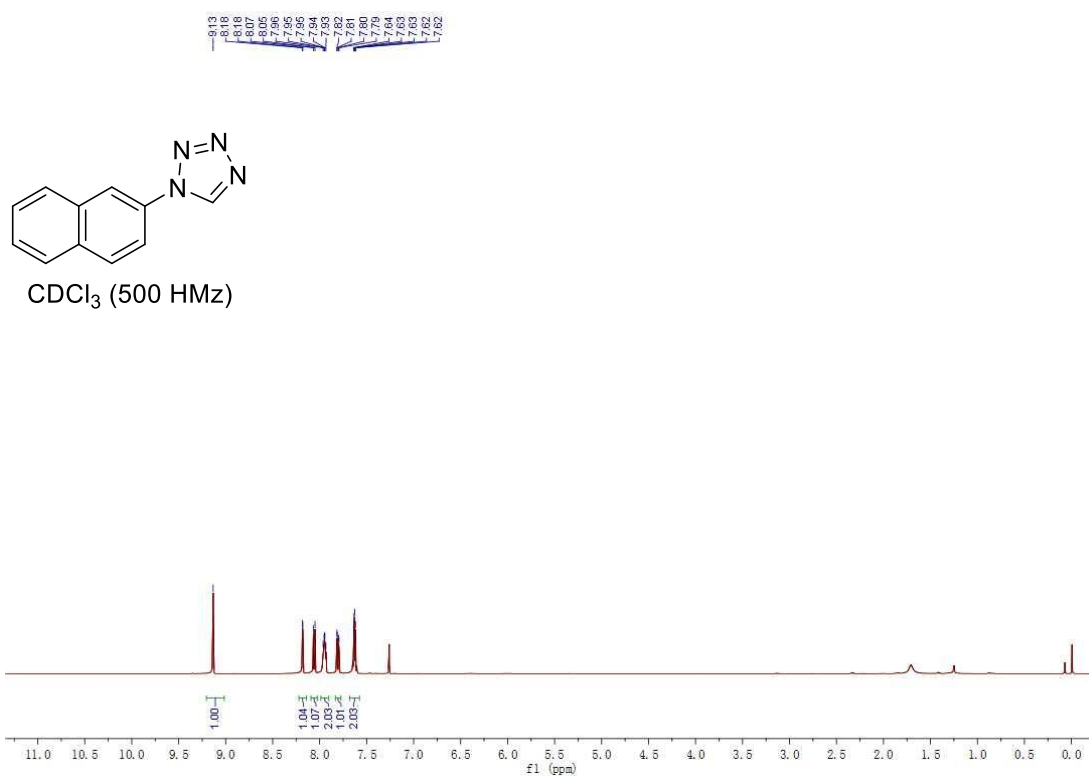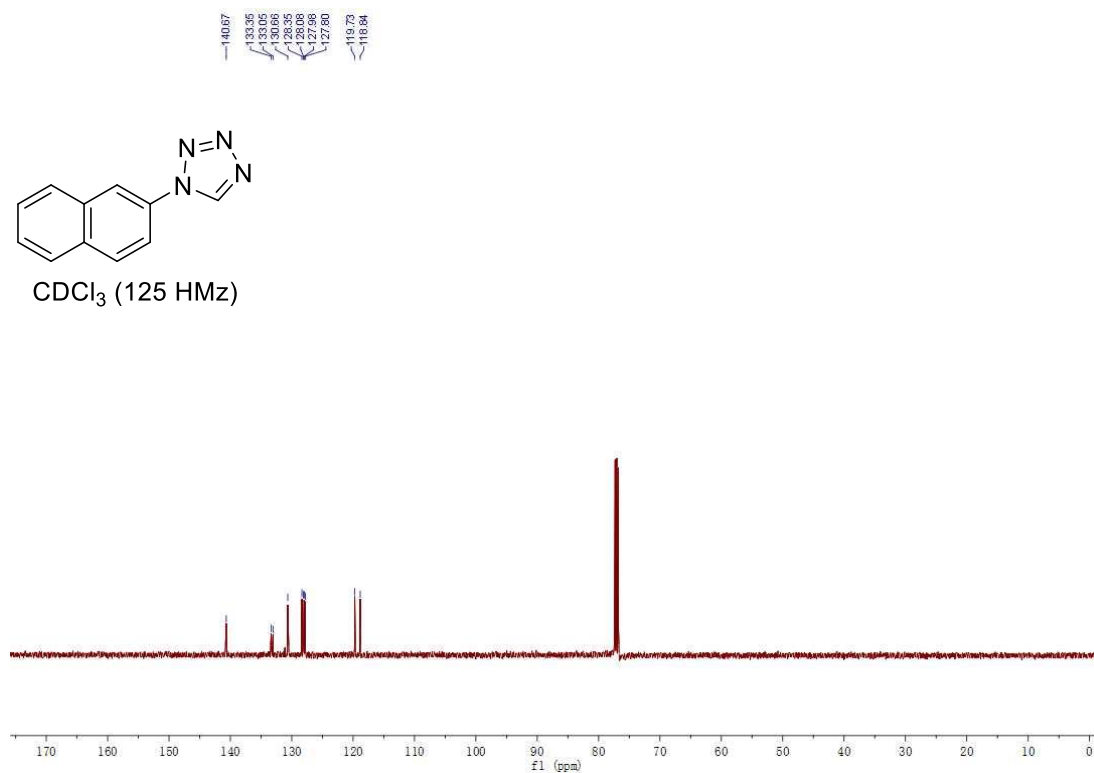

# 1-(9H-fluoren-9-yl)-1H-tetrazole (6r)

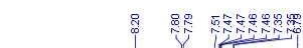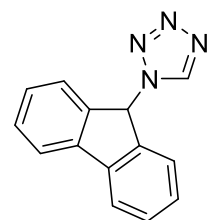

CDCl<sub>3</sub> (500 HMz)

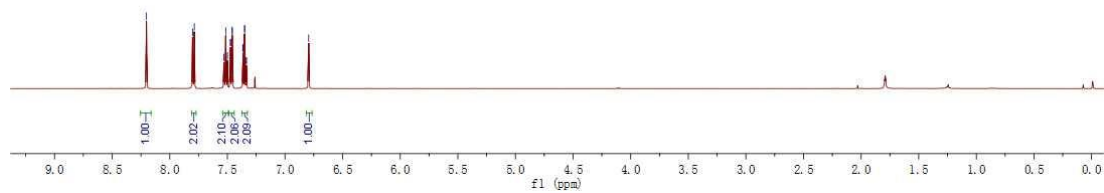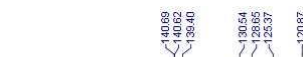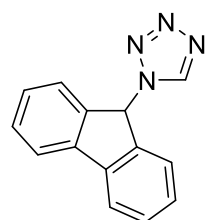

CDCl<sub>3</sub> (125 HMz)

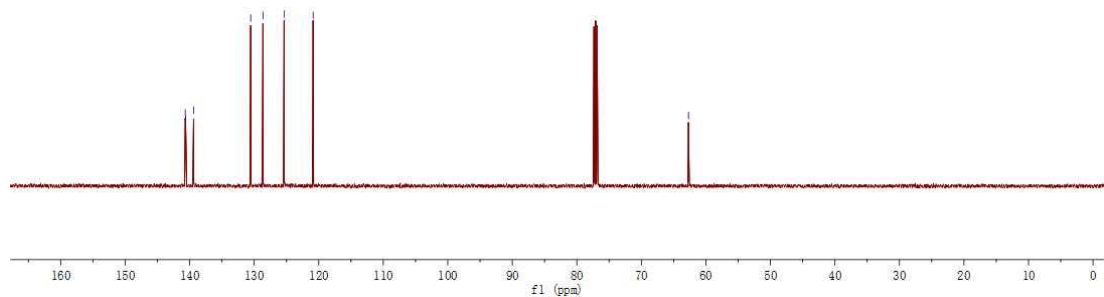

**1-((3s,5s,7s)-adamantan-1-yl)-1*H*-tetrazole (6s)**

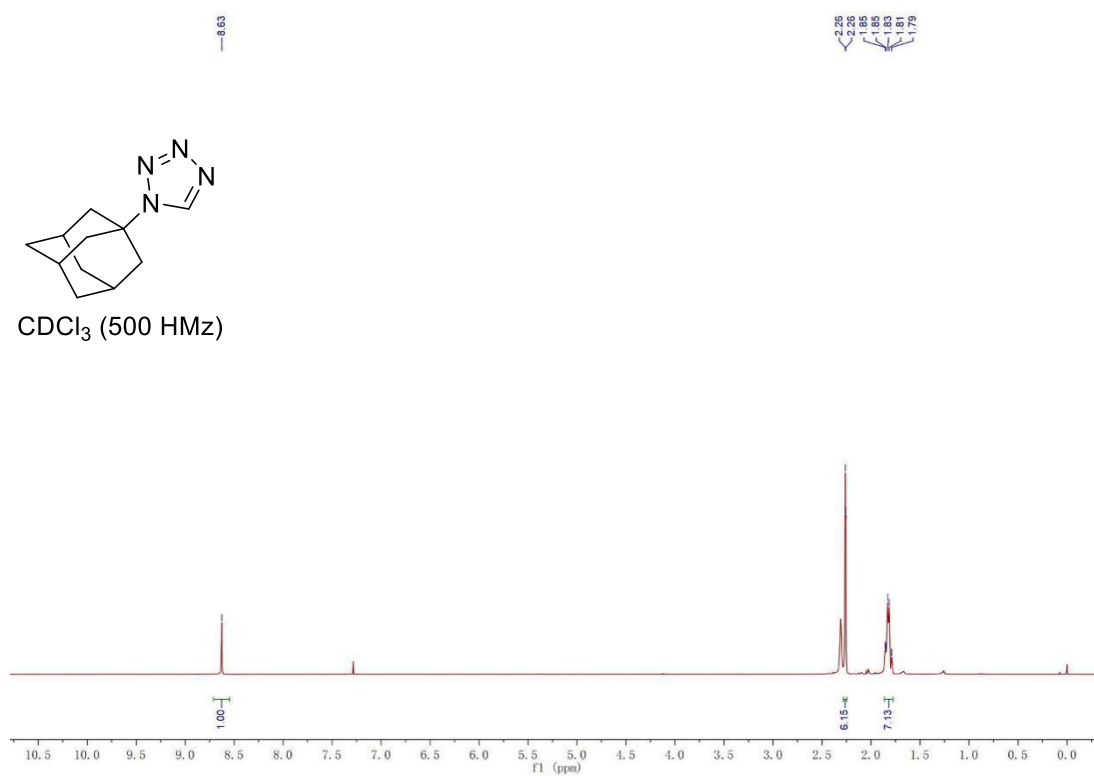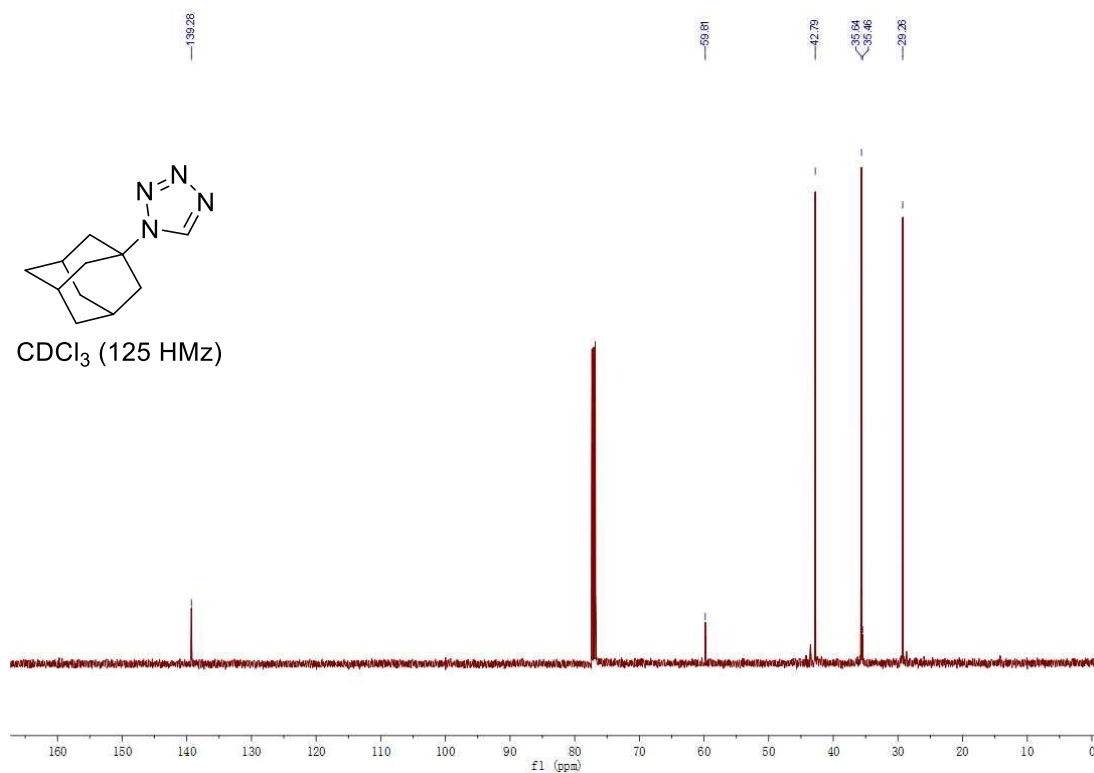

**methyl (*E*)-3-(*N*-(9-ethyl-9*H*-carbazol-3-yl)cyanamido)acrylate (7)**

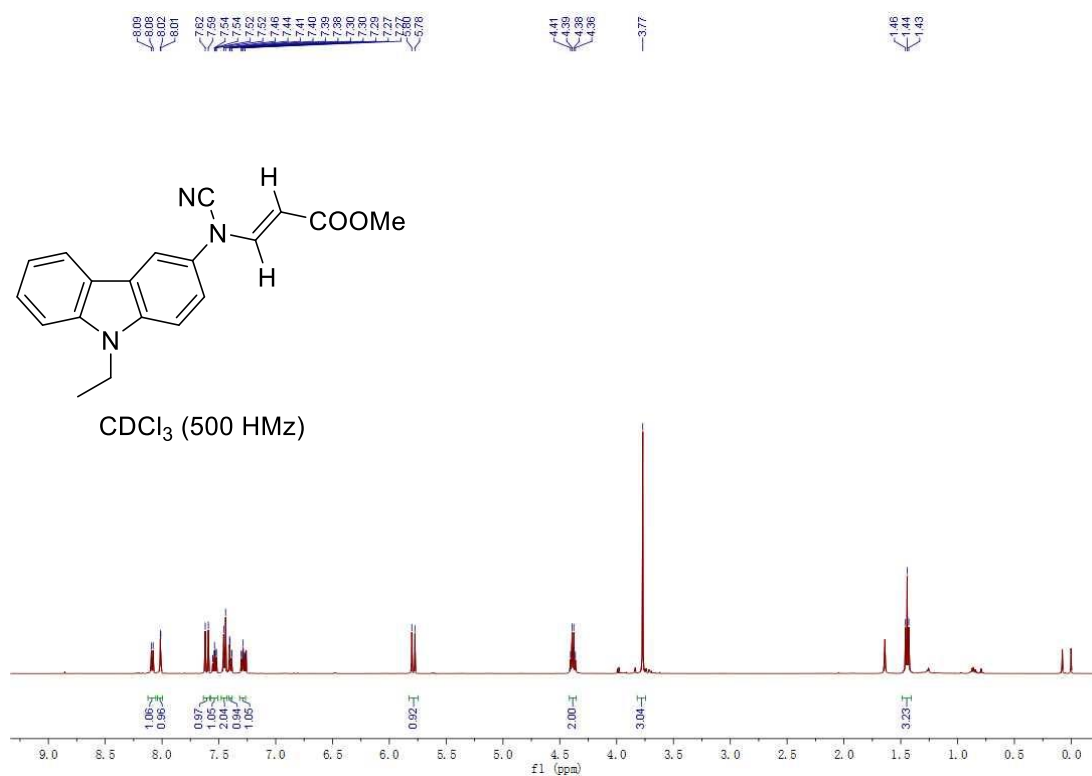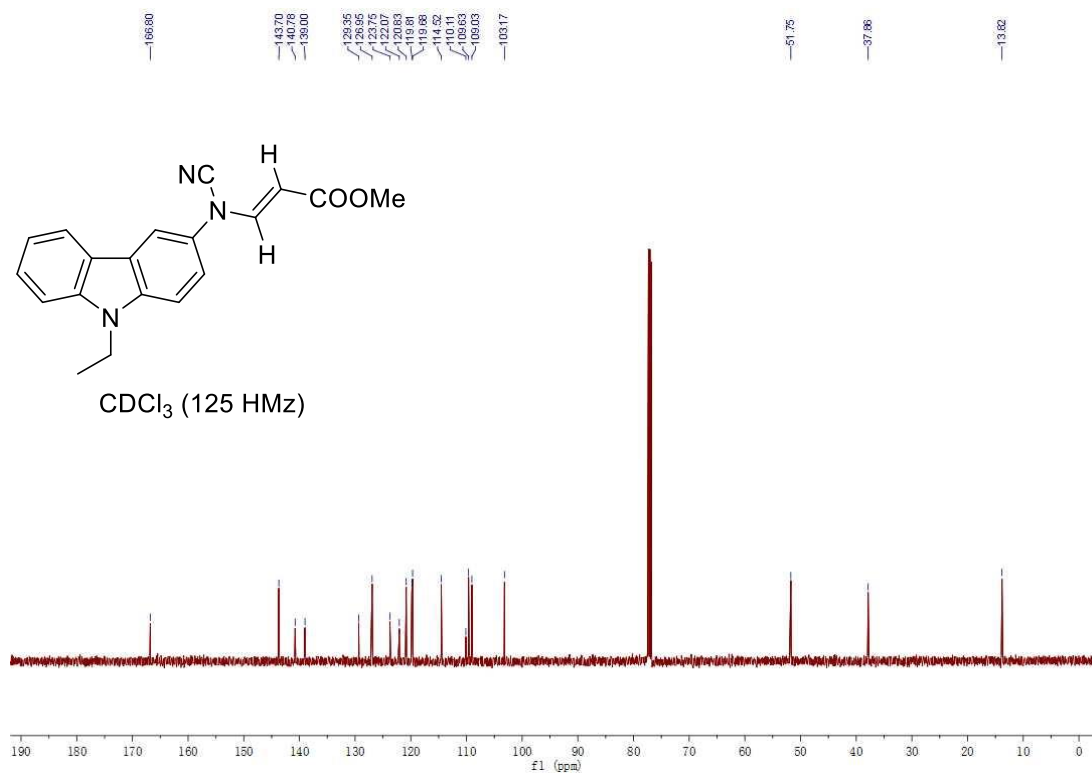

# 6,7-dimethyl-3,4-diphenylquinolin-2-amine (8)

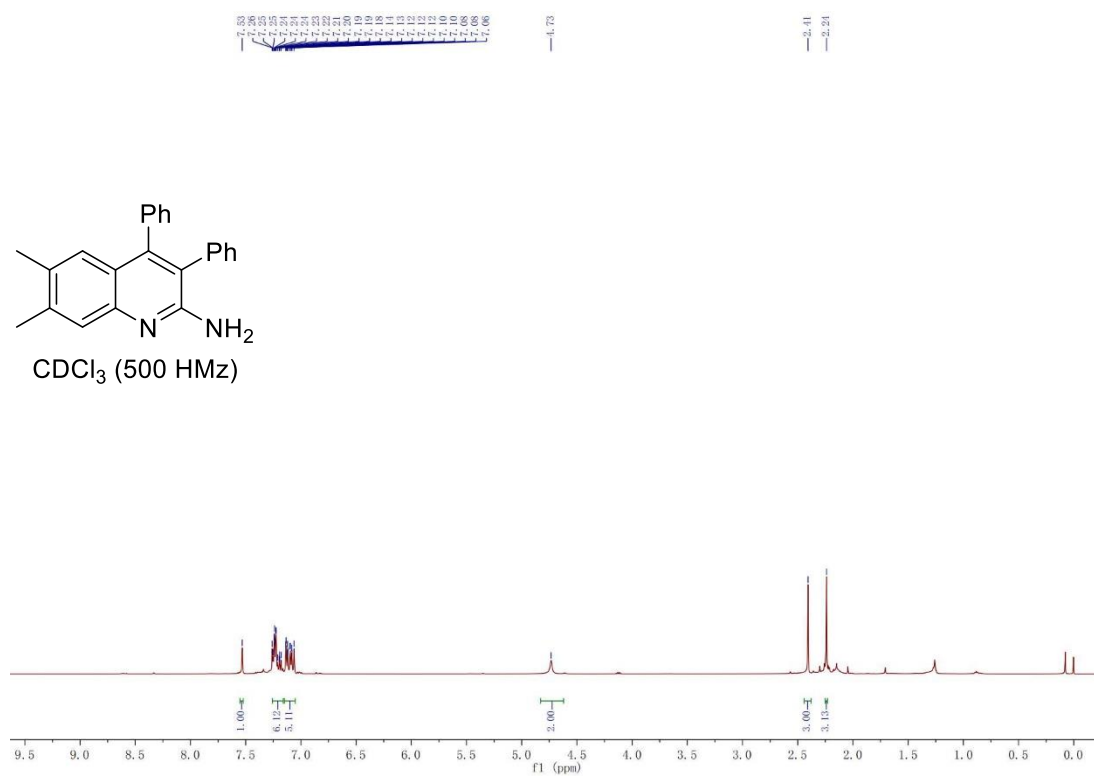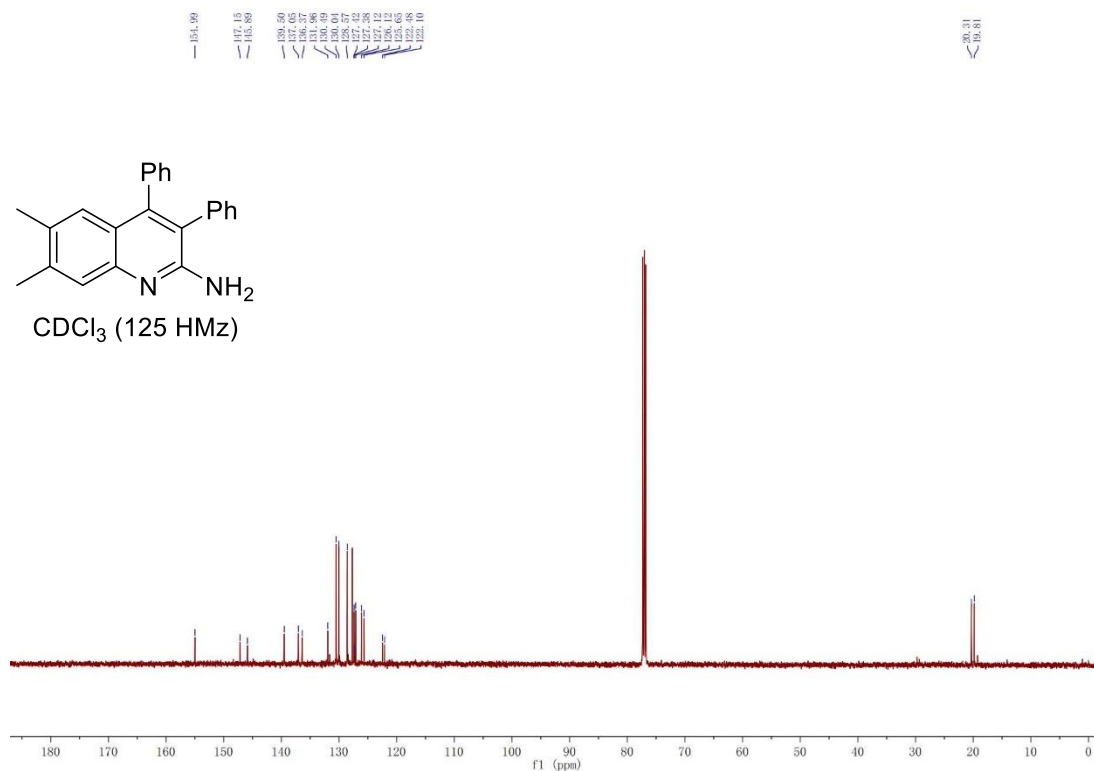

Supplement: d0cc01919d1.pdf [file d0cc01919d1.pdf]
